# Supplementary material for: Telomerase-independent survival leads to a mosaic of complex subtelomere rearrangements in Chlamydomonas reinhardtii
Source: bioRxiv or medRxiv preprint supplement (doi:10.1101/2023.01.23.525193), 2023-01-23
Supplement: Supplementary file [file media-1.pdf]

1  
2  
3  
4  
5  
6  
7  
8  
9  
10  
11  
12  
13  
14

## Supplementary Data

**Title: Telomerase-independent survival leads to diverse and complex subtelomere rearrangements in *Chlamydomonas reinhardtii***

Frédéric Chaux<sup>1,3</sup>, Nicolas Agier<sup>1,\*</sup>, Clotilde Garrido<sup>1,\*</sup>, Gilles Fischer<sup>1</sup>, Stephan Eberhard<sup>2</sup> and Zhou Xu<sup>1</sup>

**Affiliations:**

<sup>1</sup>Sorbonne Université, CNRS, UMR7238, Institut de Biologie Paris-Seine, Laboratory of Computational and Quantitative Biology, 75005 Paris, France

<sup>2</sup>Sorbonne Université, CNRS, UMR7141, Institut de Biologie Physico-Chimique, Laboratory of Chloroplast Biology and Light-Sensing in Microalgae, 75005 Paris, France

<sup>3</sup>present address: Laboratory for Marine and Atmospheric Biogeochemistry, Ruđer Bošković Institute, 10000 Zagreb, Croatia

\*These authors made equal contributions to this work.

| Strain          | Read count | Total Gb | Depth | Mean read length (kb) | N50 (kb) |
|-----------------|------------|----------|-------|-----------------------|----------|
| <b>CC-4533</b>  | 541 694    | 5.42     | 35X   | 10.0                  | 19.9     |
| <i>tel-m1-0</i> | 308 009    | 3.23     | 25X   | 10.5                  | 24.1     |
| <i>tel-m1-1</i> | 917 886    | 4.78     | 35X   | 5.2                   | 14.3     |
| <i>tel-m2-1</i> | 381 156    | 4.18     | 35X   | 11.0                  | 19.9     |

1

2 **Supp. Table ST1. CC-4533 and telomerase mutants Nanopore sequencing statistics.** Shown are the

3 “passed” datasets (read quality score >7). “N50” is the median read length weighted by base count.

4

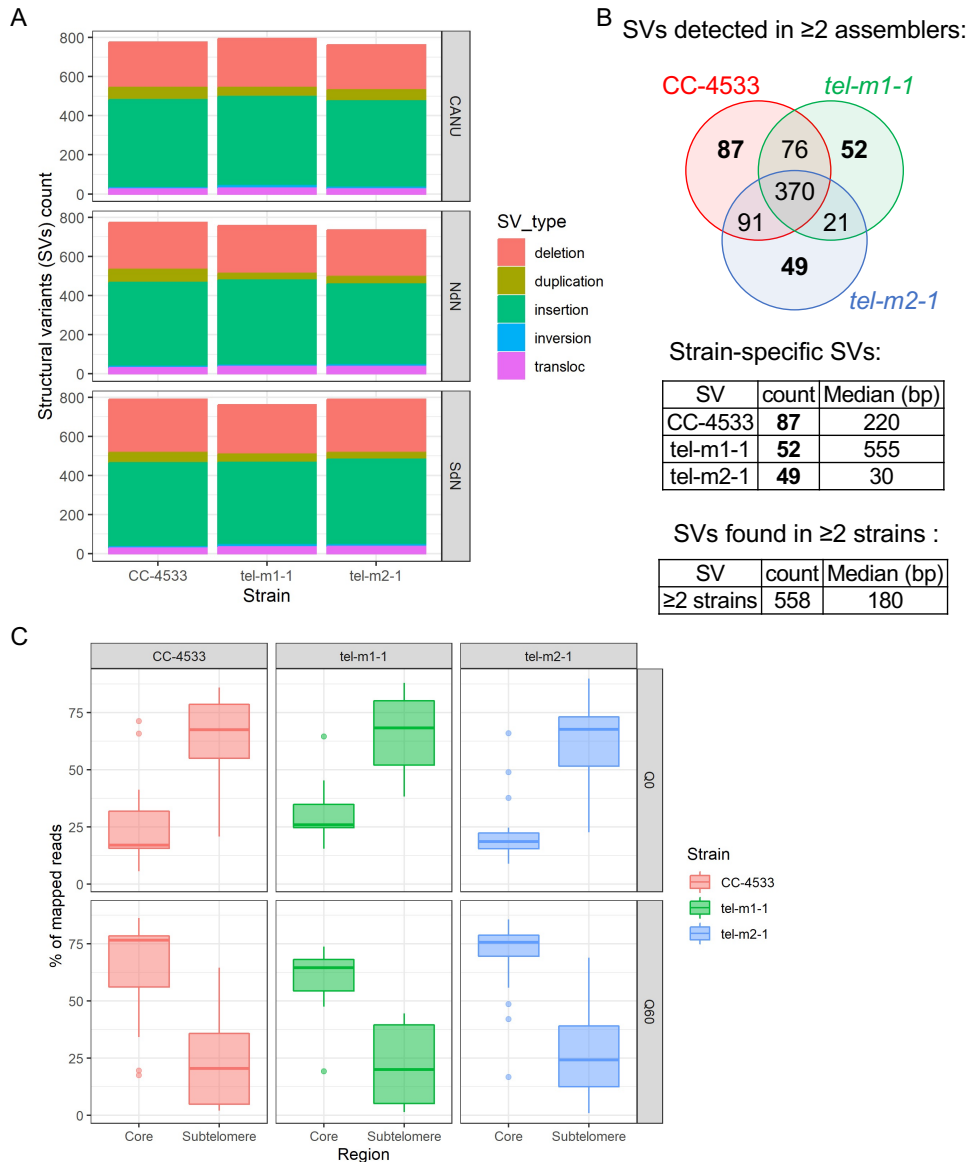

1

2 **Supplementary Figure 1. Analysis of SVs in the genome assemblies.** (A) Count of SVs of the indicated

3 types detected by MUM&Co in the assemblies of CC-4533, *tel-m1-1* and *tel-m2-1*, obtained from 3

4 assemblers (Canu, NextDenovo and SMARTdenovo), and compared to CC-1690. (B) Venn diagram

5 representation of unique and common SVs detected in the 3 strains, for SVs found in the genomes

6 built by at least 2 assemblers. The tables give the median size of the SVs. (C) Boxplots of the percentage

7 of reads of the lowest mapping quality (Q0) and of the highest (Q60), for reads mapping to

8 subtelomeres and the rest of the genome.

9

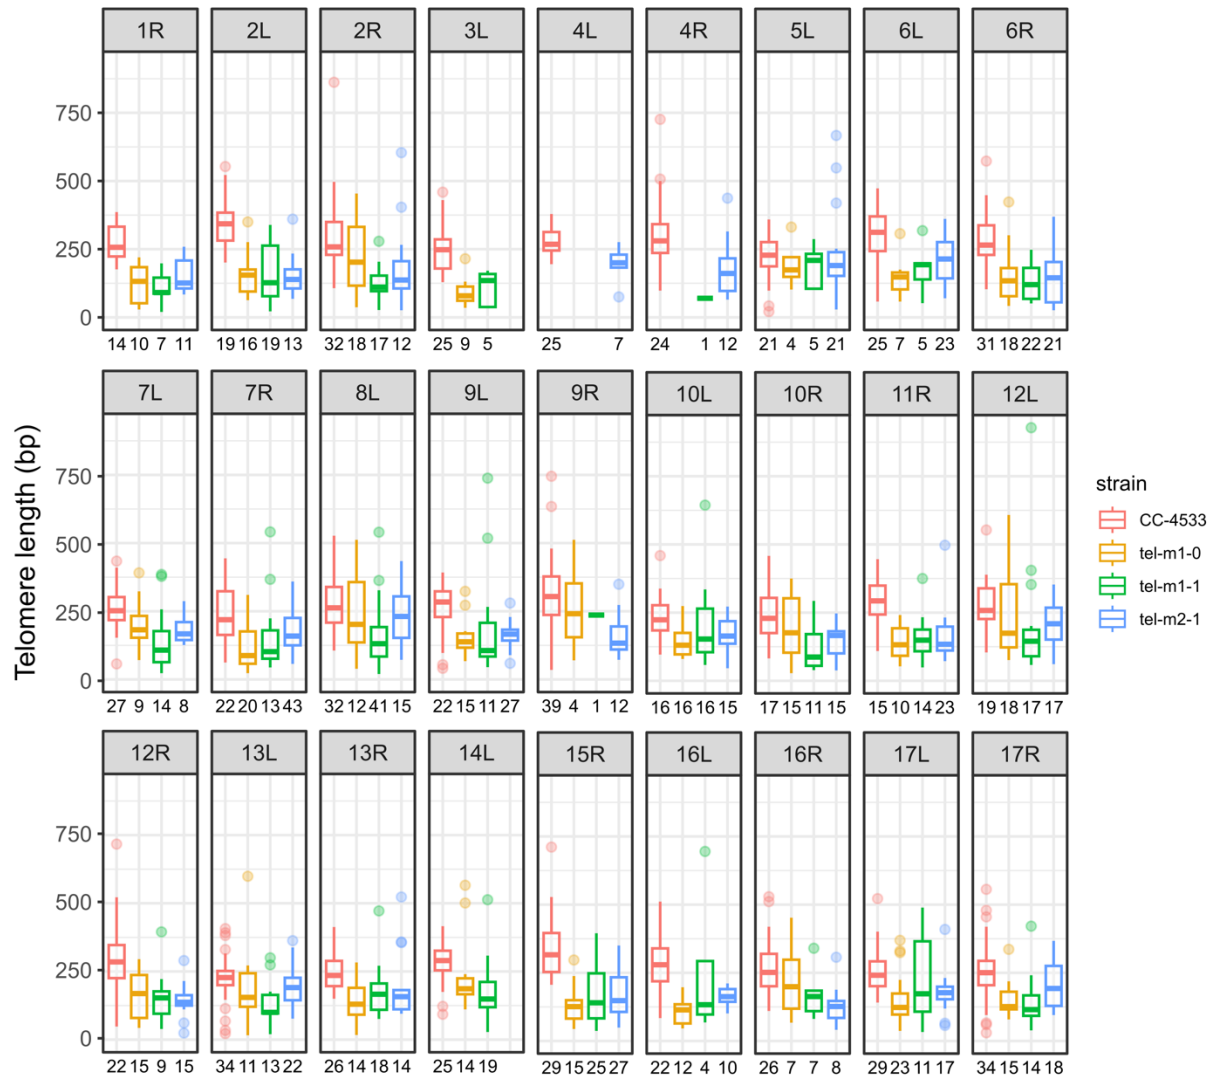

1

2 **Supplementary Figure 2. Telomere length distribution for each Sultan subtelomere.** The telomere  
 3 length distribution of each uniquely identifiable class A and class subtelomere is represented as a  
 4 boxplot for each indicated strain. The number of corresponding reads is indicated under the boxes.

5

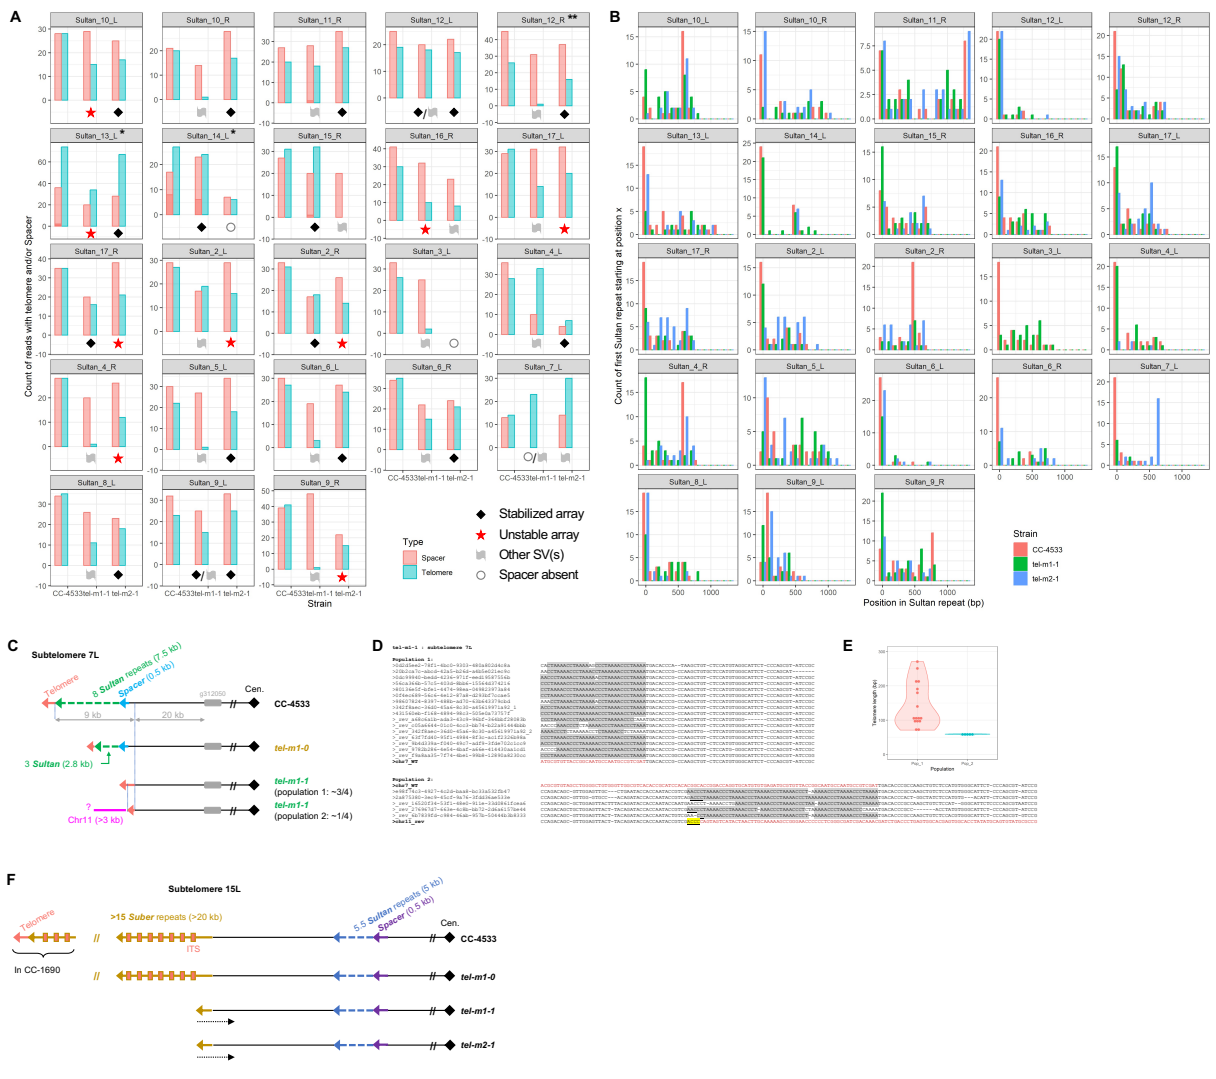

1  
2 **Supplementary Figure 3. Some Sultan and Suber arrays shorten progressively until complete**  
3 **degradation.** (A) For the indicated class A and B Sultan arrays, the number of reads containing both a  
4 telomere sequence and Sultan elements is indicated as a blue bar. The number of reads containing  
5 both the Spacer element and Sultan elements is shown as a red bar. In CC-4533, the near equality  
6 between these two numbers for most subtelomeres strongly suggests that each of these  
7 subtelomeres, starts with a Spacer and ends with a telomere sequence at the individual DNA molecule  
8 level. It is mostly the case also for stabilized Sultan arrays in the mutants, marked by a black diamond.  
9 In contrast, unstable Sultan arrays (red star) nearly always show more Spacer-Sultan reads than  
10 telomere-Sultan reads, suggesting that the chromosome extremity ends with a Sultan element.  
11 Subtelomeres with additional SVs (gray flag) cannot be subjected to this analysis. Circles indicate the

1 partial loss or complete absence of Spacer sequence. \*For 13L and 14L, the Sultan element was found  
2 associated with 2 distinct Spacer elements (light and dark red parts of the histogram); besides, both  
3 subtelomeres are from class B, thus their Sultan elements contain insertions that might map elsewhere  
4 in the genome close to ITS, hence the high number of telomeres associated with the Sultan.  
5 \*\*Subtelomere 12R contains two identical Spacer sequences, thus increasing the count of Sultan reads  
6 associated with a Spacer (see also Supp. Dataset 1). (B) Distribution of the position of Sultan-telomere  
7 transition in the last Sultan for stabilized Sultan arrays or of the last Sultan element in unstable arrays,  
8 in CC-4533, *tel-m1-1* and *tel-m2-1*. (C) Schematic representation of subtelomere 7L in CC-4533, *tel-m1-*  
9 *0* and *tel-m1-1*, showing a decrease in the number of Sultans in *tel-m1-0* compared to CC-4533 and a  
10 total loss of all Sultans and the Spacer sequence in *tel-m1-1*, with the formation of a new telomere and  
11 even the additional translocation of a sequence from chromosome 11 in a subpopulation. (D)  
12 Chromosome 7 to telomere junction in subpopulation 1 of reads and chromosome 7 to ITS to  
13 chromosome 11 junctions in subpopulation 2 of reads, as defined in (C). The last junction involves a  
14 microhomology of 4 bp (highlighted in yellow). (E) Telomere length distribution of the terminal  
15 telomere in subpopulation 1 and of the ITS in subpopulation 2, as defined in (C). (F) Schematic  
16 representation of class C subtelomere 15L displaying a structure containing Suber elements in *tel-m1-*  
17 *0* similar to CC-4533, which presumably ends with telomeres as shown for CC-1690<sup>24</sup>, but with only  
18 one partial Suber remaining in *tel-m1-1* and *tel-m2-1*, suggesting a progressive loss of Suber elements.  
19

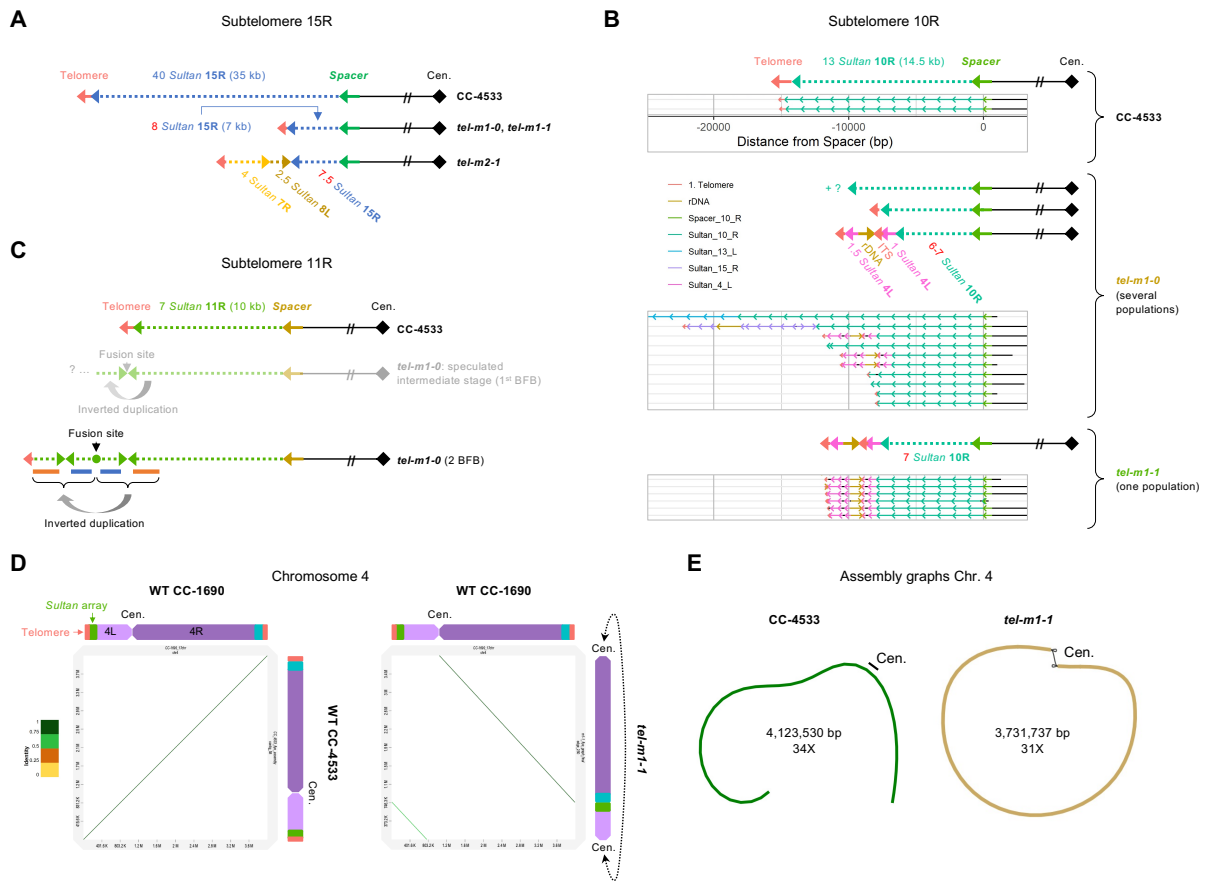

1

2 **Supplementary Figure 4. Complex multistep rearrangements at chromosome extremities.** (A)

3 Schematic representation of subtelomere 15R in CC-4533, *tel-m1-0*, *tel-m1-1* and *tel-m2-1*. (B)

4 Schematic representation of subtelomere 10R and reads supporting the depicted structures. Several

5 subpopulations are present in *tel-m1-0* and after purifying selection, *tel-m1-1* is only comprised of one

6 subpopulation. (C) Schematic representation of subtelomere 11R in *tel-m1-0* compared to CC-4533.

7 Signature of BFB with multiple inverted repeats suggests at least 2 cycles of BFB. The speculated

8 intermediate stage is shown in shaded colors. (D) Dot plot representation of the alignment of

9 chromosome 4 between CC-1690 and CC-4533 (left), and CC-1690 and *tel-m1-1* (right). The extremities

10 of chromosome 4 of CC-4533 are no longer present in *tel-m1-1*. (E) Graph representation of

11 chromosome 4 of CC-4533 (linear) and *tel-m1-1* (circular topology).

12

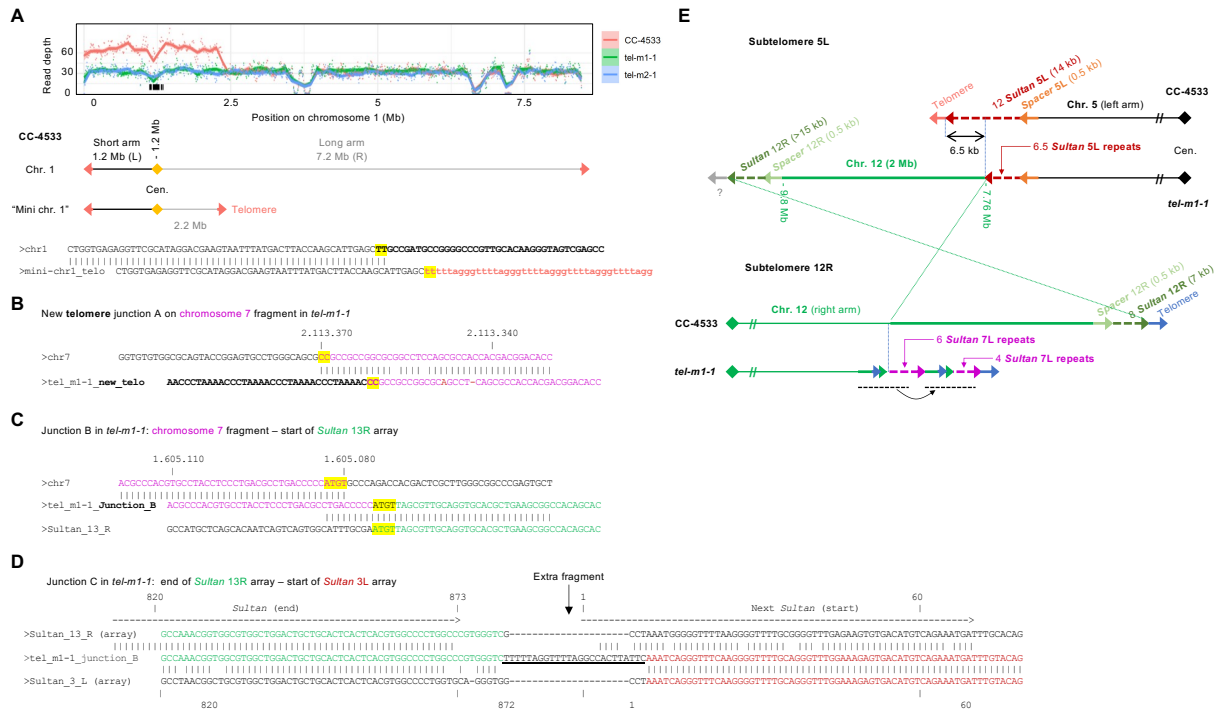

1

2 **Supplementary Figure 5. New telomere-capped extremities and junction sequences.** (A) Schematic

3 representation of the mini-chromosome 1 in CC-4533 (middle part), corresponding to a centromere-

4 containing duplicated region of chromosome 1 as shown by the sequencing depth graph (upper part).

5 The junction sequence from mini-chromosome 1 to the new telomere is displayed, with a 2-bp

6 microhomology highlighted in yellow. (B) Sequence of junction A as marked in Fig. 5B, showing a 2-bp

7 microhomology highlighted in yellow. (C) Sequence of junction B as marked in Fig. 5B, with a 4-bp

8 microhomology. (D) Sequence of junction C as marked in Fig. 5B, with the insertion of a short extra

9 fragment between Sultan 13R array and Sultan 3L array, the 2 border Sultan elements being full length.

10



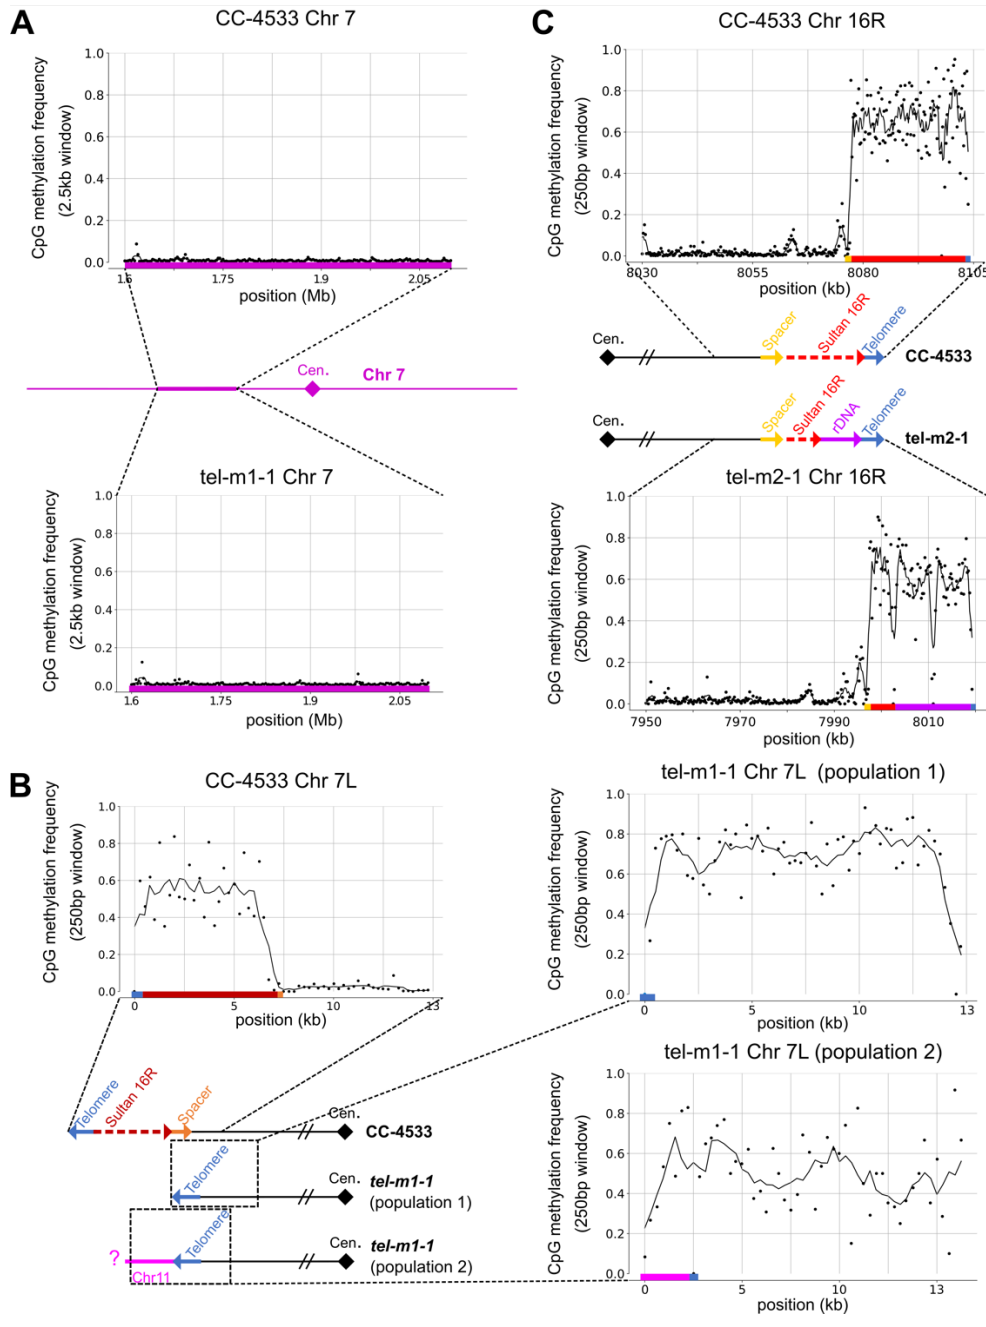

1

2 **Supplementary Figure 6. Methylation frequency of other chromosome regions and extremities.** (A-  
 3 C) Analysis of 5mC frequency at CpG sites using reads that unambiguously spanned the indicated  
 4 regions, in different illustrative cases. (A) At the original region of chromosome 7 that was duplicated  
 5 in *tel-m1-1*, shown here for CC-4533 and *tel-m1-1*. (B) At subtelomere 16R where in *tel-m2-1*, the  
 6 structure shows a shorter hypermethylated Sultan array and a hypermethylated rDNA sequence  
 7 capped by a telomere, compared to CC-4533 where only the hypermethylated Sultan array is present.

1 (D) At the new 7L extremity of *tel-m1-1* where methylation spreads further towards the interior of the  
2 genome compared to CC-4533 where the hypermethylated domain stops at the Spacer sequence.

3

4 **Supp. Dataset 1. Spacer-based analysis of subtelomeres.** All Spacer-containing reads anchored at the  
5 Spacer element are depicted for each subtelomere for CC-4533, *tel-m1-0*, *tel-m1-1* and *tel-m2-1*.

6
