# Supplementary material for: Telomerase-independent survival leads to a mosaic of complex subtelomere rearrangements in Chlamydomonas reinhardtii
Source: bioRxiv or medRxiv preprint supplement (doi:10.1101/2023.01.23.525193), 2023-01-23
Supplement: Supplementary file [file media-2.pdf]

Spacer\_2\_L

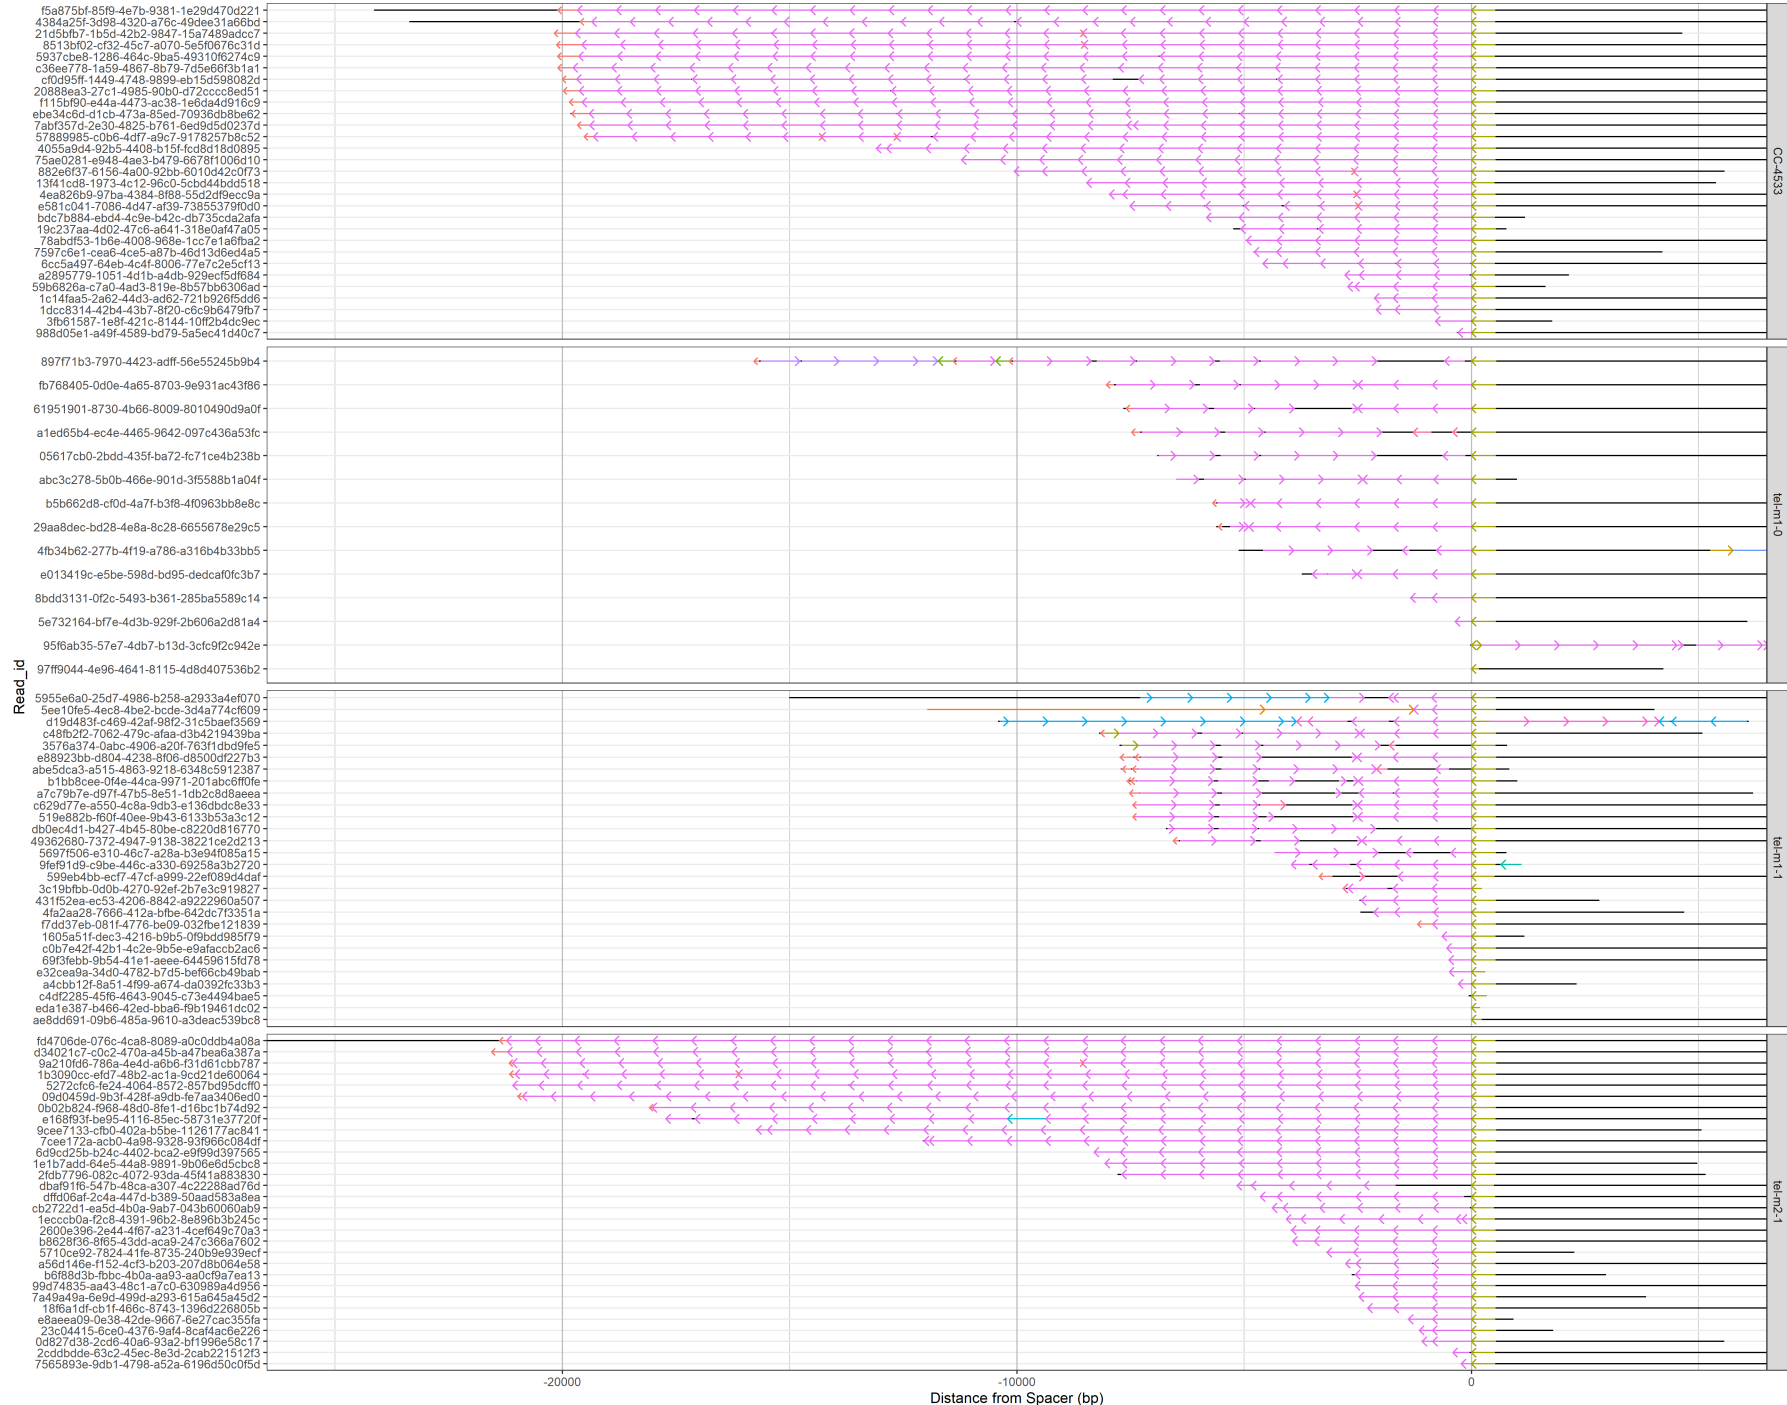

- Query
- 1. Telomere
  - rDNA
  - Spacer\_14\_L
  - Spacer\_2\_L
  - Suber\_1500
  - Suber\_2500
  - Sultan\_1\_R
  - Sultan\_11\_R
  - Sultan\_12\_L
  - Sultan\_13\_R
  - Sultan\_14\_L
  - Sultan\_16\_R
  - Sultan\_2\_L
  - Sultan\_6\_R
  - Sultan\_8\_L

Spacer\_2\_R

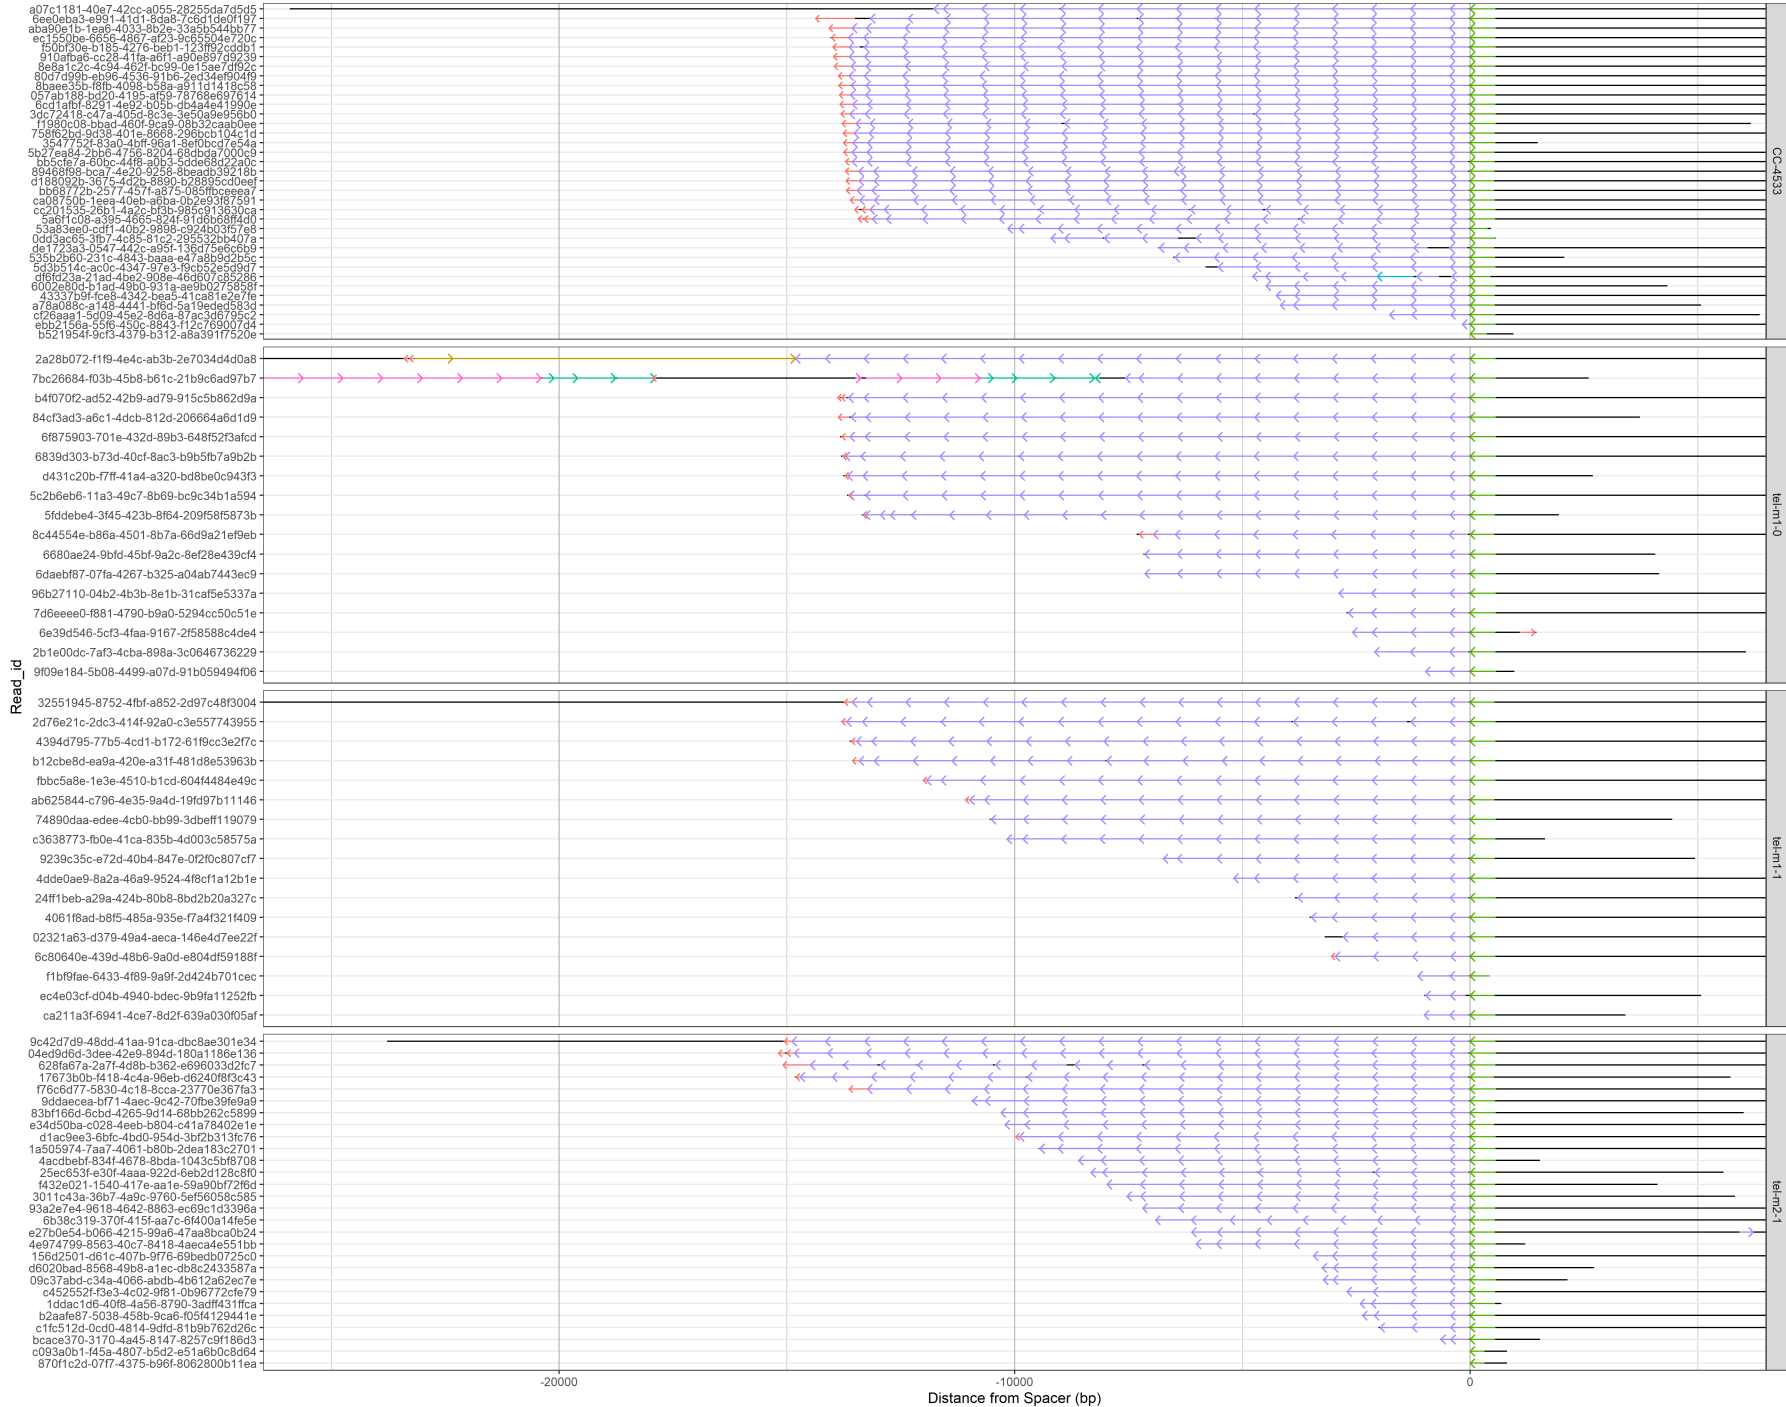

-20000

-10000

0

Spacer\_3\_L

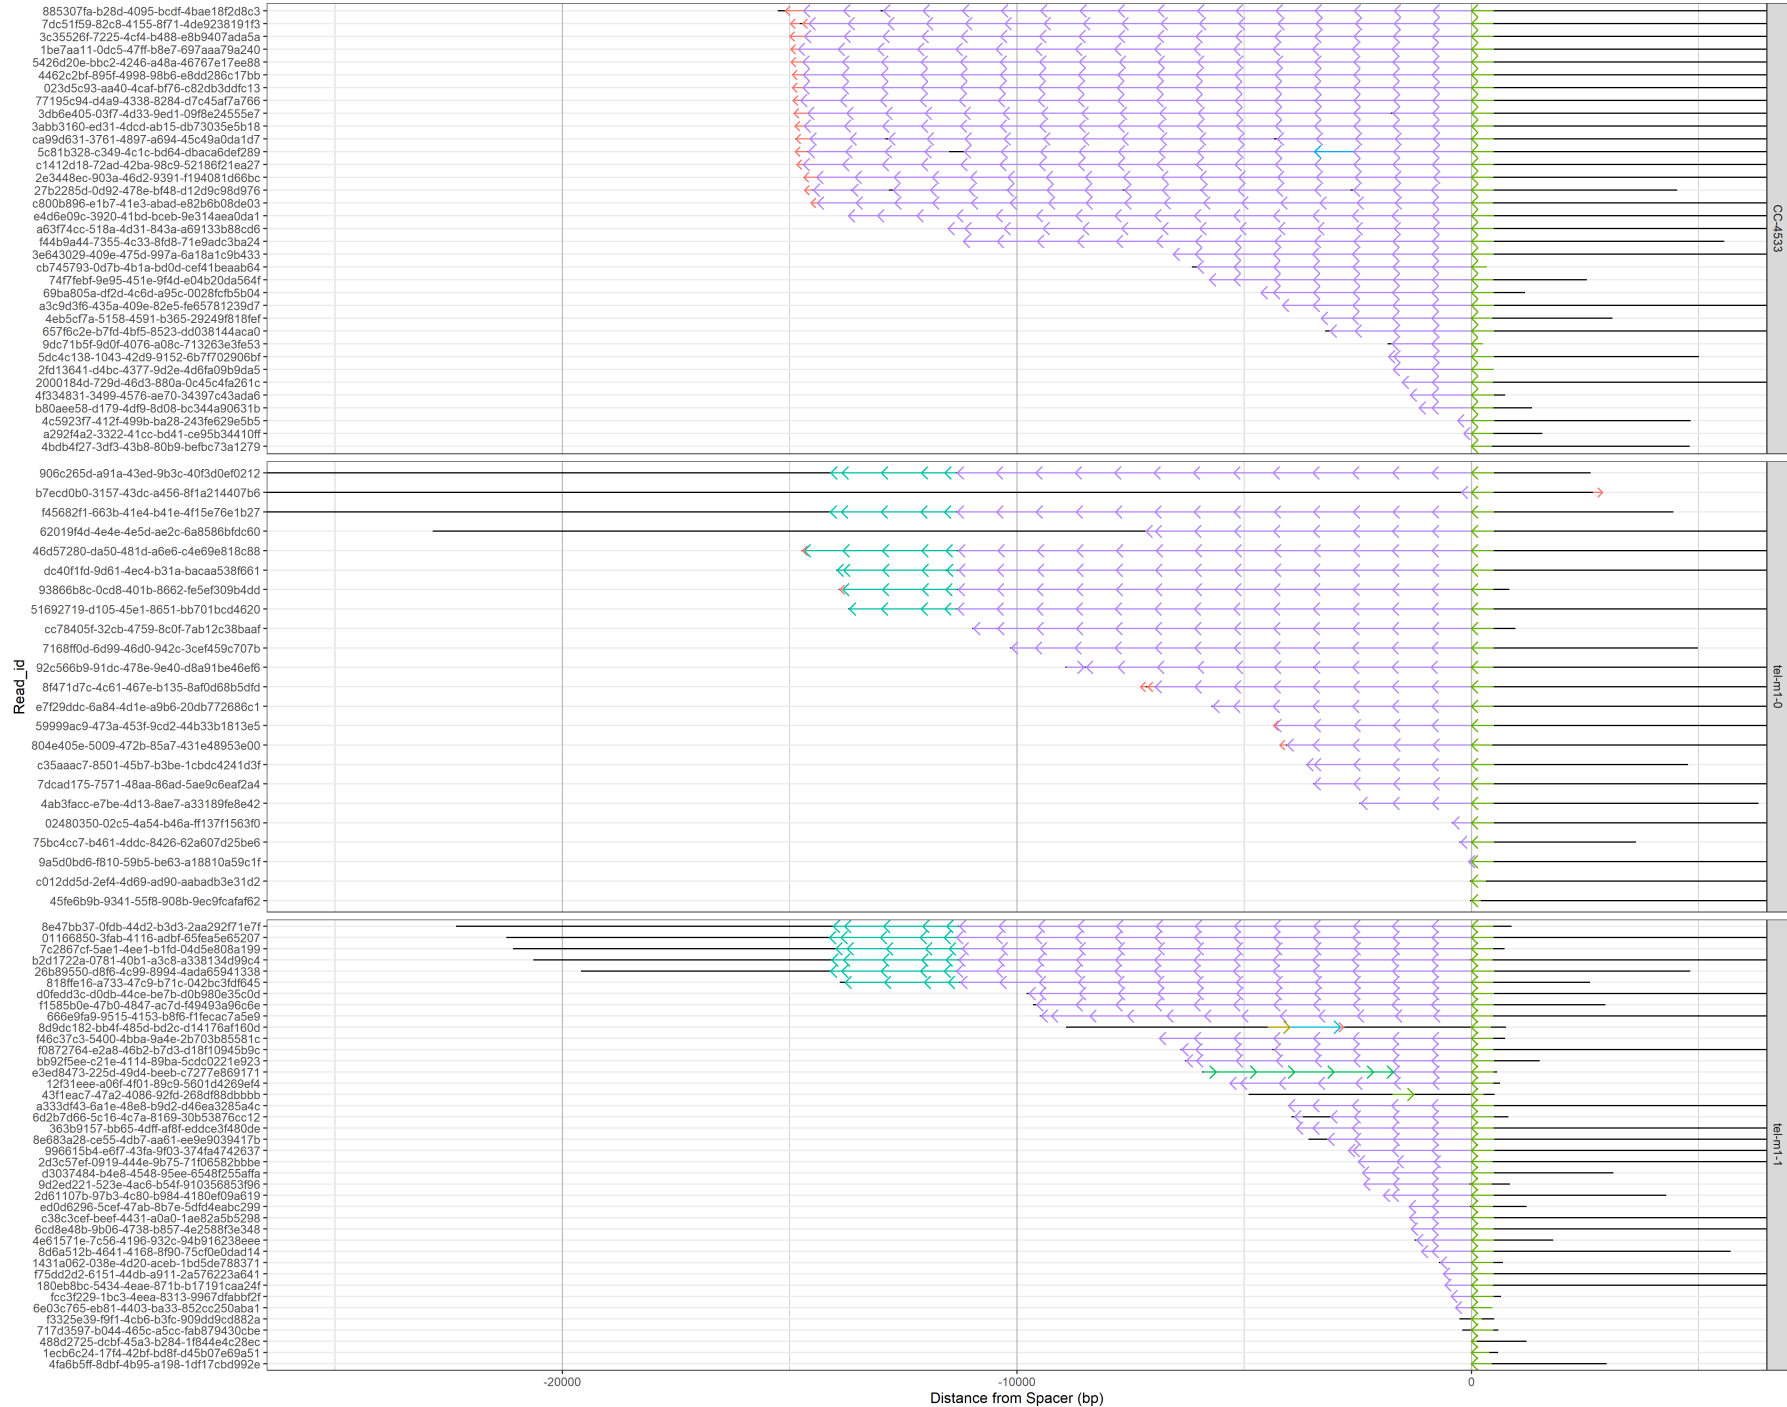

- Query
- 1. Telomere
  - rDNA
  - Spacer\_3\_L
  - Spacer\_3\_L
  - Sultan\_10\_L
  - Sultan\_13\_R
  - Sultan\_16\_R
  - Sultan\_3\_L
  - Sultan\_4\_L
  - Sultan\_8\_L

Spacer\_3\_R

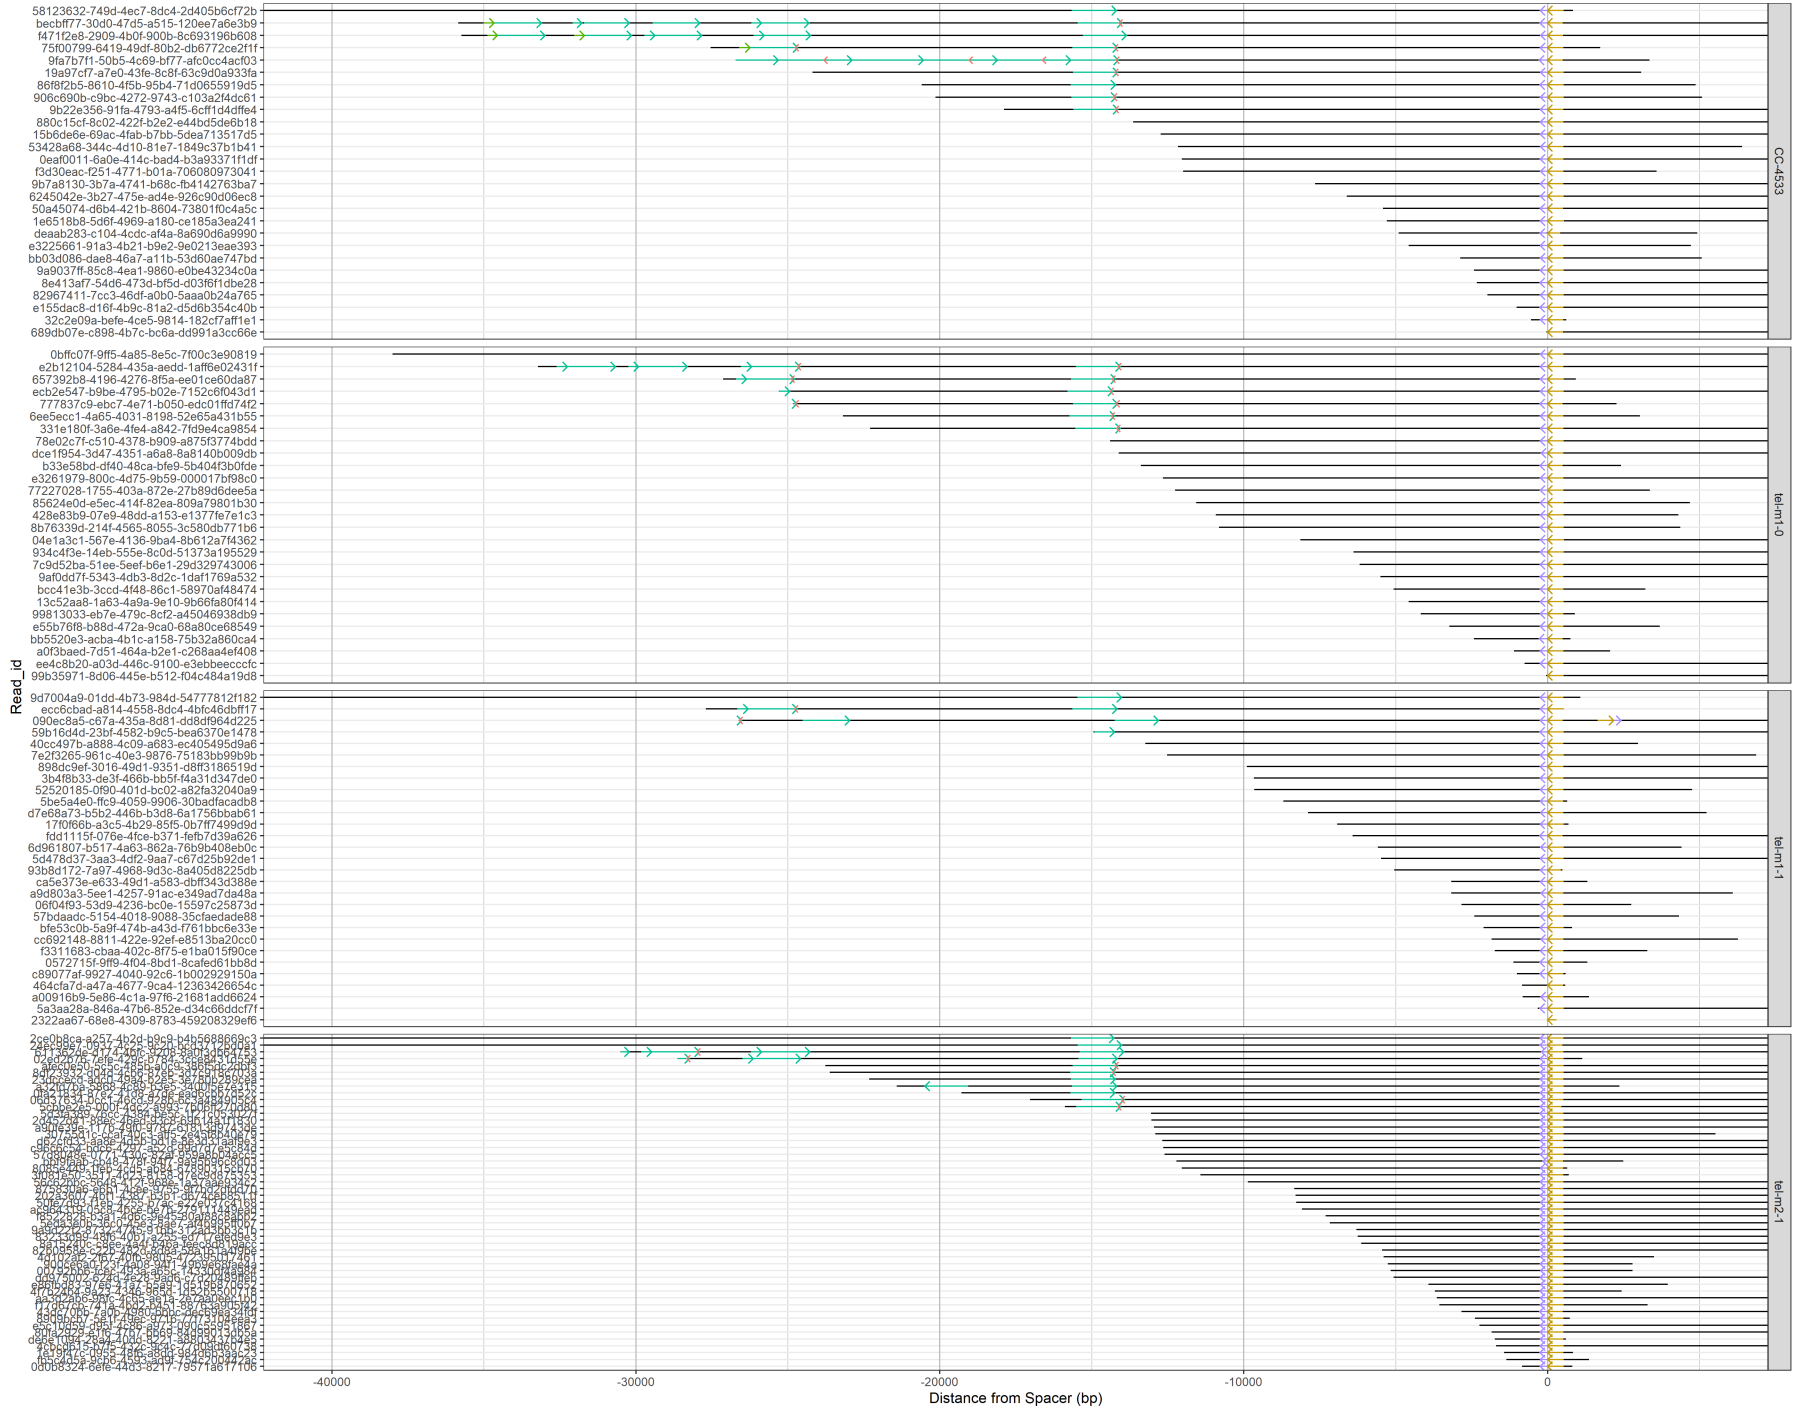



Spacer\_4\_L

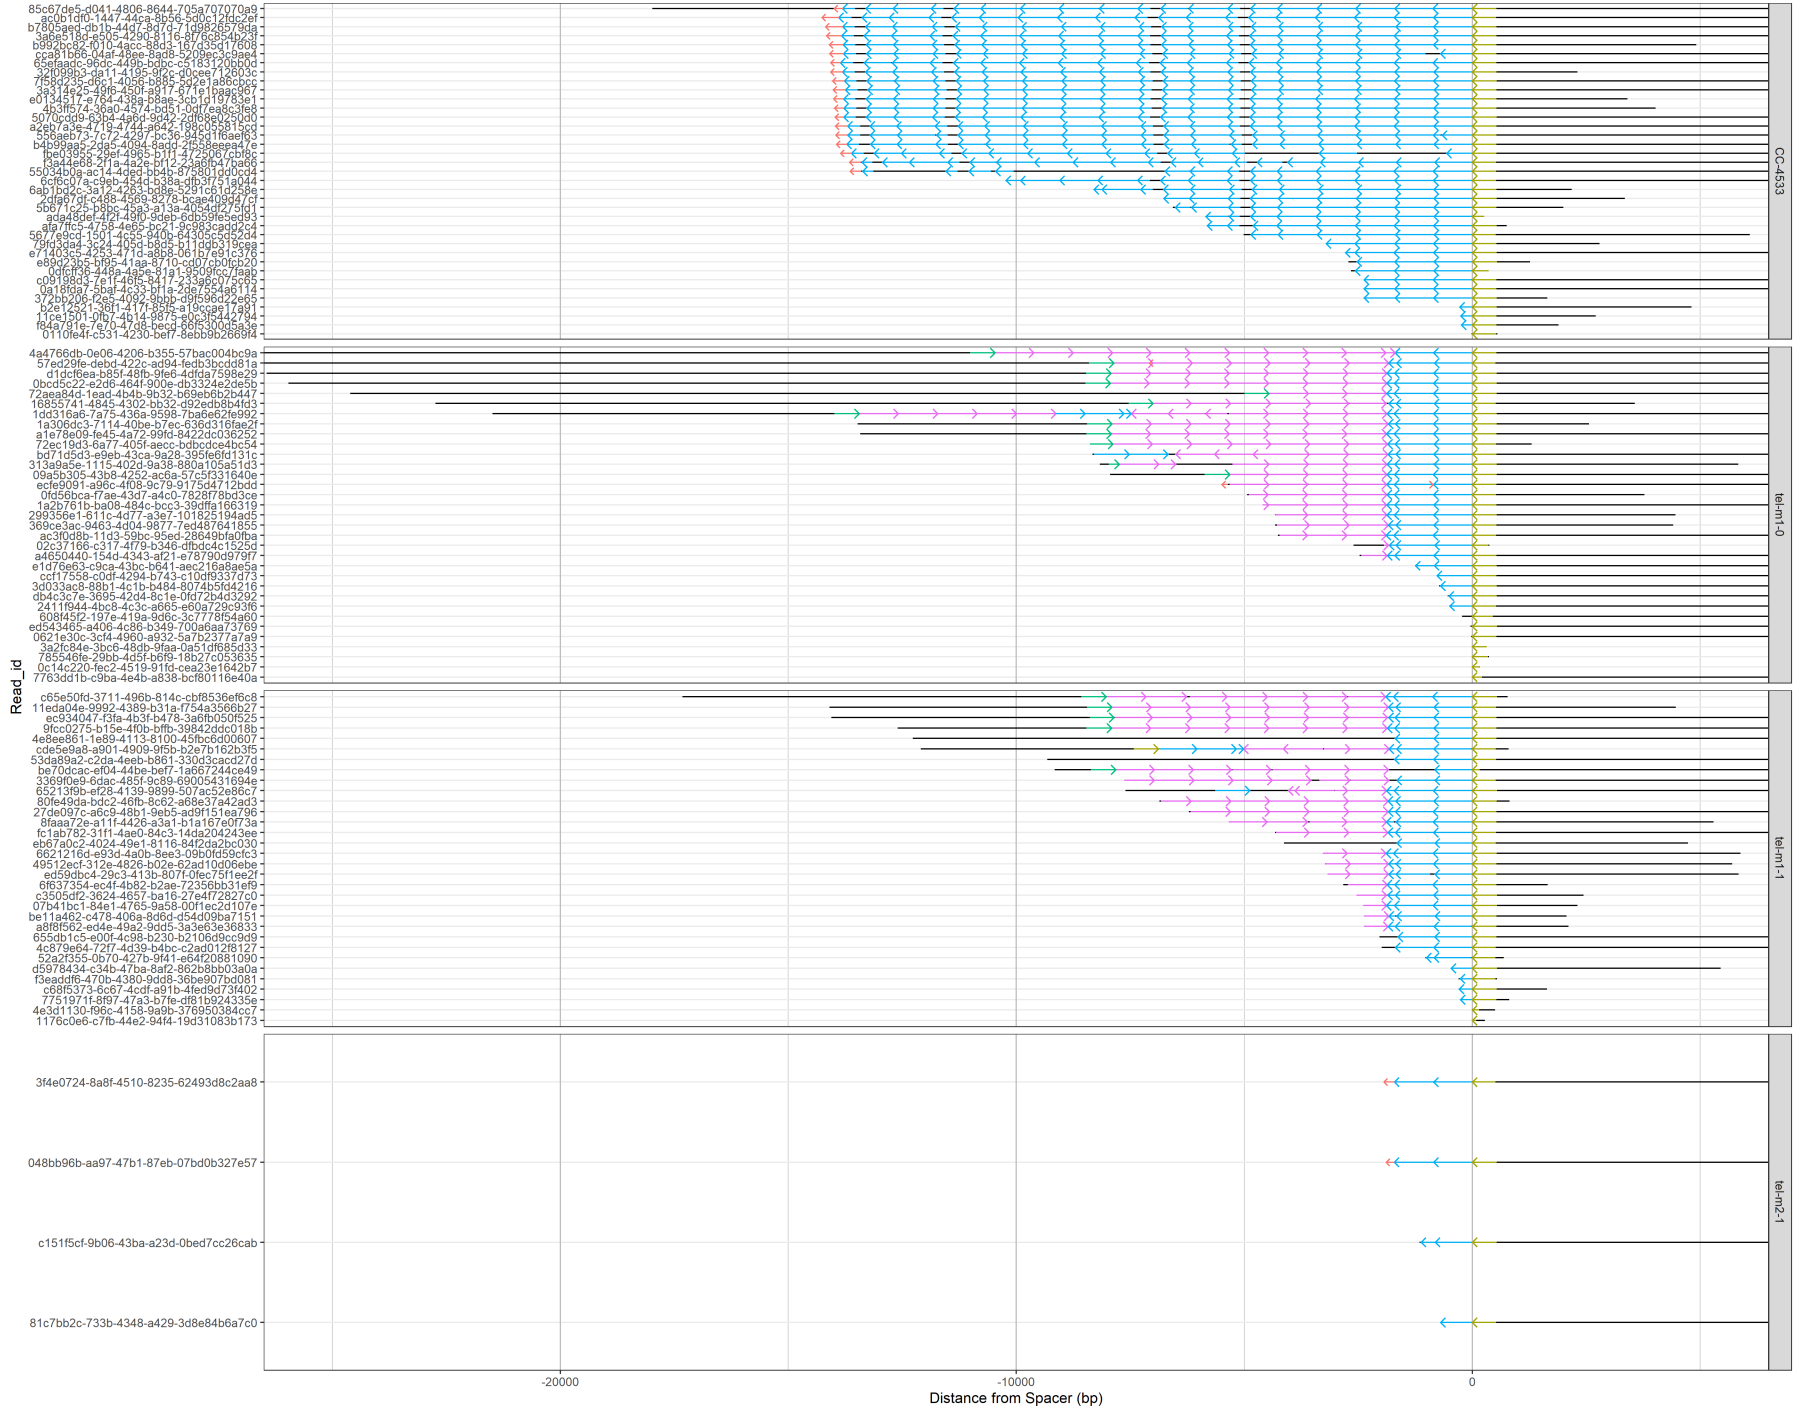

- Query
- 1. Telomere
  - Spacer\_4\_L
  - Spacer\_4\_R
  - Sultan\_4\_L
  - Sultan\_4\_R

-20000

-10000

0

Distance from Spacer (bp)

Spacer\_4\_R

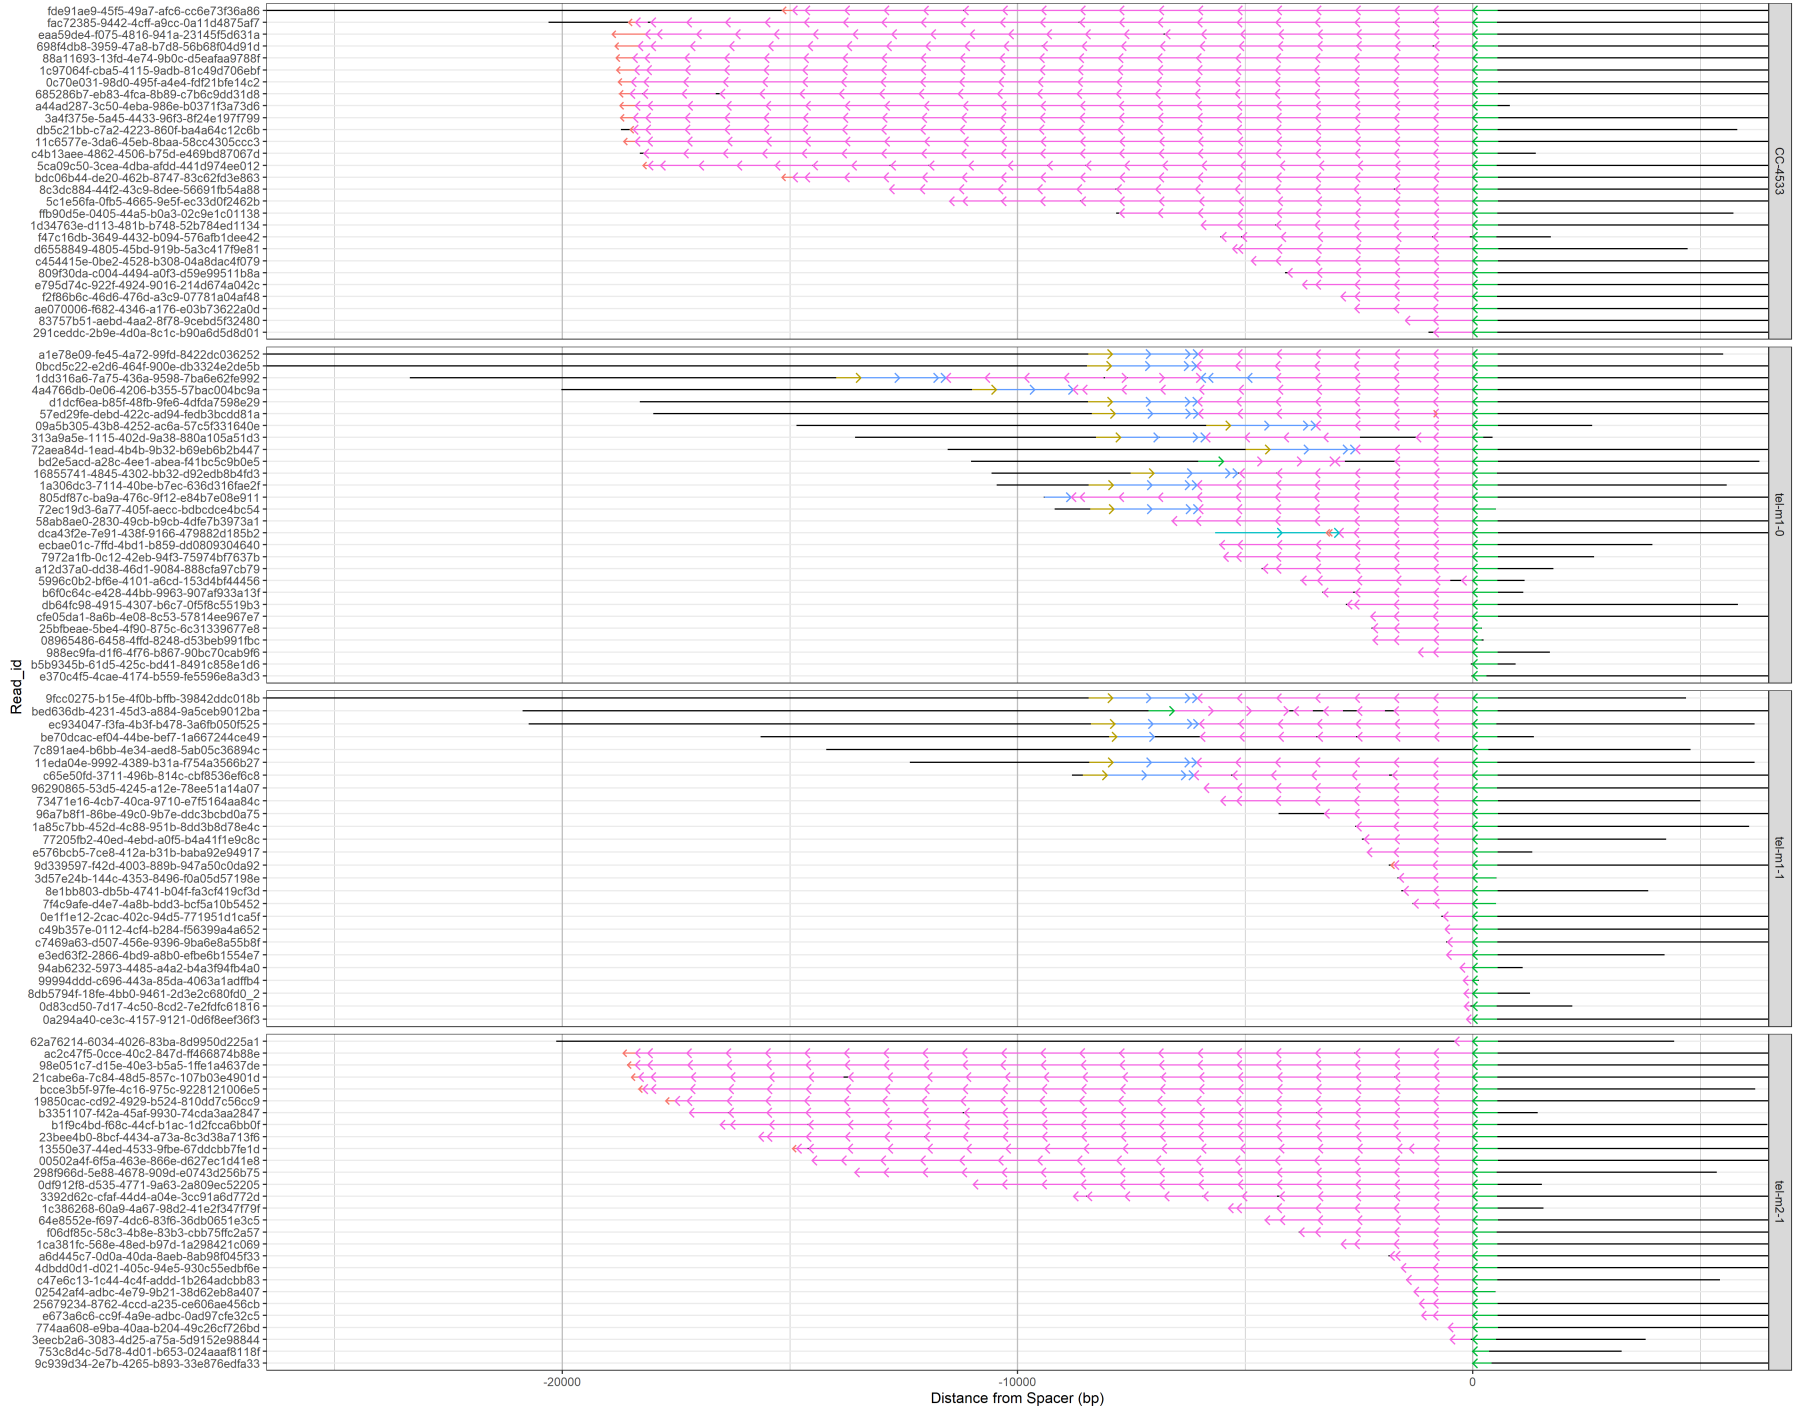

-20000

-10000

0

Distance from Spacer (bp)

Spacer\_5\_L

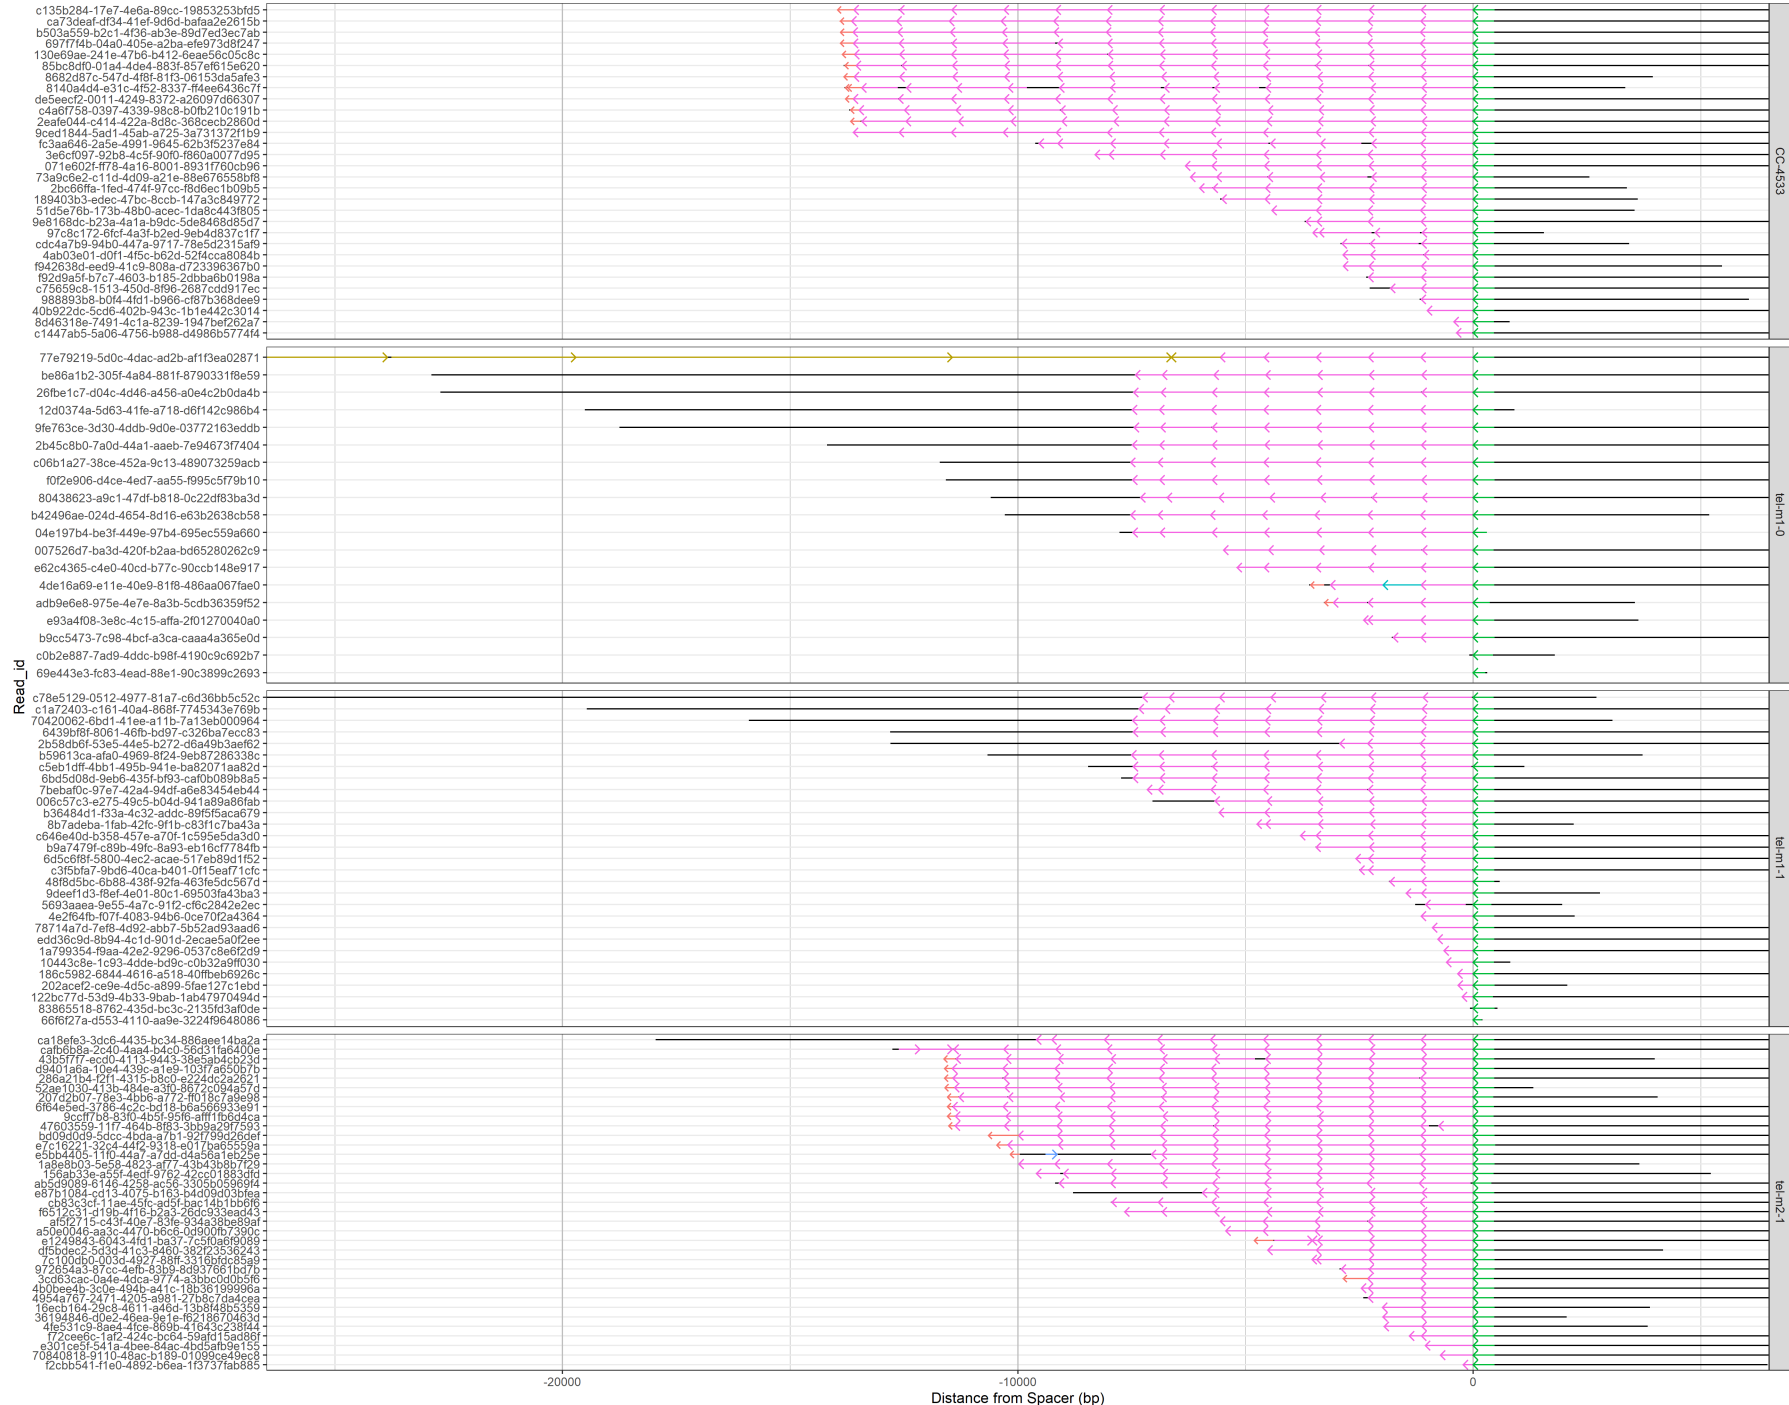

- 1. Telomere
- rDNA
- Spacer\_5\_L
- Sultan\_12\_R
- Sultan\_4\_L
- Sultan\_5\_L

Spacer\_6\_L

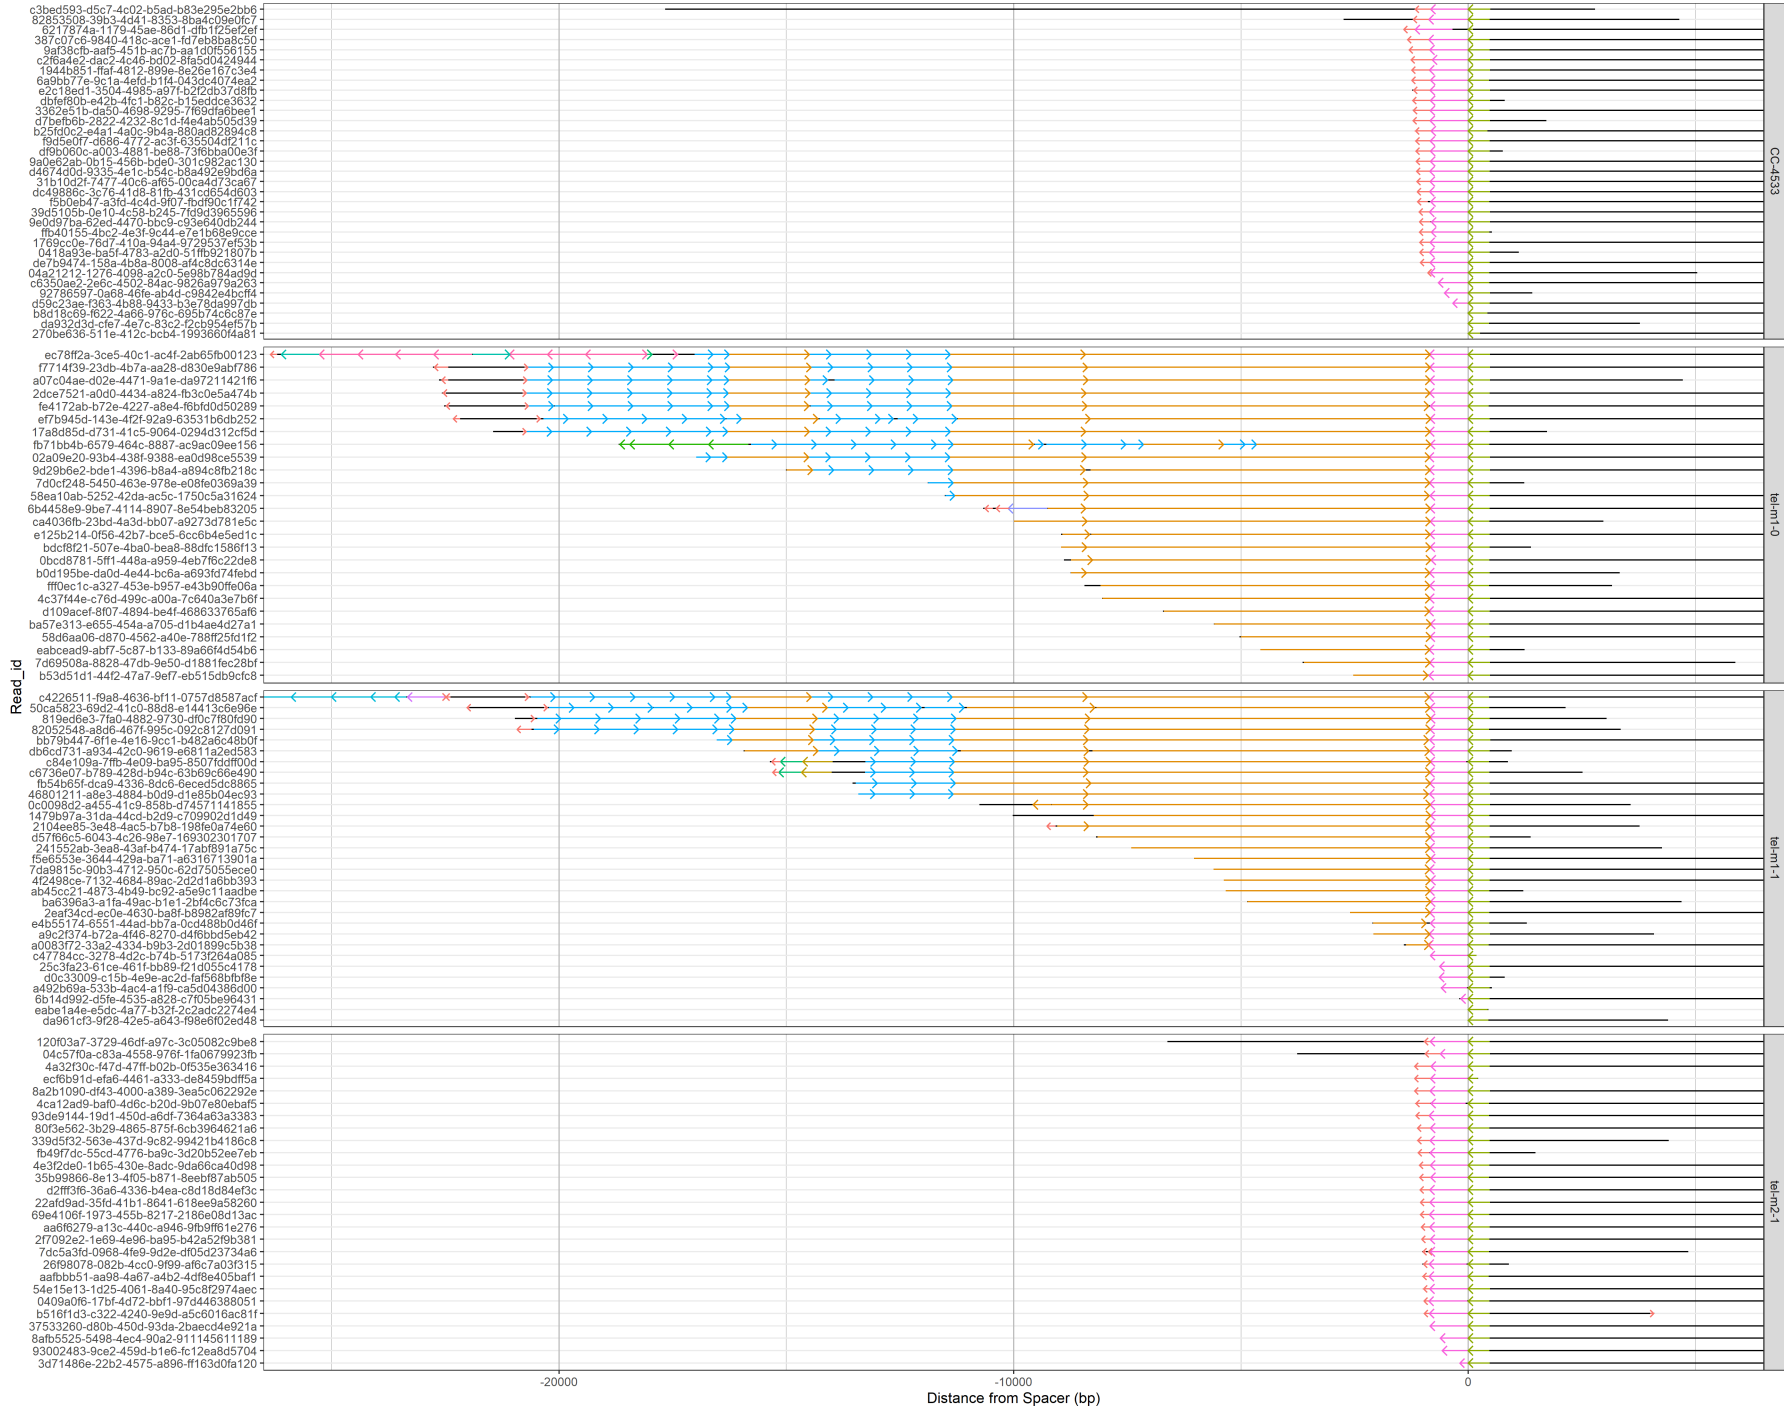

- Query
- 1. Telomere
  - rDNA
  - Spacer\_12\_L
  - Spacer\_6\_L
  - Sultan\_10\_L
  - Sultan\_12\_L
  - Sultan\_13\_R
  - Sultan\_15\_R
  - Sultan\_17\_R
  - Sultan\_3\_L
  - Sultan\_6\_L
  - Sultan\_7\_L

Spacer\_6\_R

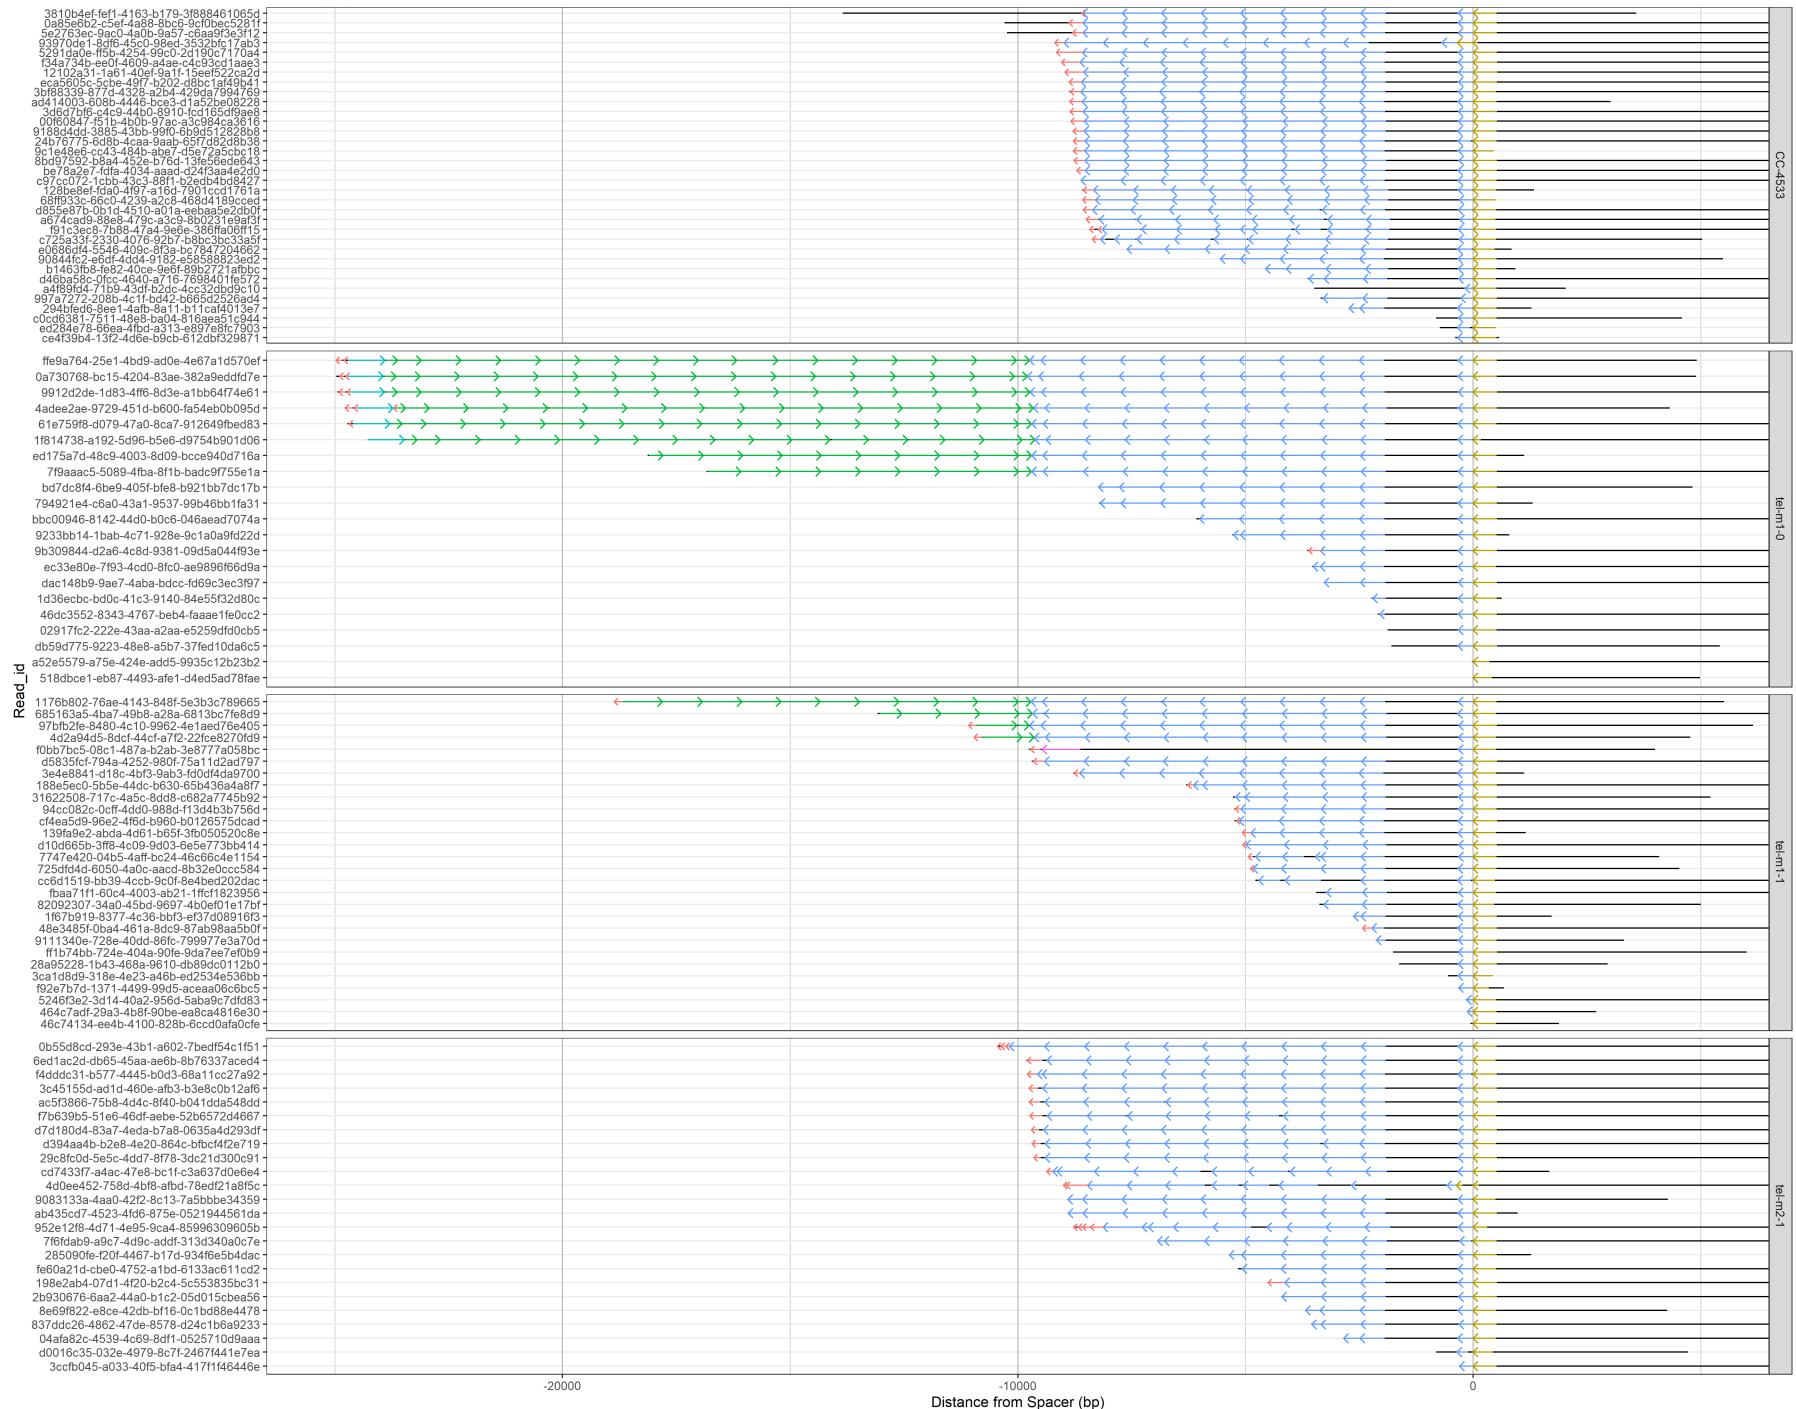



Spacer\_7\_L

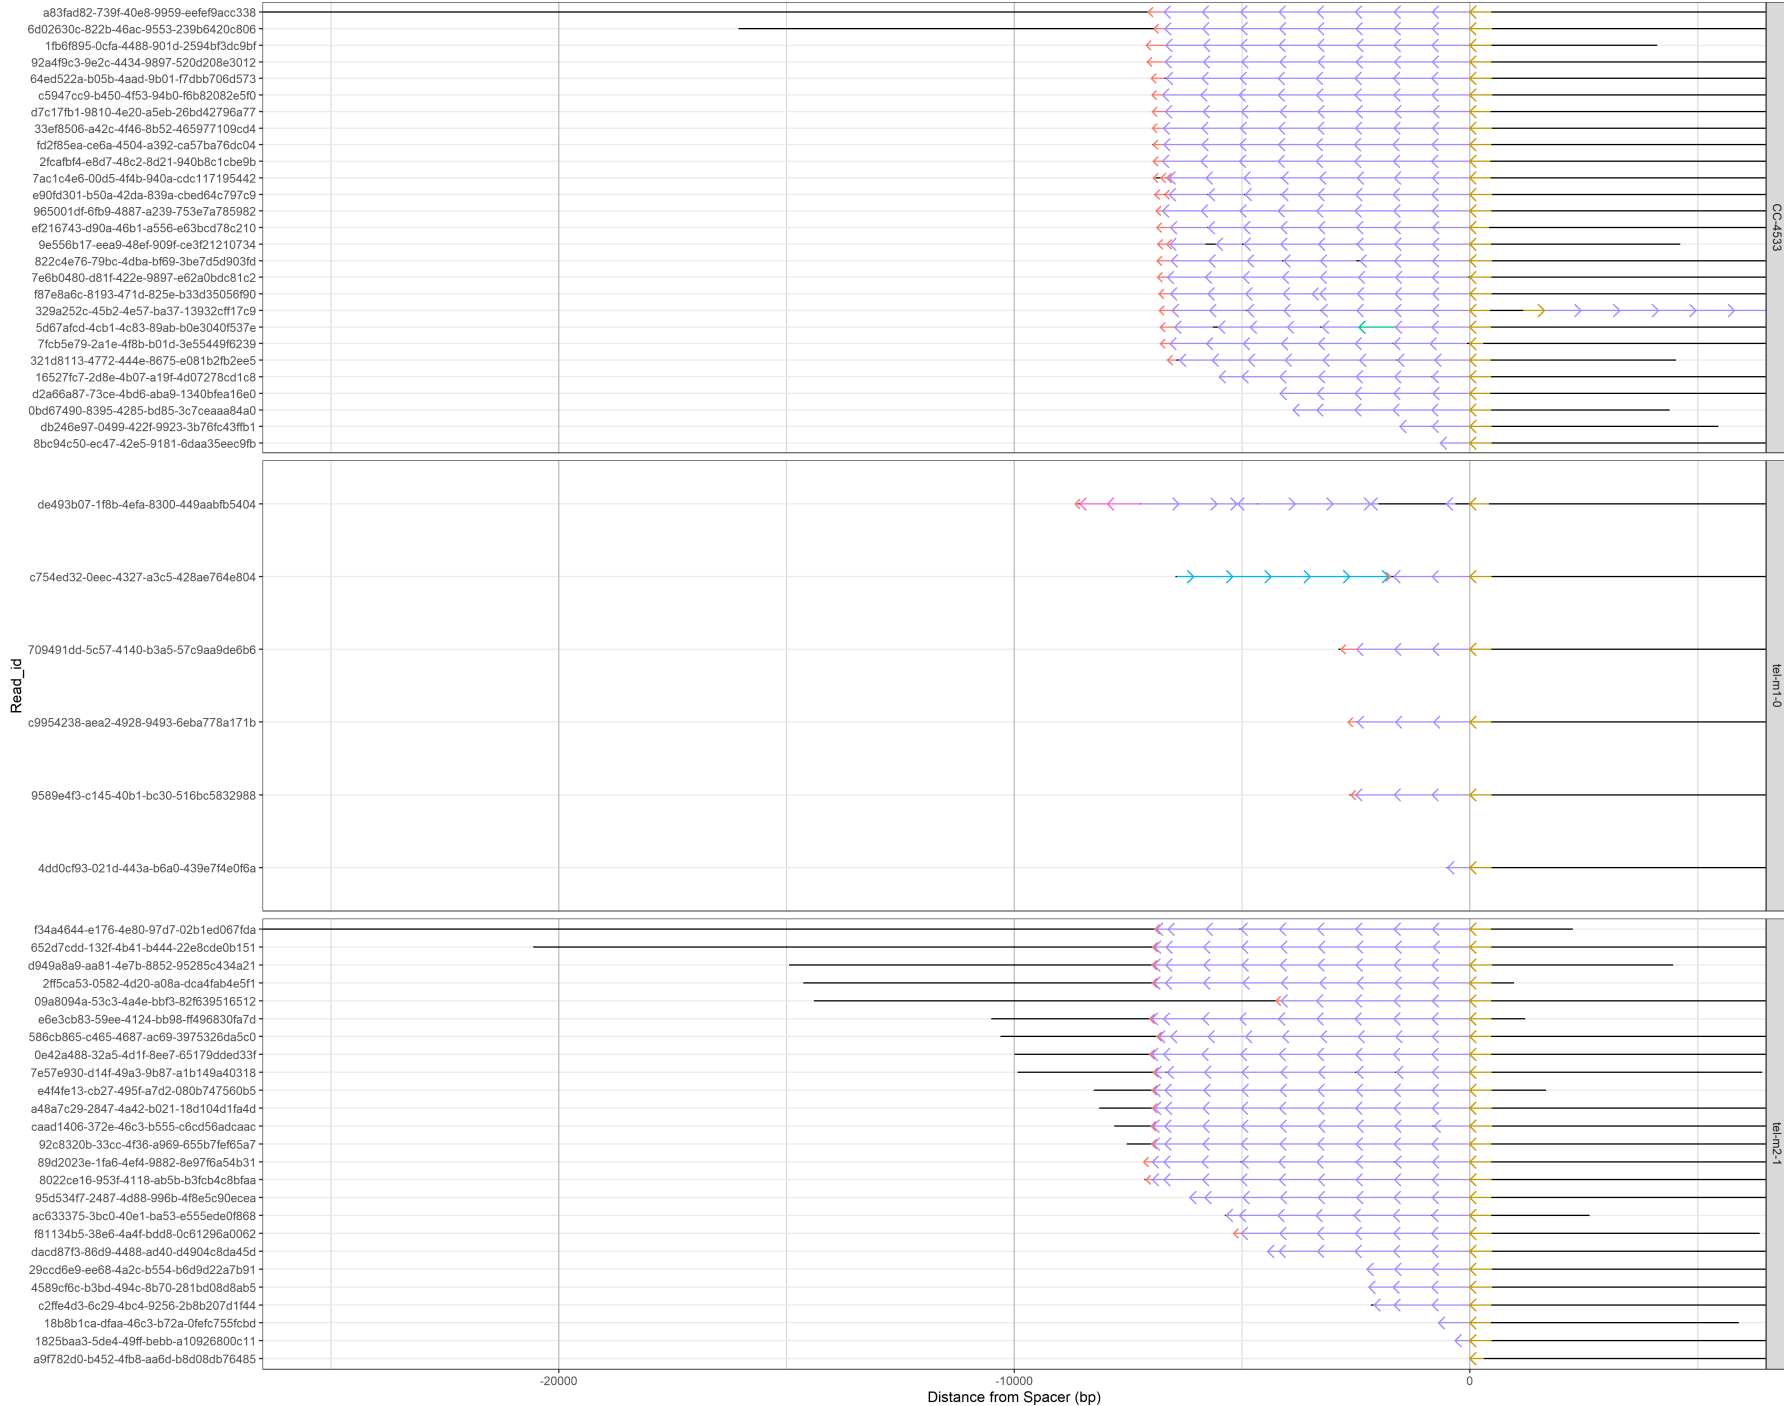

Spacer\_7\_R

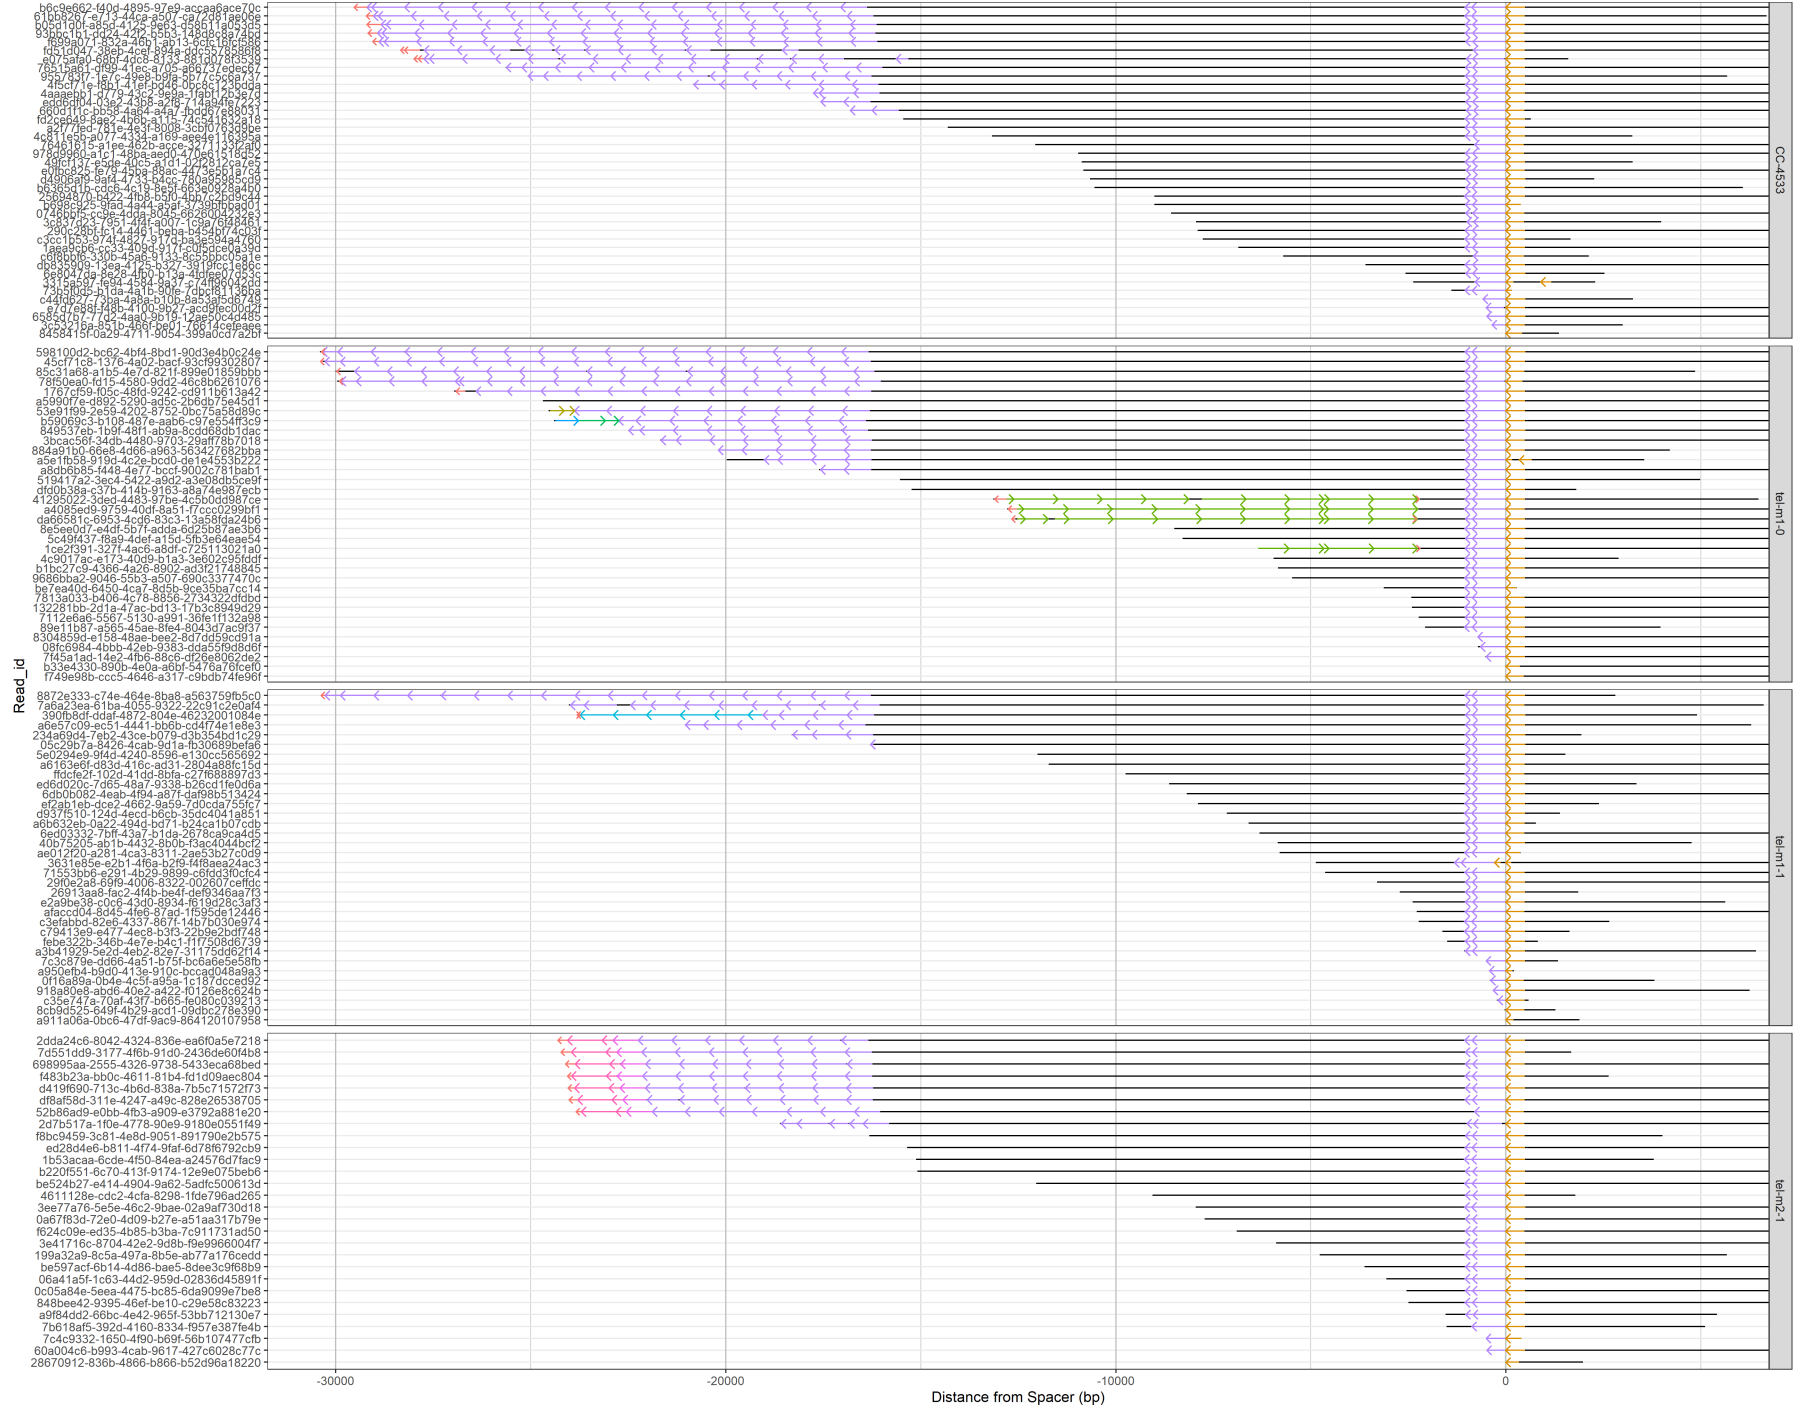

- Query
- 1. Telomere
  - Spacer\_7\_R
  - Suber\_1900
  - Sultan\_10\_R
  - Sultan\_12\_R
  - Sultan\_13\_L
  - Sultan\_5\_L
  - Sultan\_7\_R
  - Sultan\_8\_L
  - Sultan\_9\_R

CC-4533

tel-m1-0

tel-m1-1

tel-m2-1

Distance from Spacer (bp)

Spacer\_8\_L

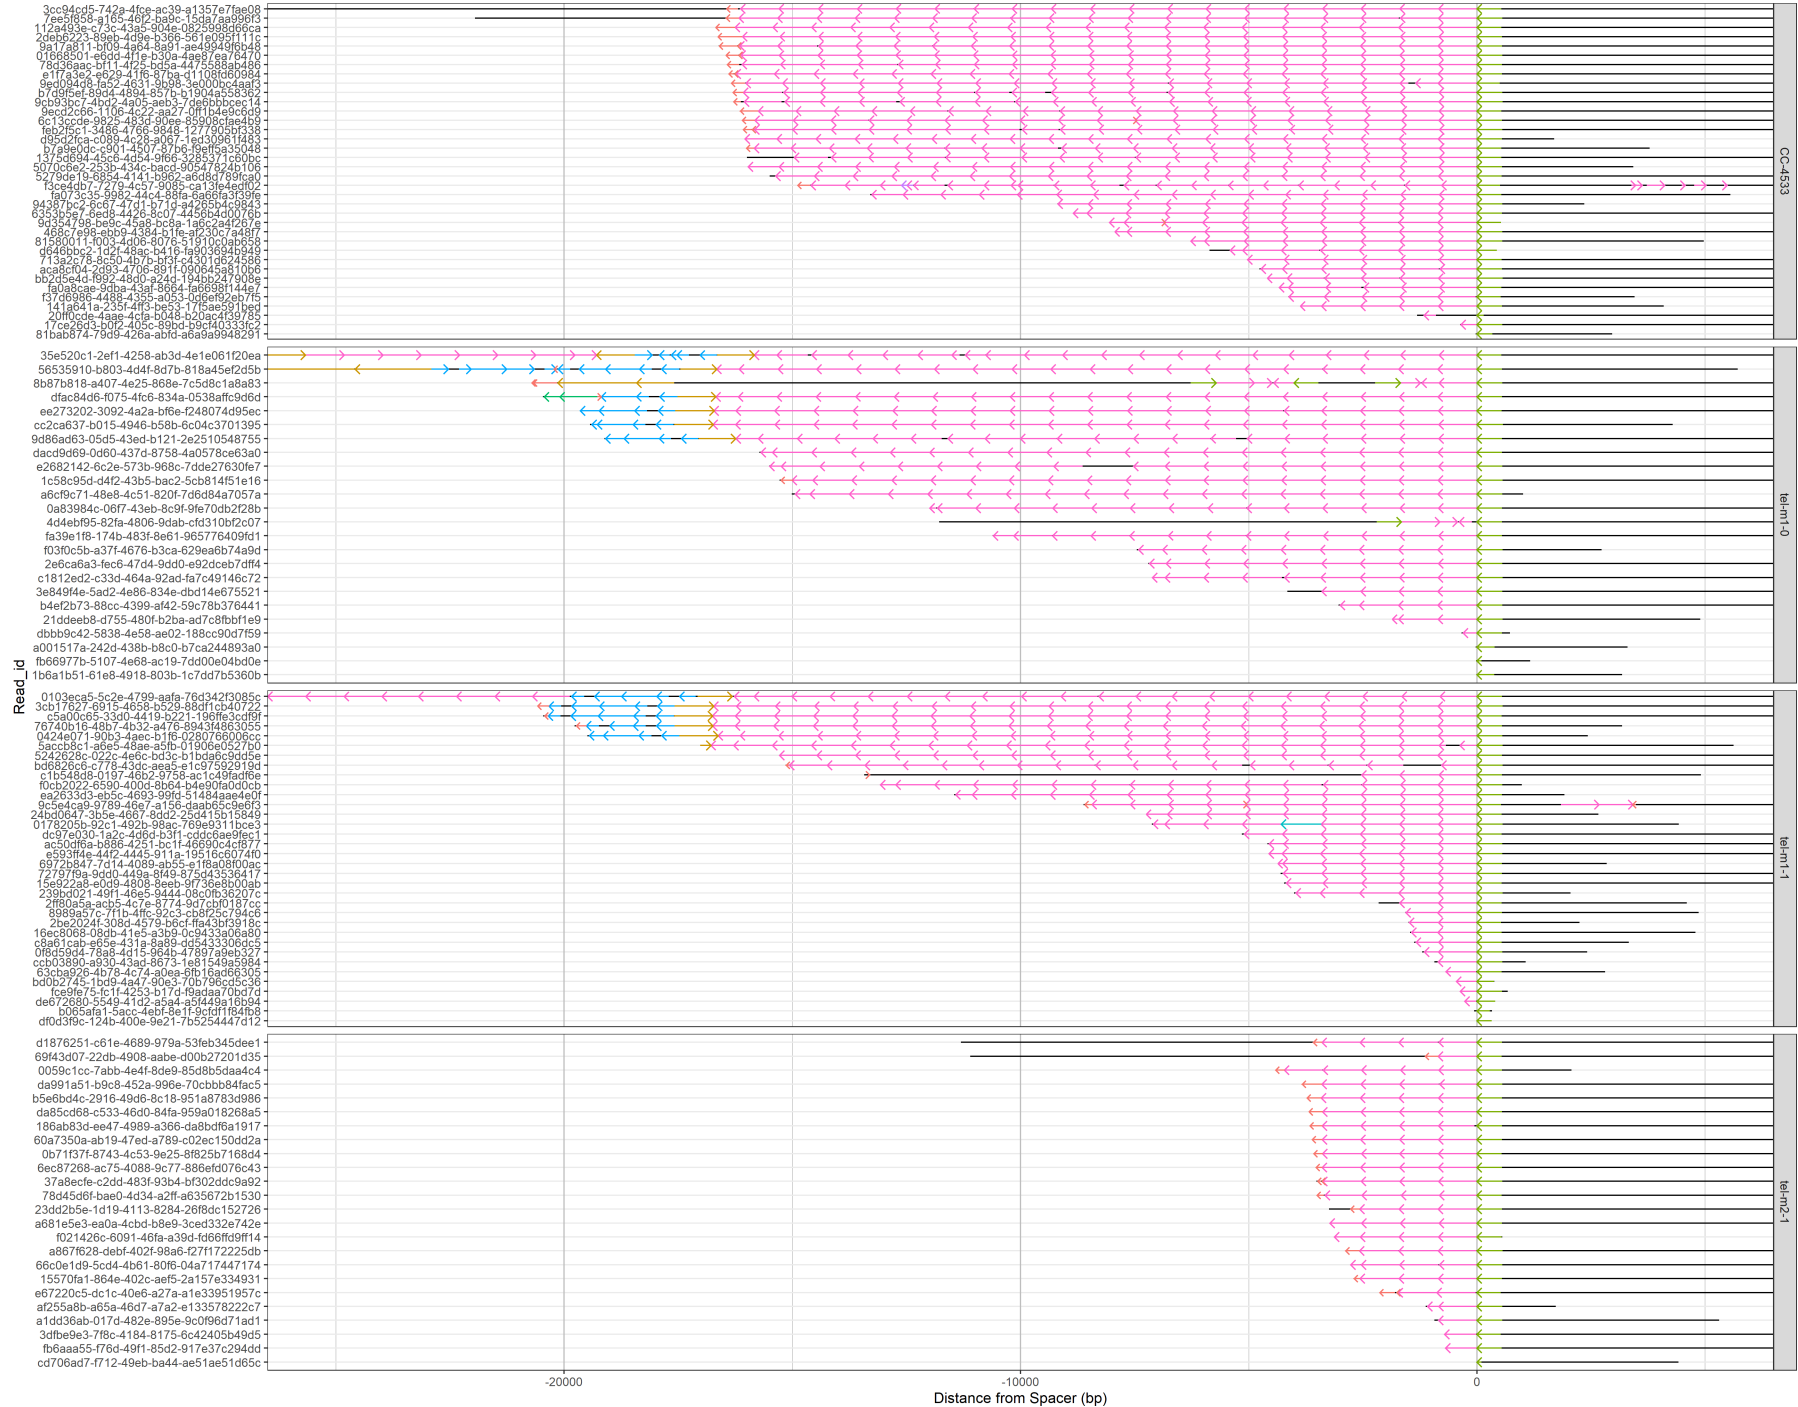

- Query
- 1. Telomere
  - rDNA
  - Spacer\_8\_L
  - Sultan\_2\_R
  - Sultan\_4\_L
  - Sultan\_4\_R
  - Sultan\_8\_L

-20000 -10000 0  
Distance from Spacer (bp)

Spacer\_9\_L

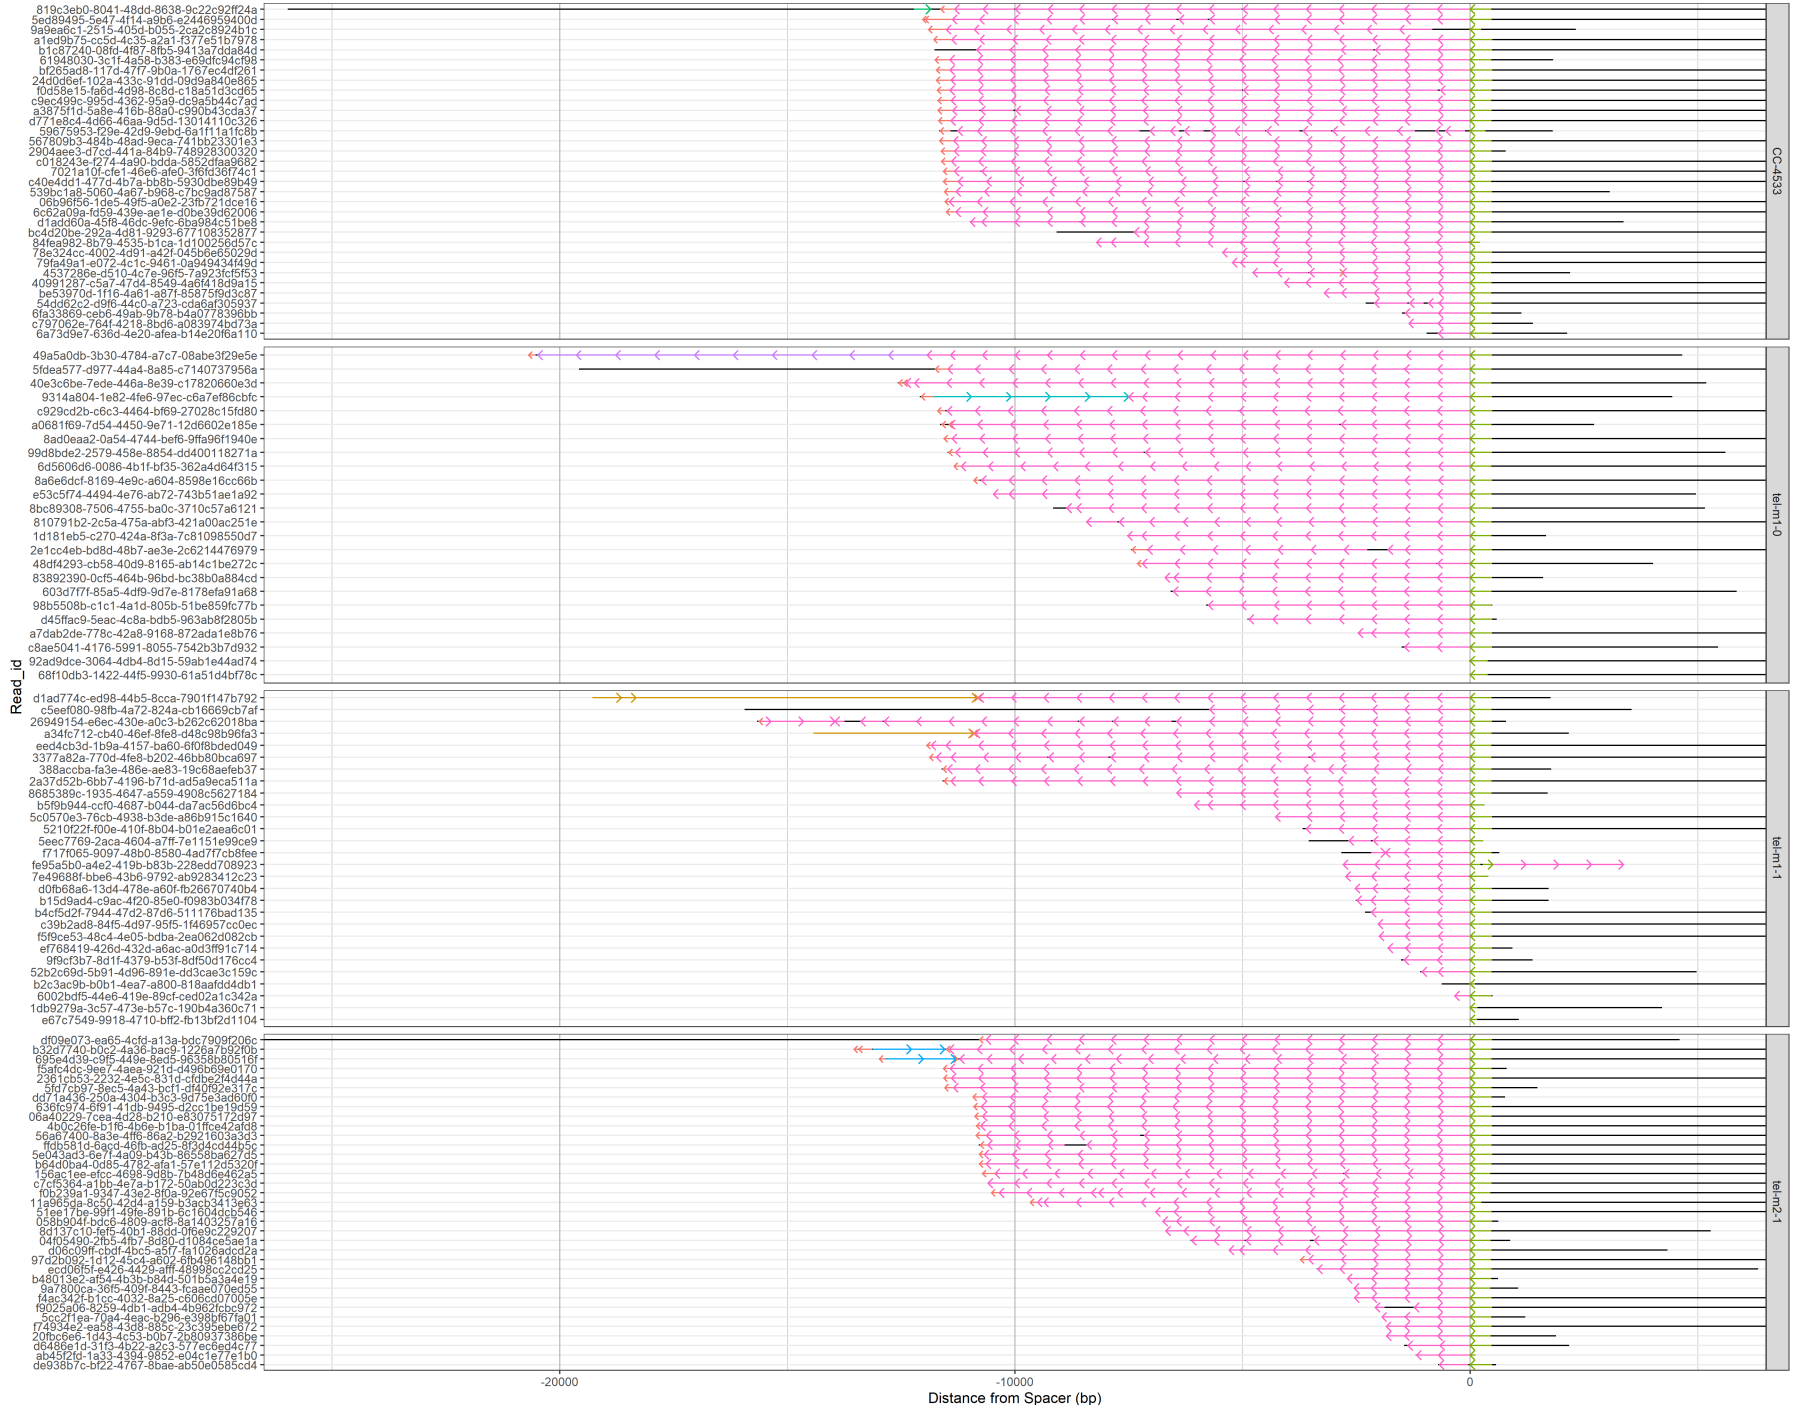

-20000

-10000

0

Spacer\_9\_R

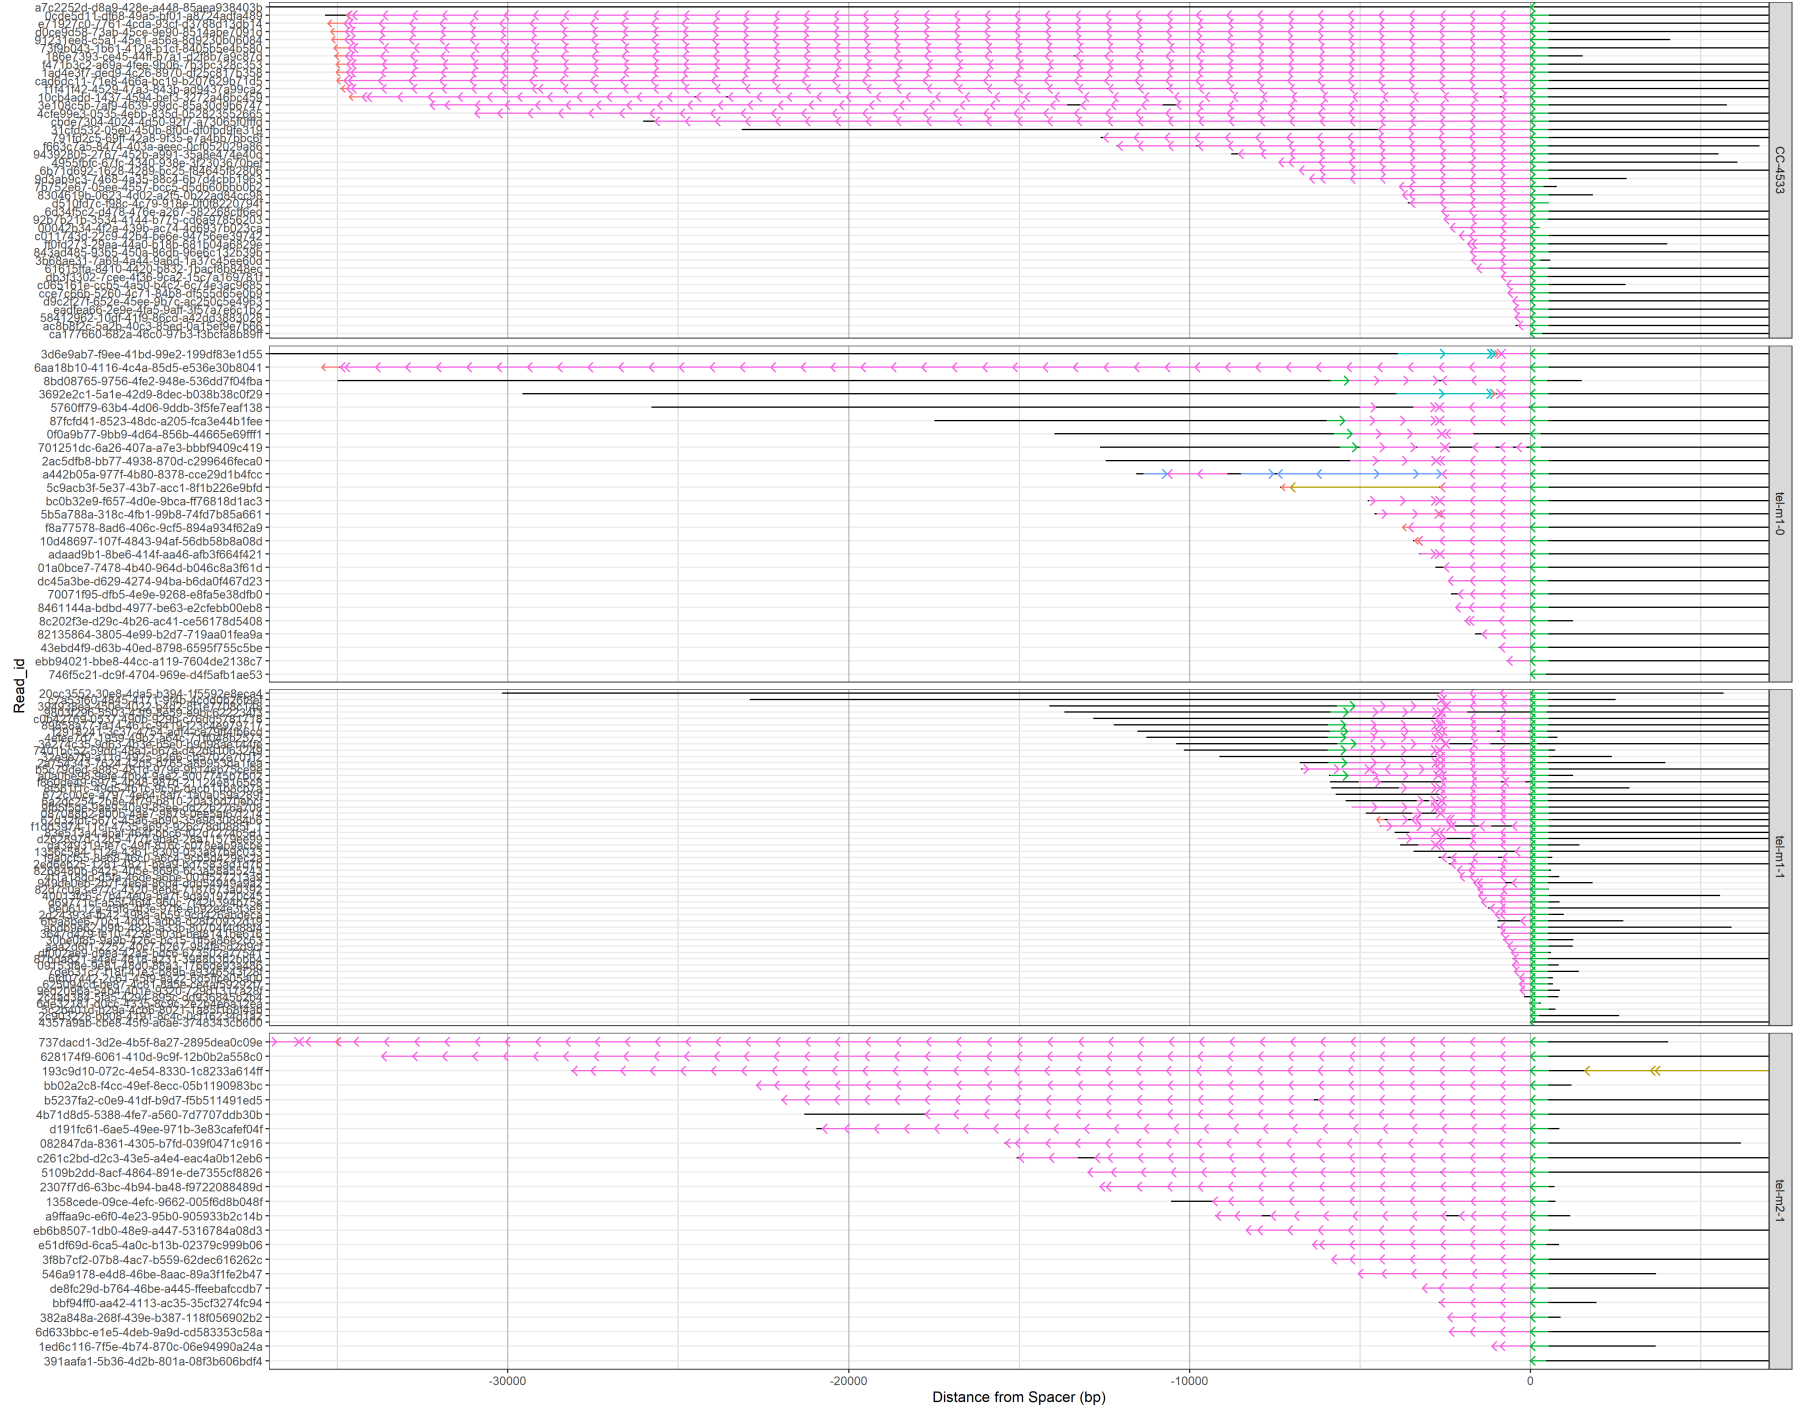

- Query
- 1. Telomere
  - rDNA
  - Spacer\_9\_R
  - Sultan\_11\_R
  - Sultan\_5\_L
  - Sultan\_9\_R

Distance from Spacer (bp)



Spacer\_10\_L

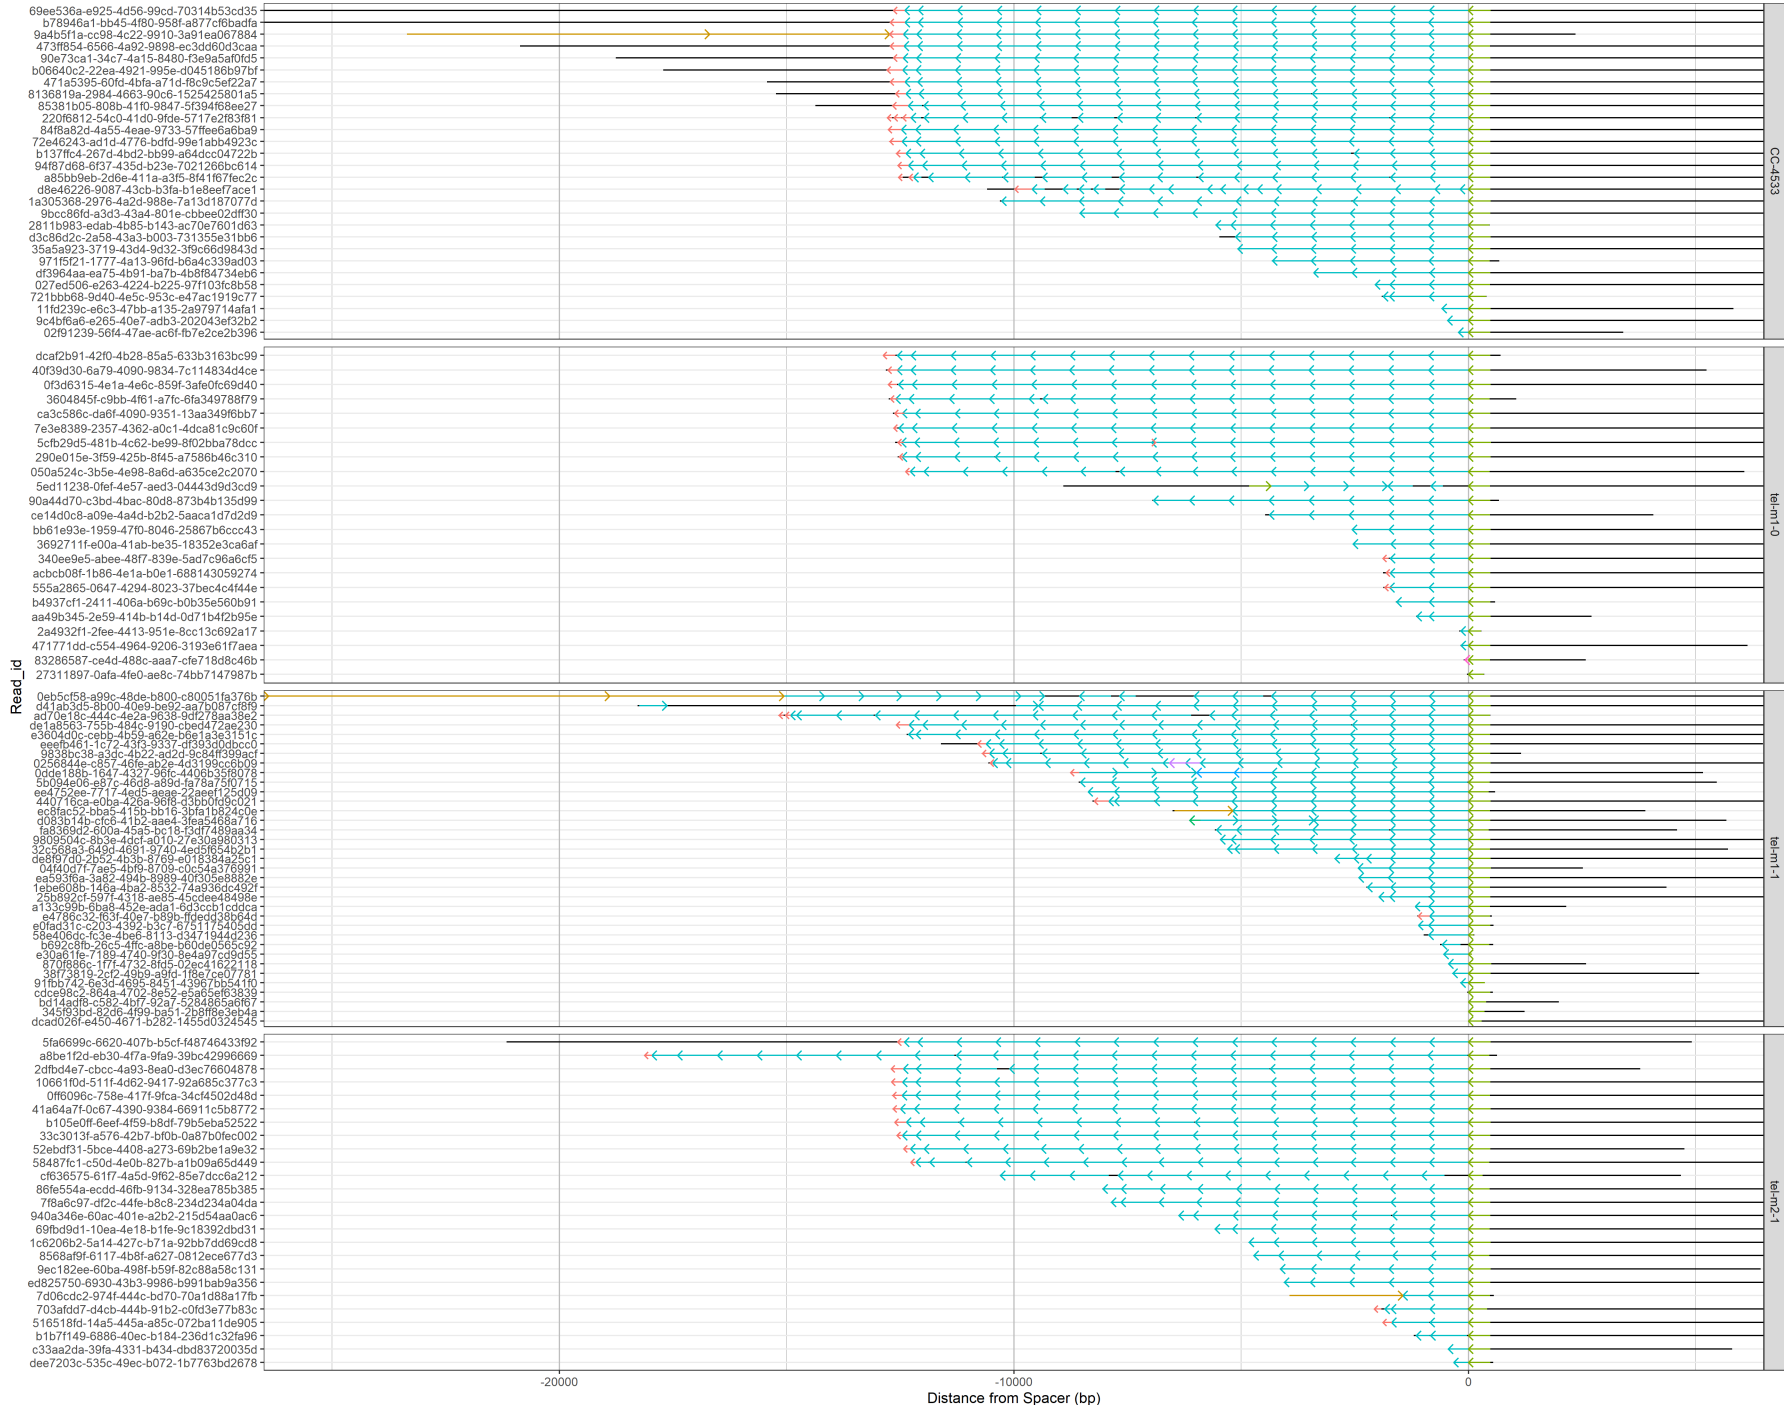

- Query
- 1. Telomere
  - rDNA
  - Spacer\_10\_L
  - Suber\_1500
  - Sultan\_10\_L
  - Sultan\_12\_R
  - Sultan\_16\_L
  - Sultan\_4\_L

-20000

-10000

0

Distance from Spacer (bp)

Spacer\_10\_R

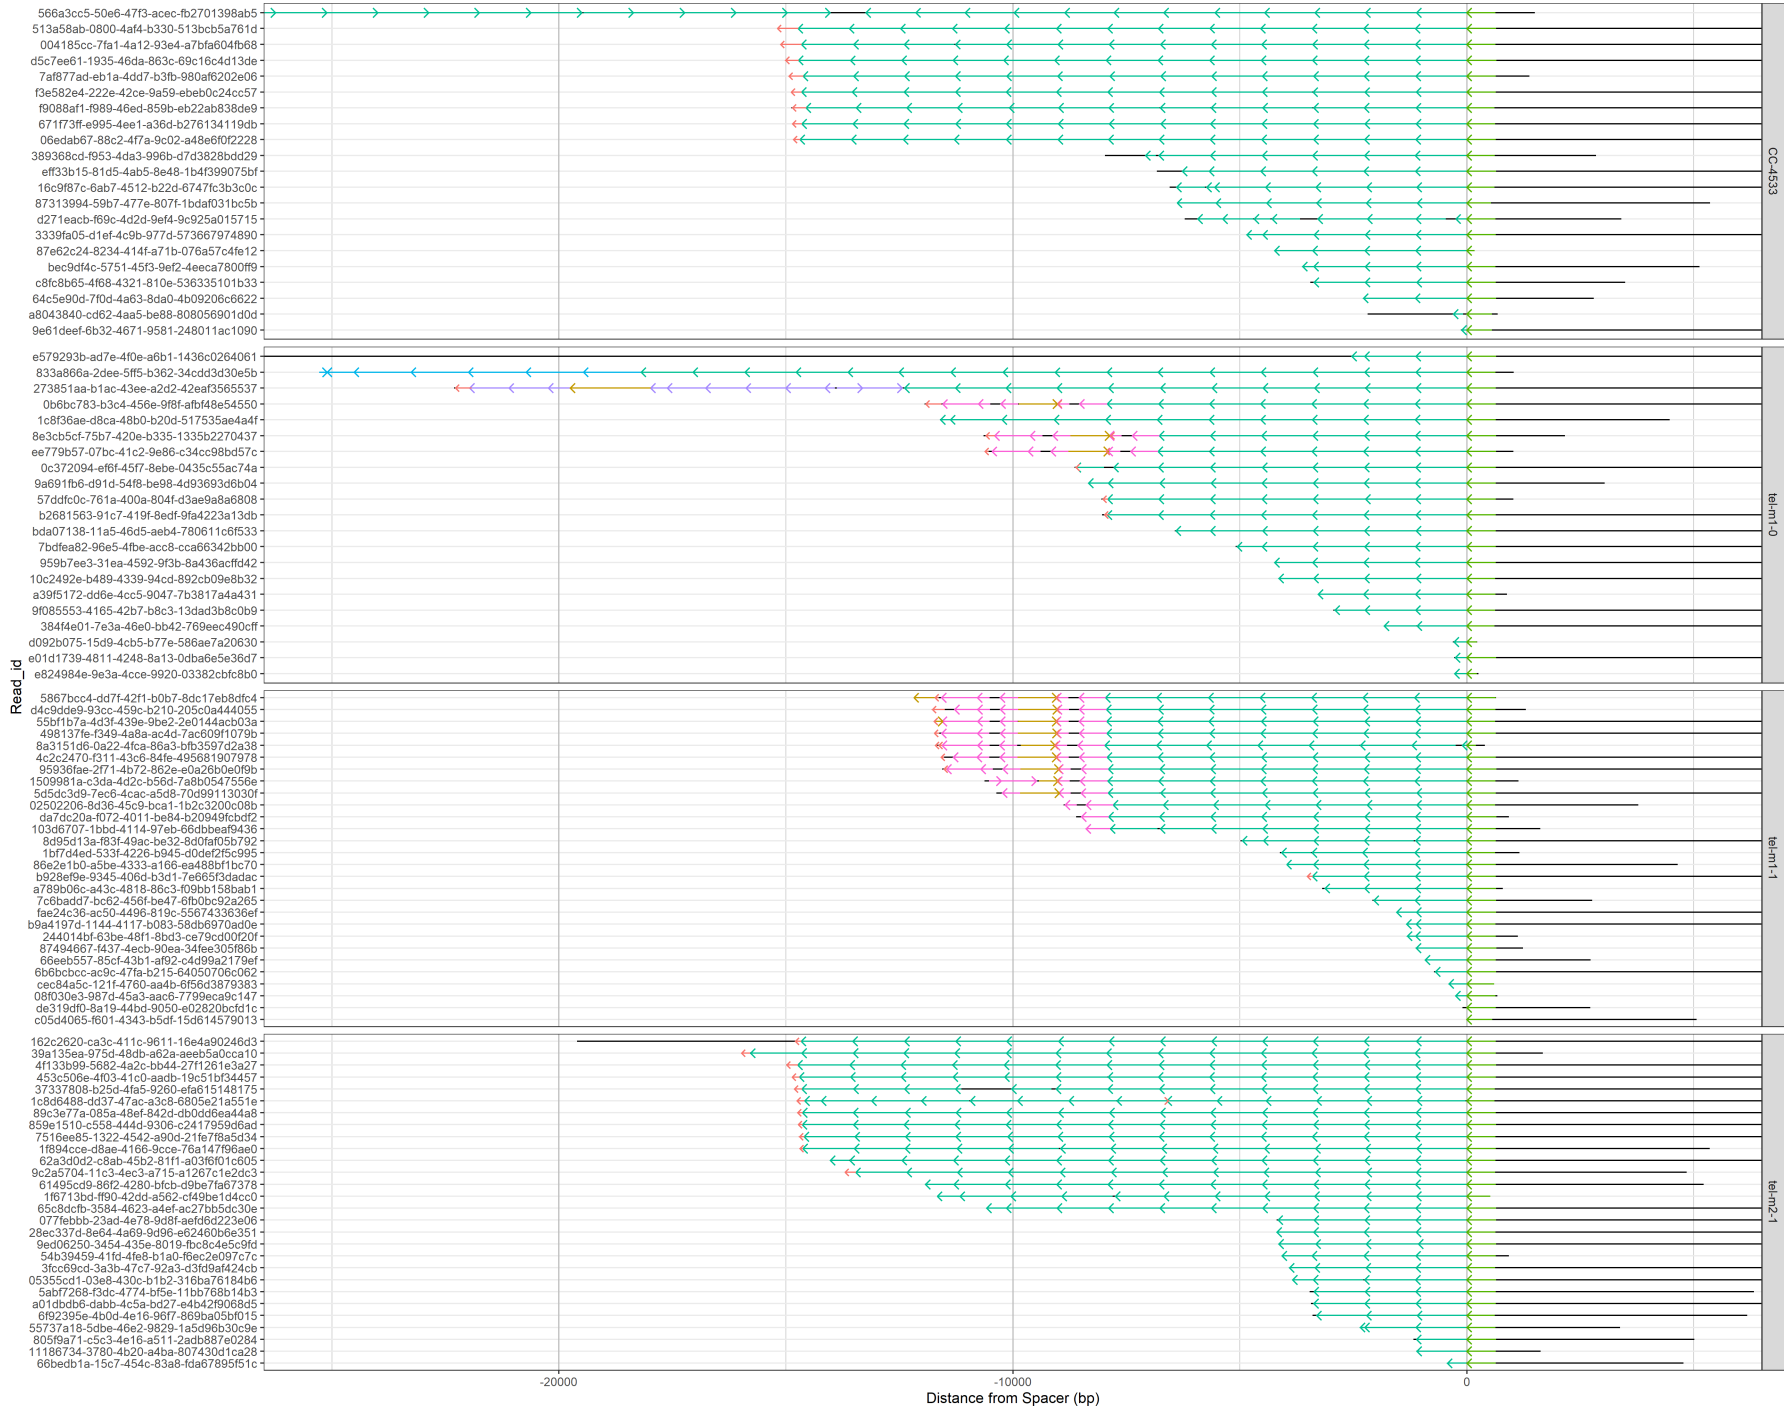

Spacer\_11\_R

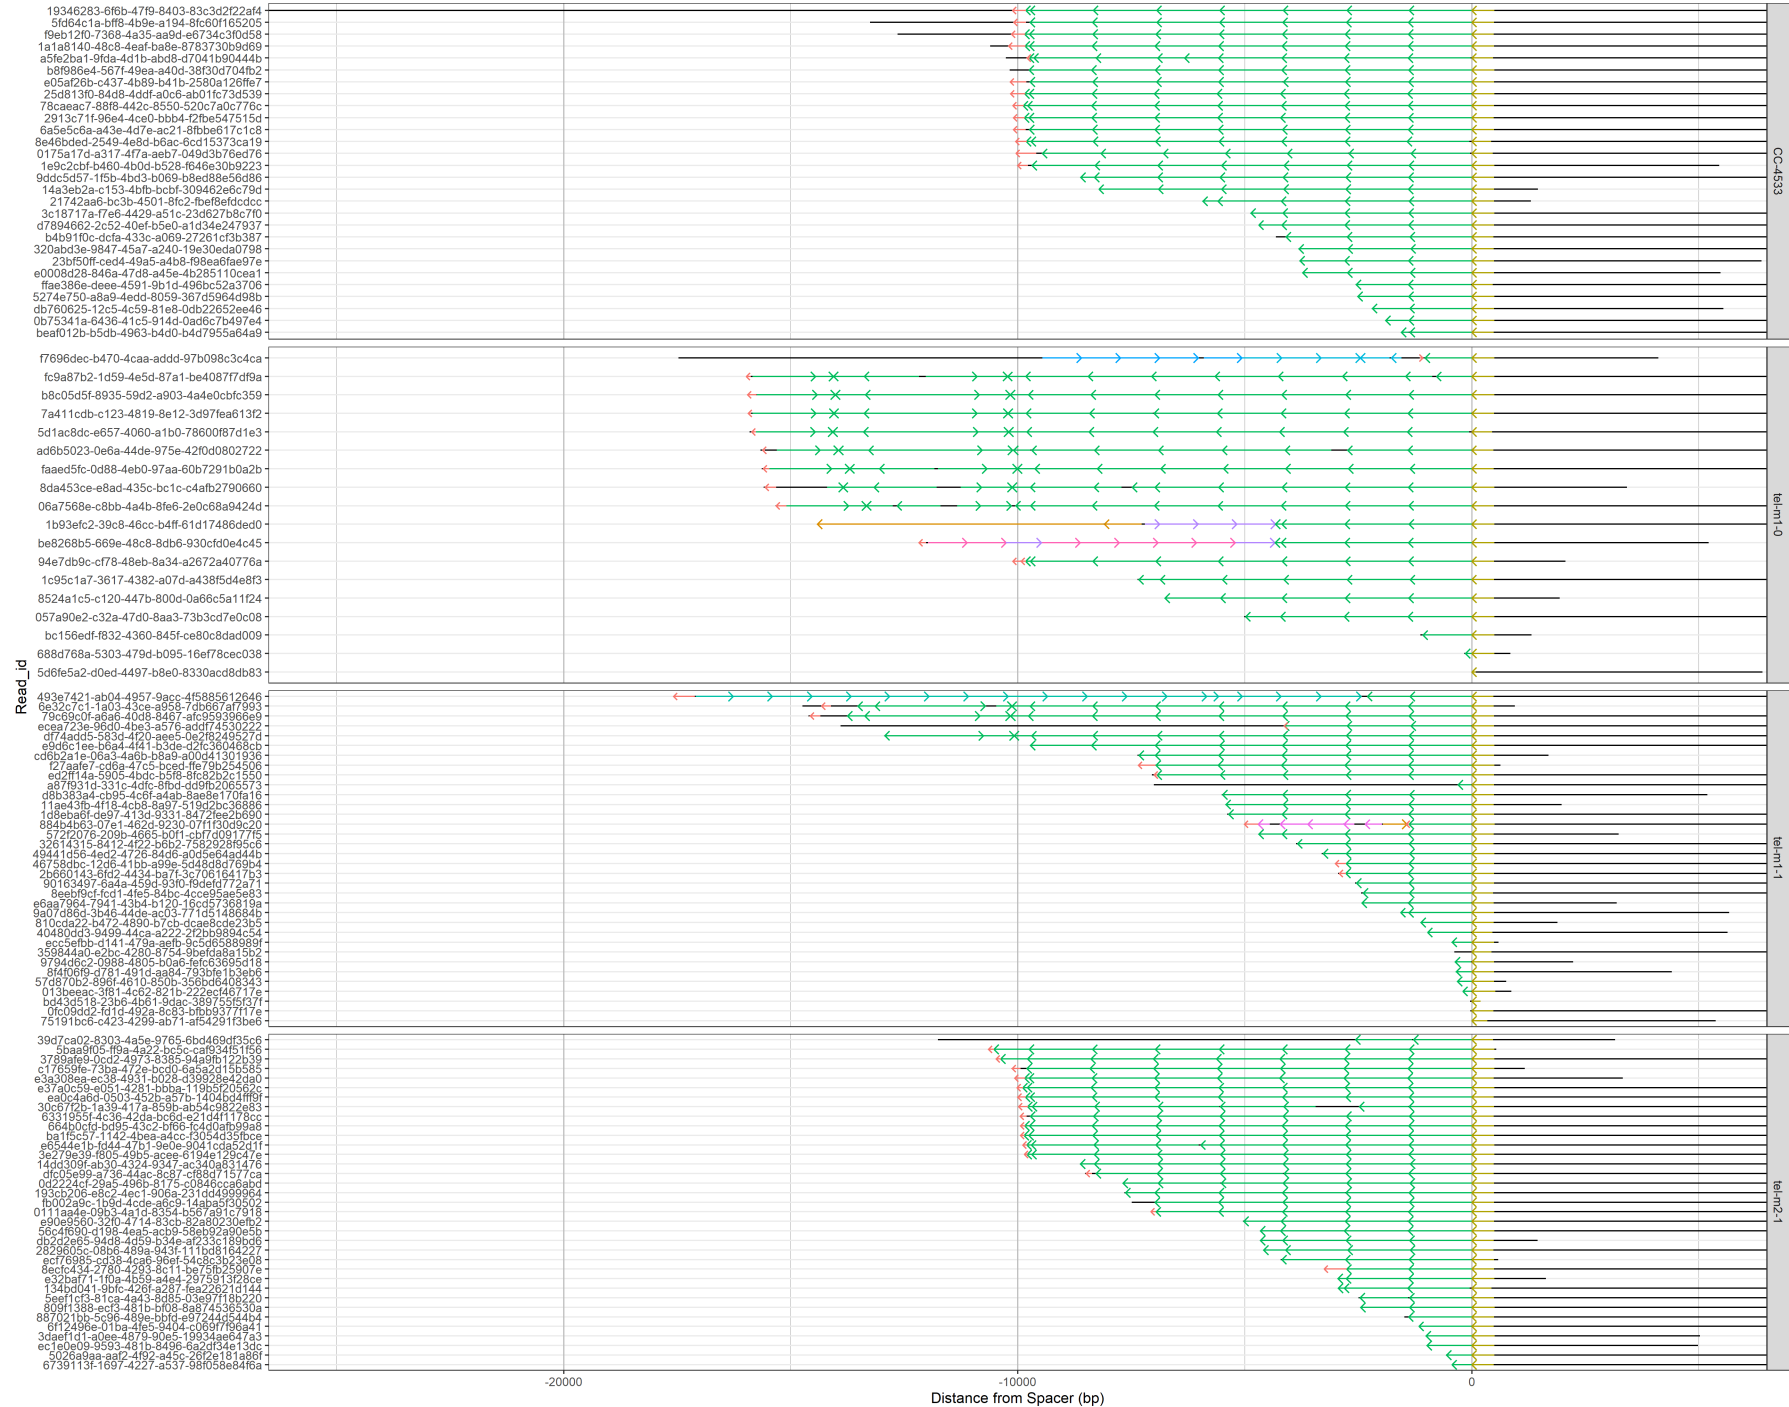

- Query
- 1. Telomere
  - rDNA
  - Spacer\_11\_R
  - Sultan\_10\_R
  - Sultan\_11\_R
  - Sultan\_13\_R
  - Sultan\_15\_R
  - Sultan\_2\_L
  - Sultan\_2\_R
  - Sultan\_4\_L
  - Sultan\_8\_L

-20000

-10000

0

Spacer\_12\_L

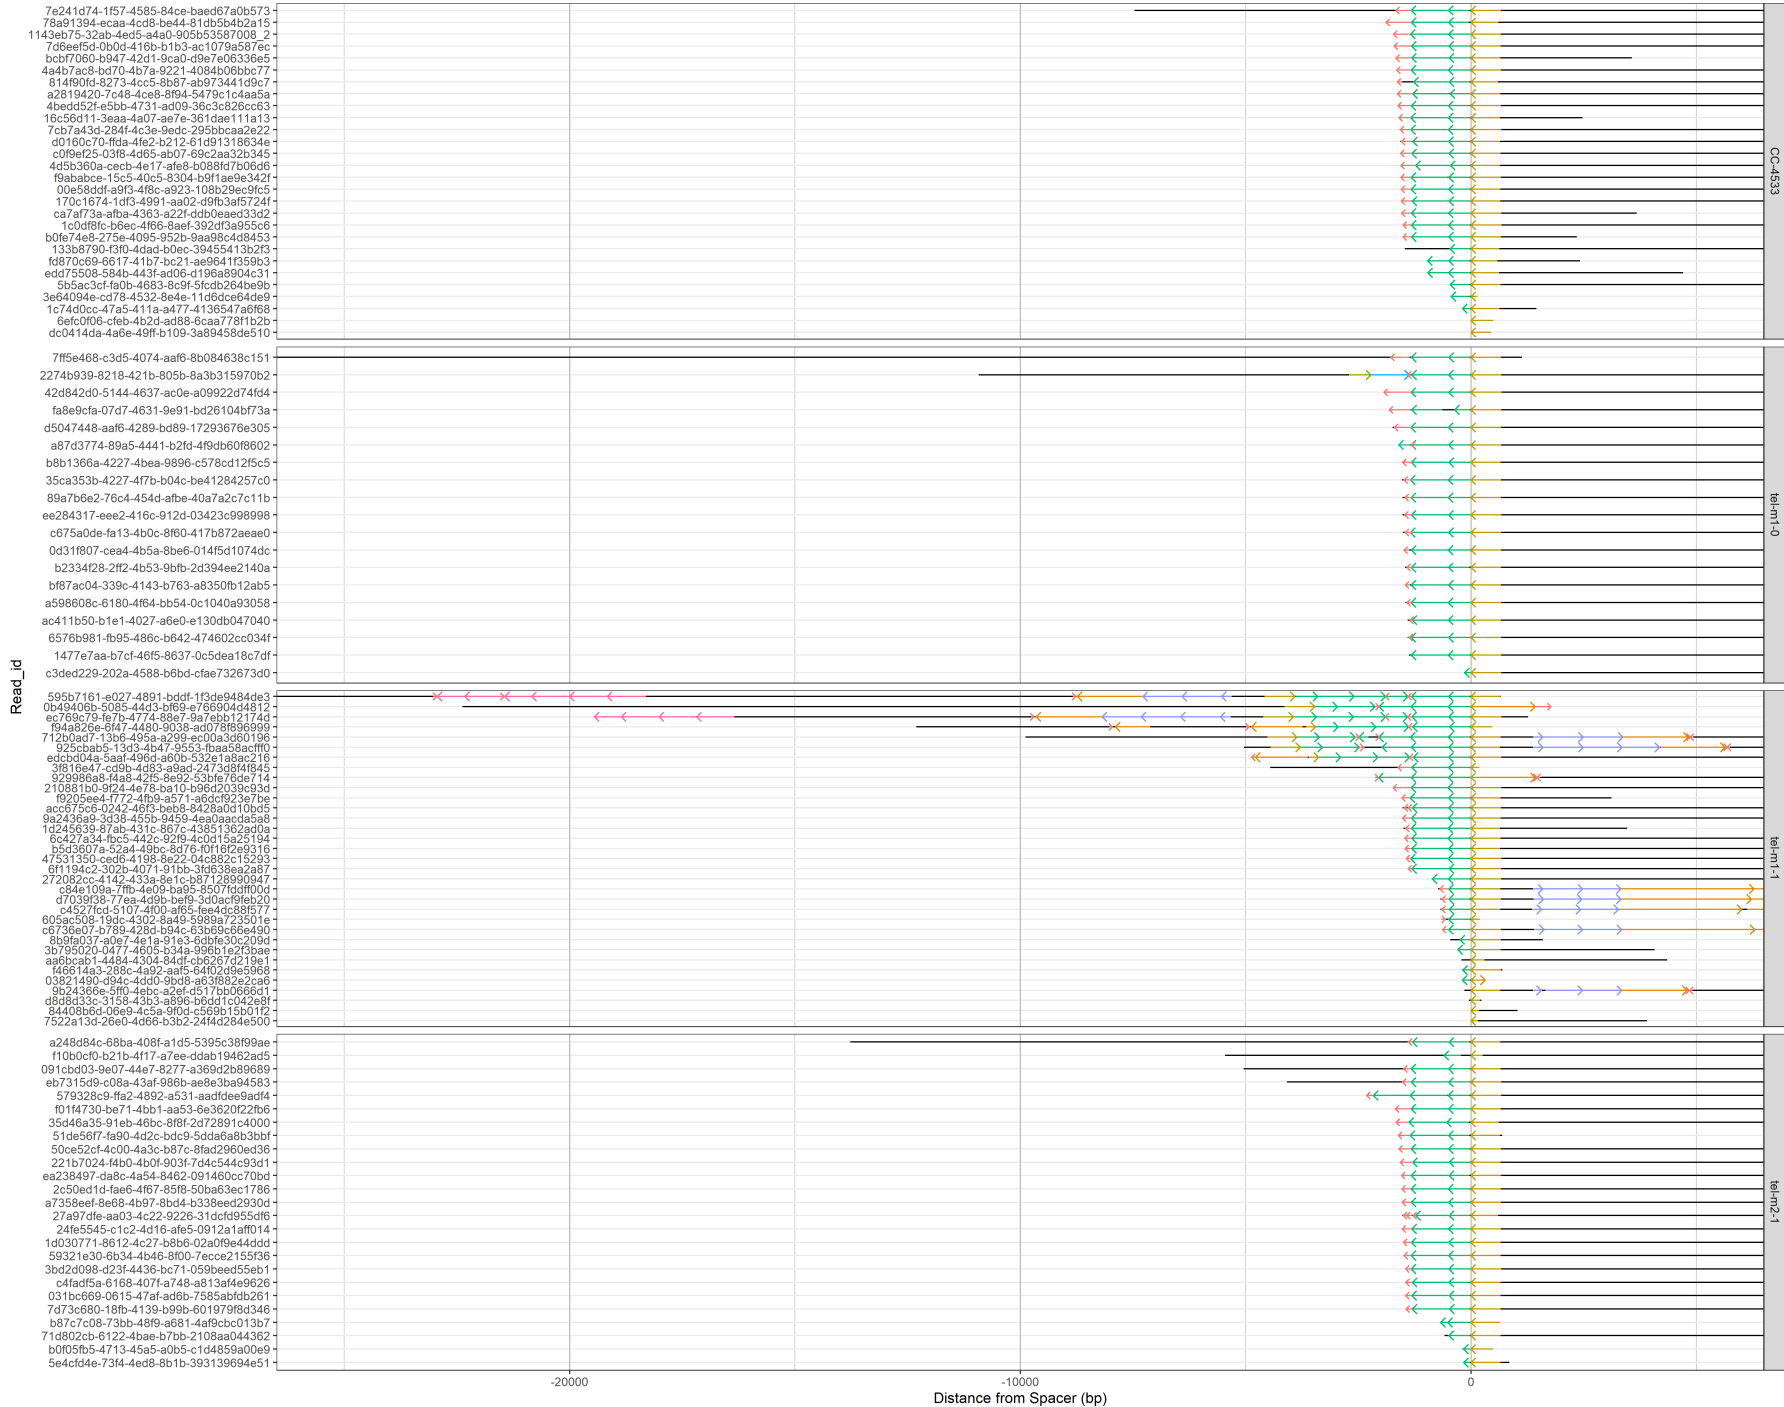

- Query
- 1. Telomere
  - rDNA
  - Spacer\_12\_L
  - Spacer\_15\_L
  - Spacer\_6\_L
  - Sultan\_12\_L
  - Sultan\_12\_R
  - Sultan\_14\_L
  - Sultan\_15\_L
  - Sultan\_15\_R
  - Sultan\_5\_R
  - Sultan\_6\_L
  - Sultan\_7\_L

Spacer\_12\_R

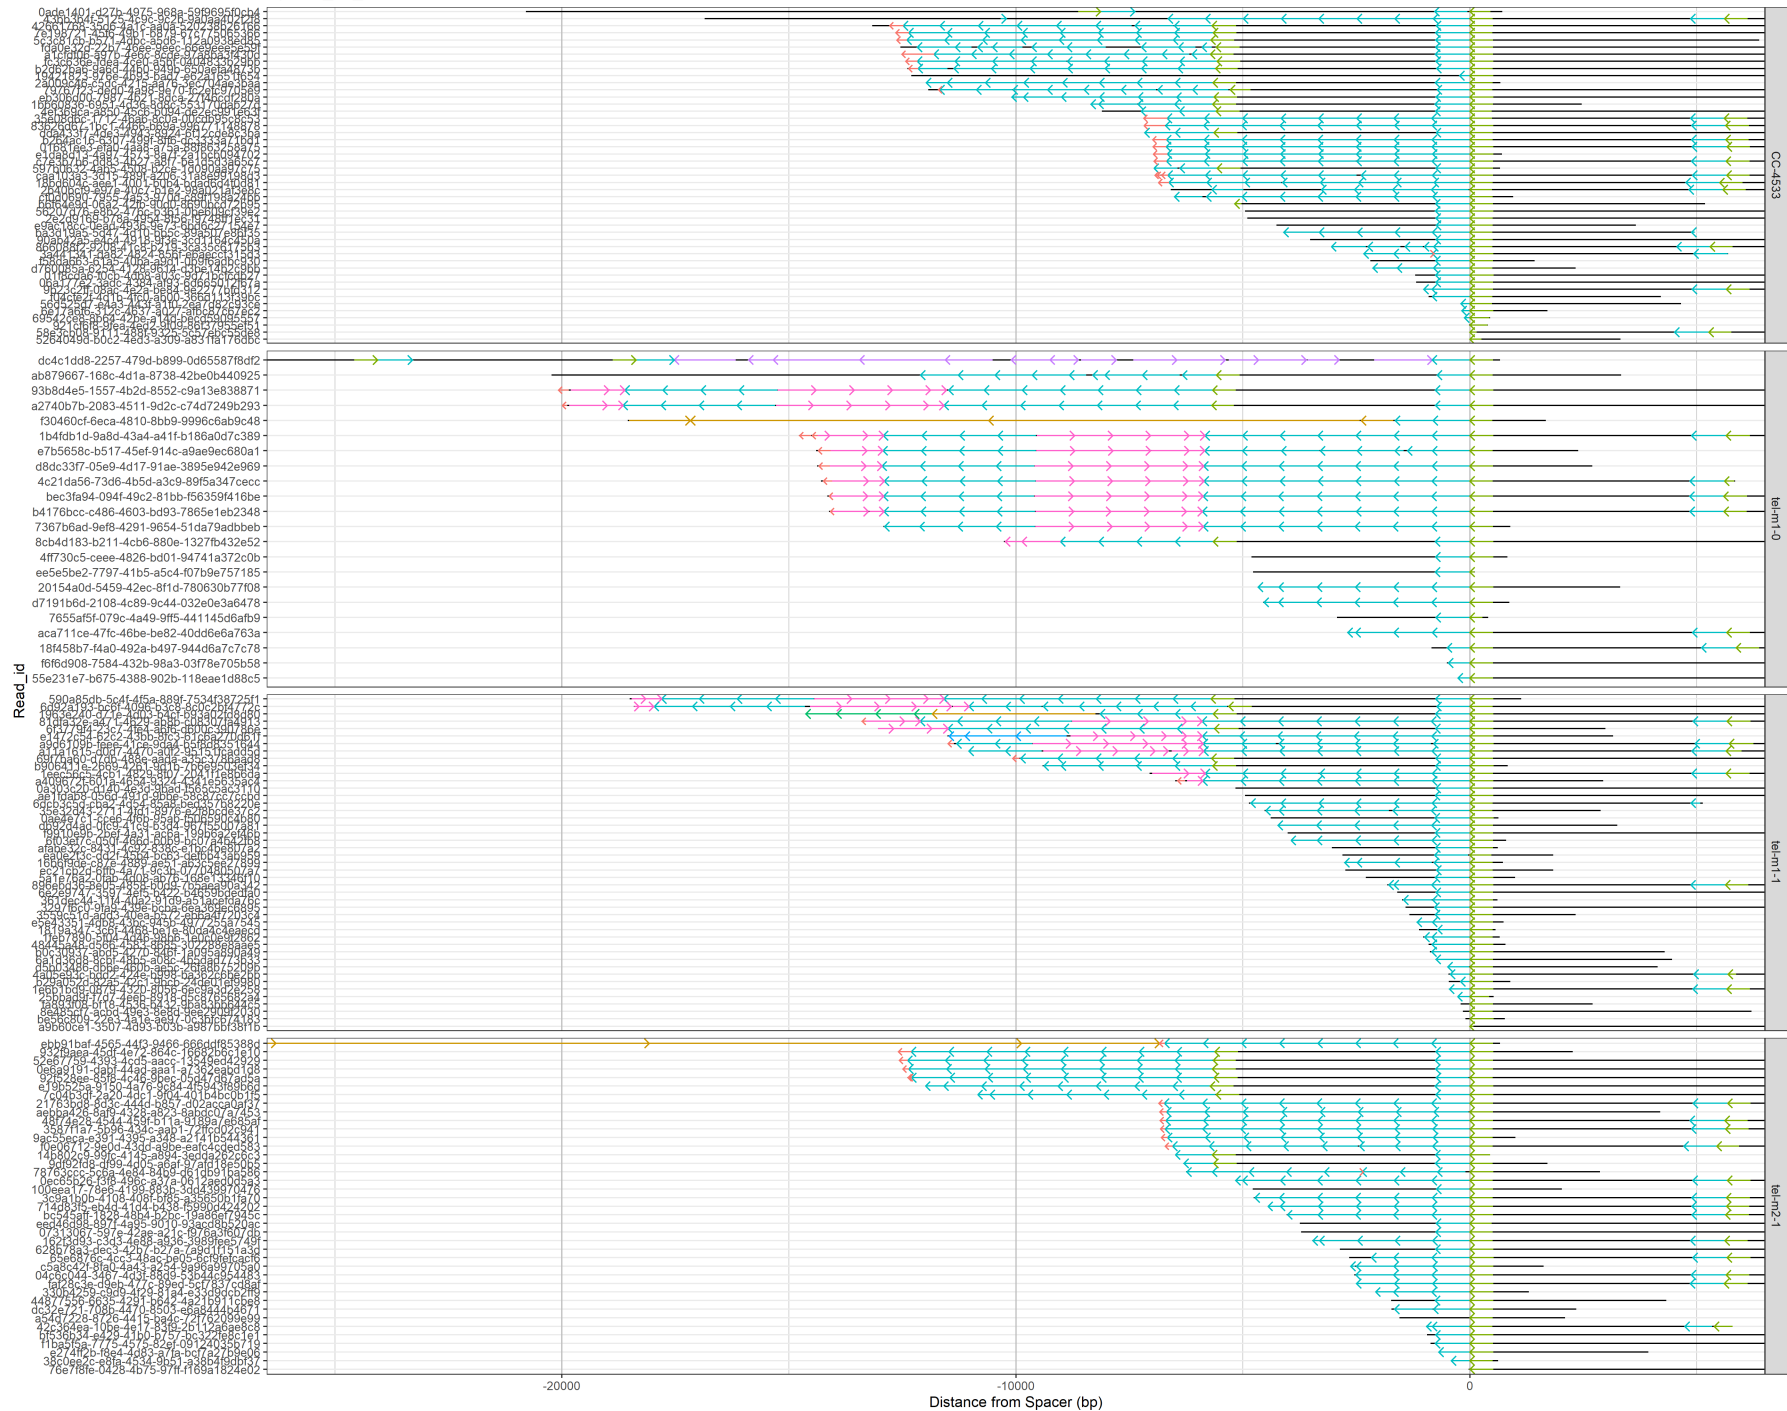

- Query
- 1. Telomere
  - rDNA
  - Spacer\_12\_R
  - Sultan\_10\_L
  - Sultan\_12\_R
  - Sultan\_5\_L
  - Sultan\_5\_R
  - Sultan\_7\_L



Spacer\_13\_L

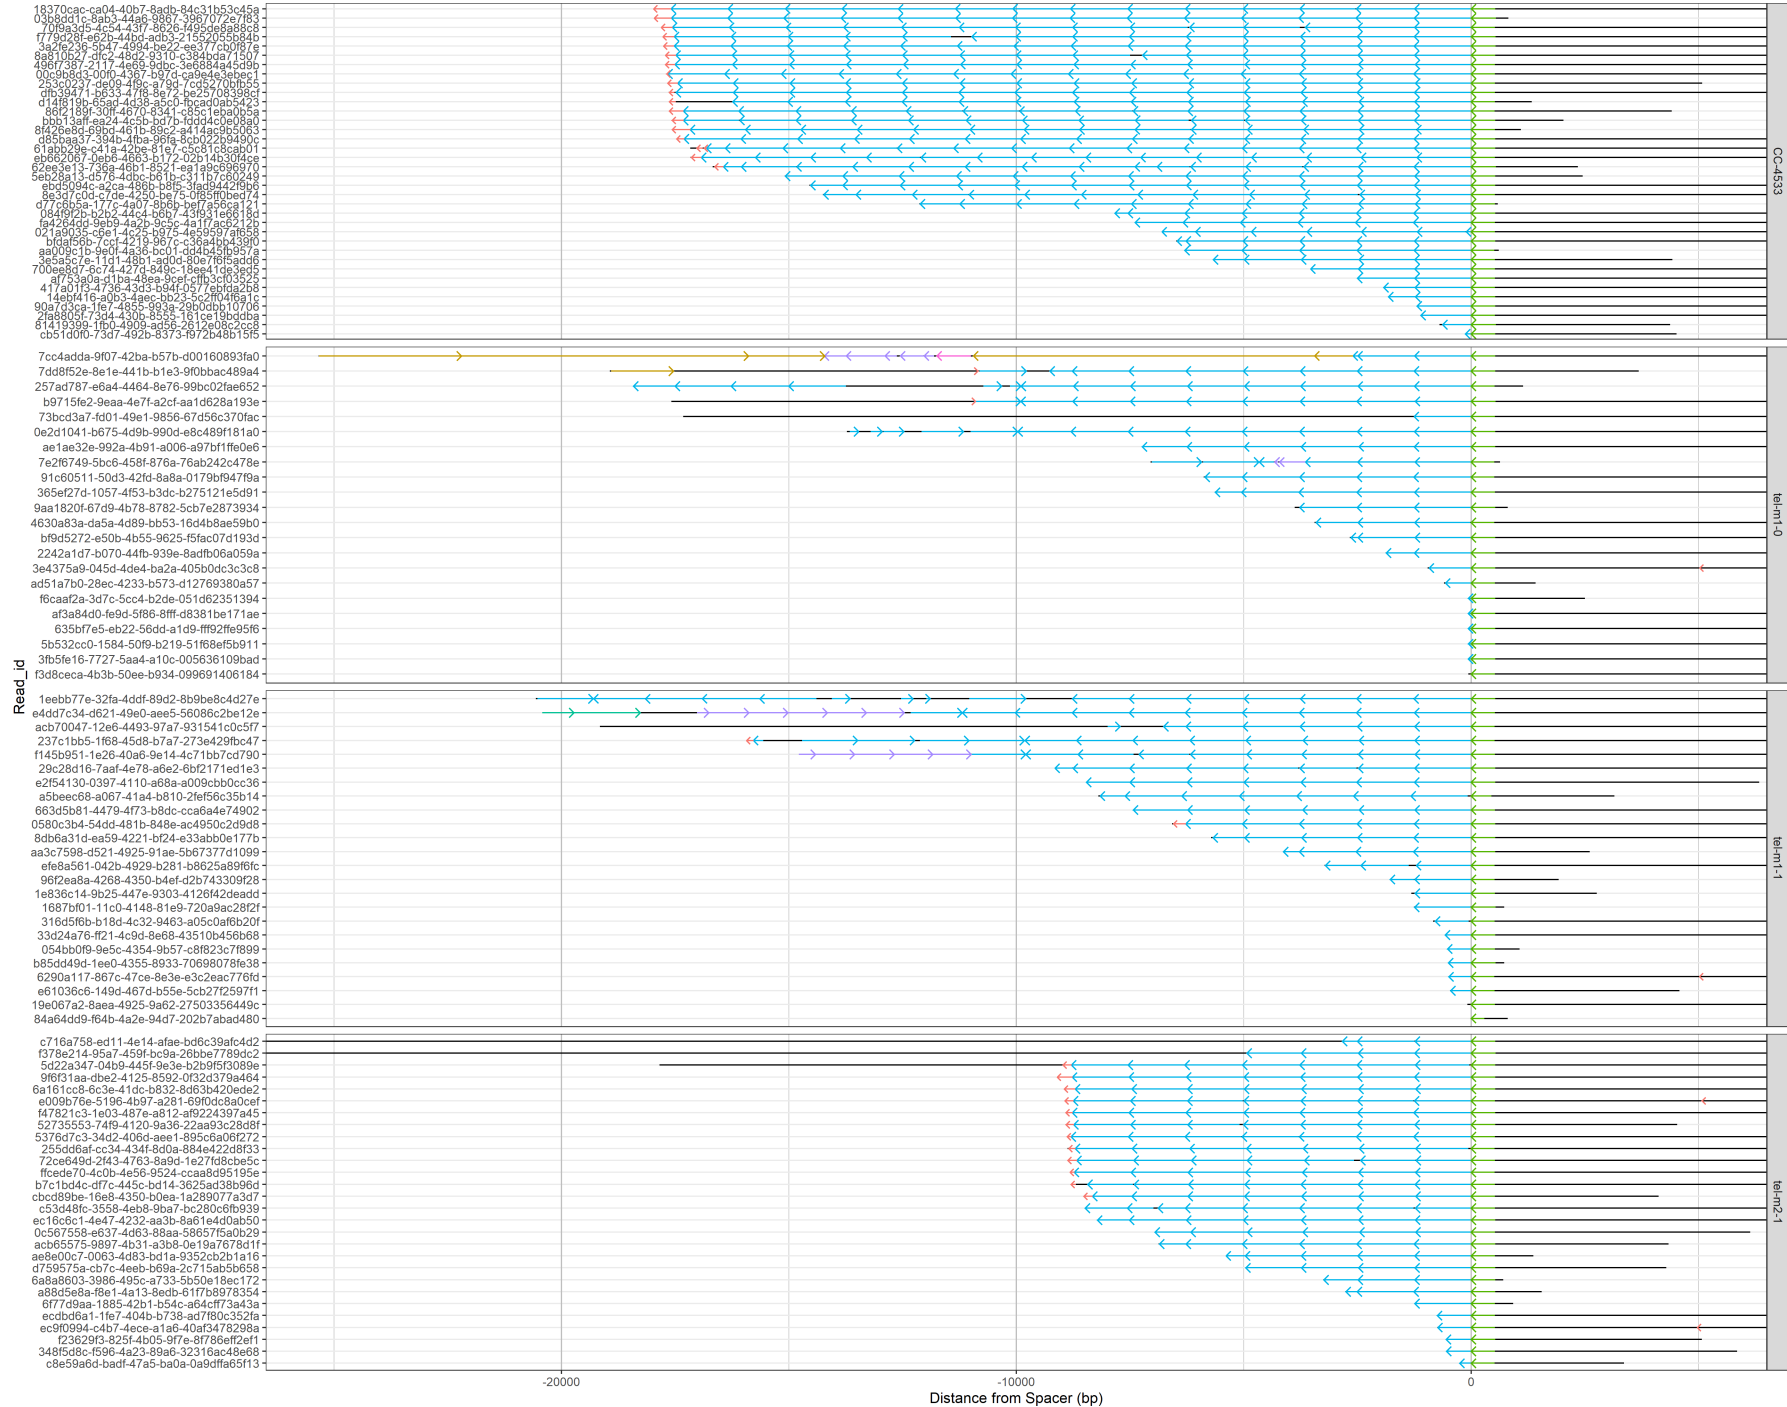

Spacer\_14\_L

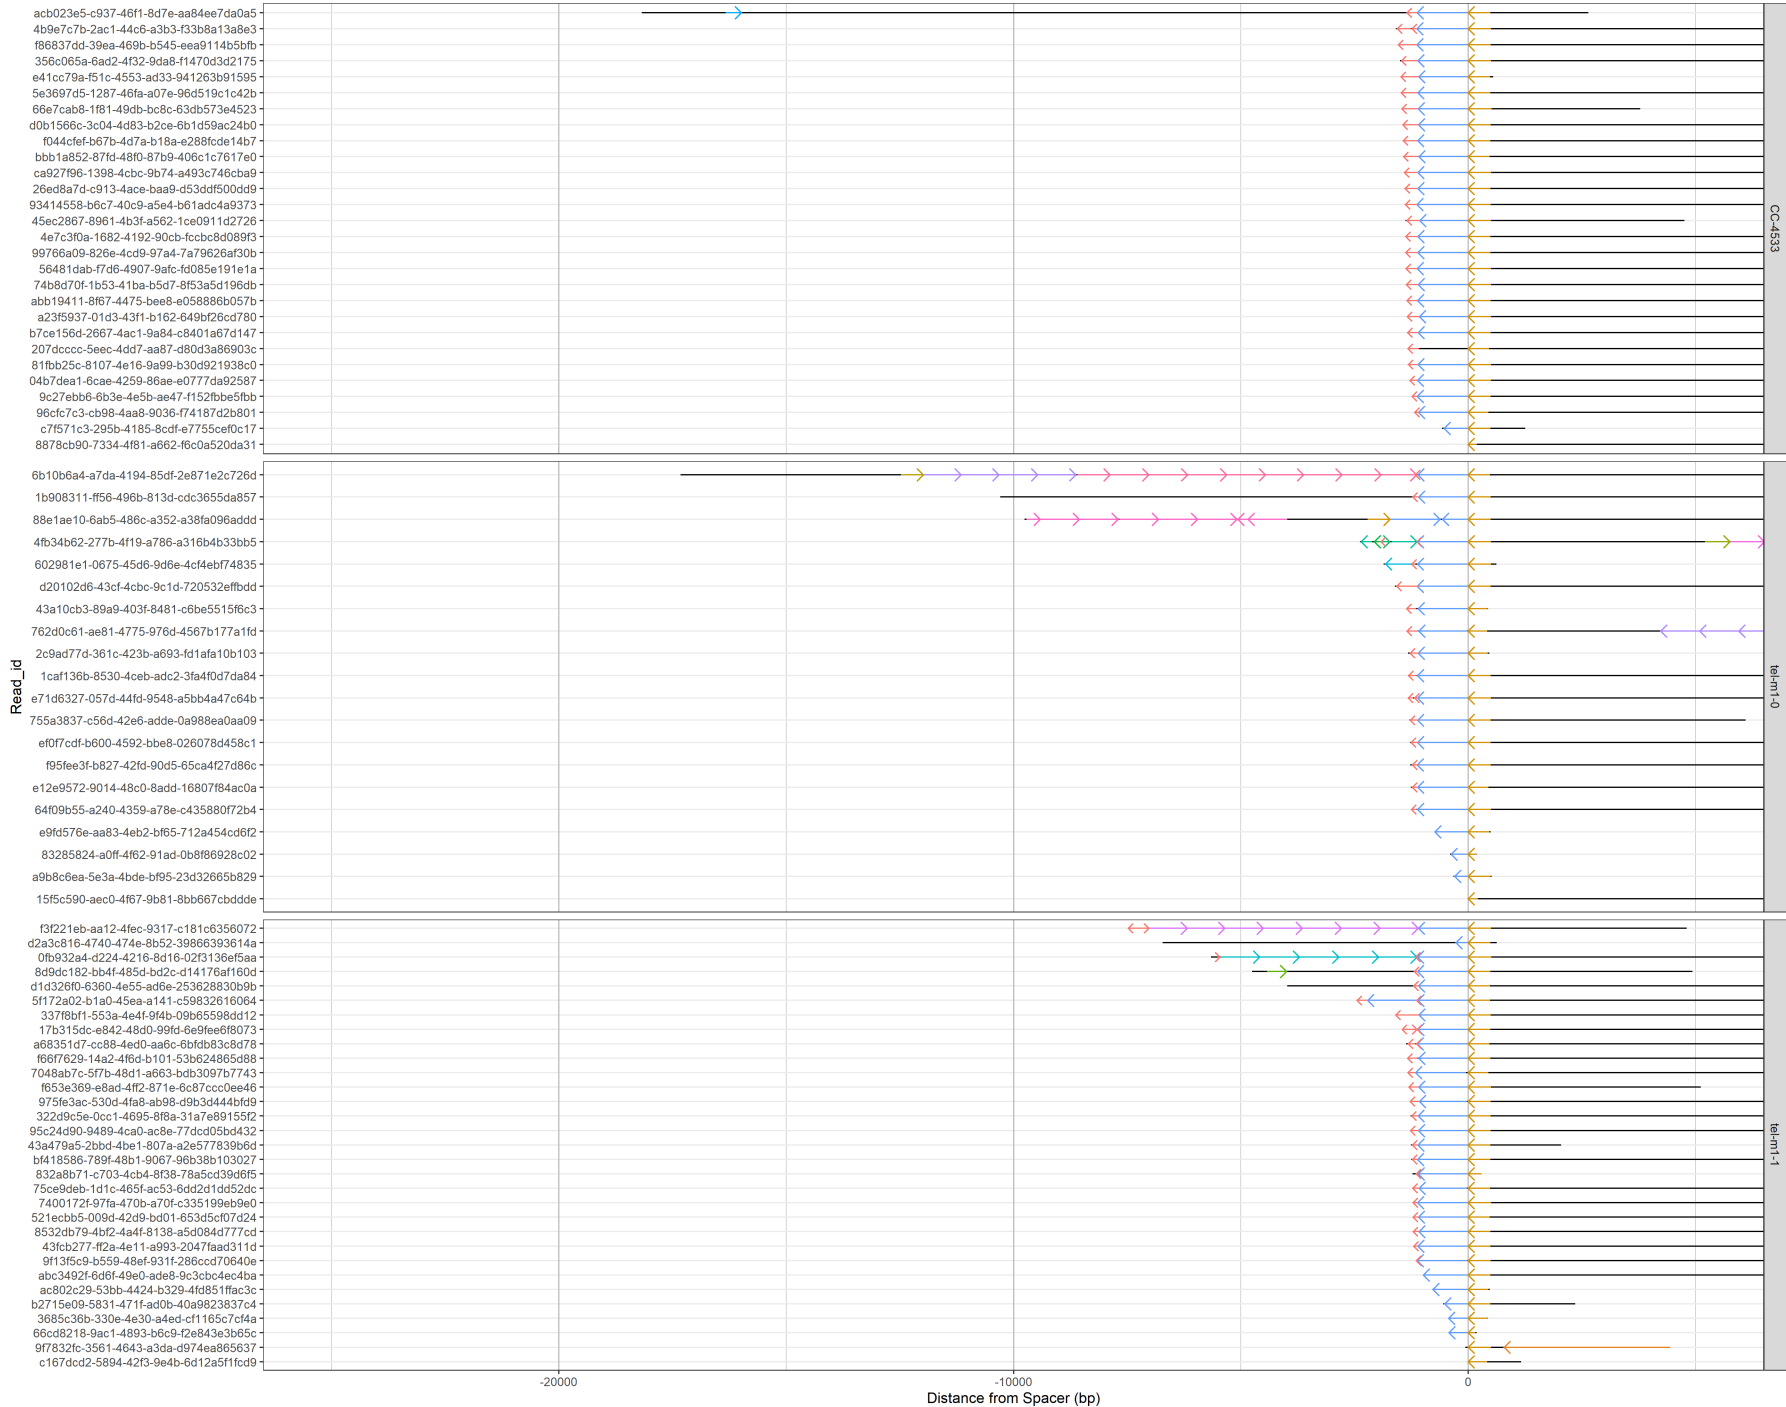

Spacer\_15\_L

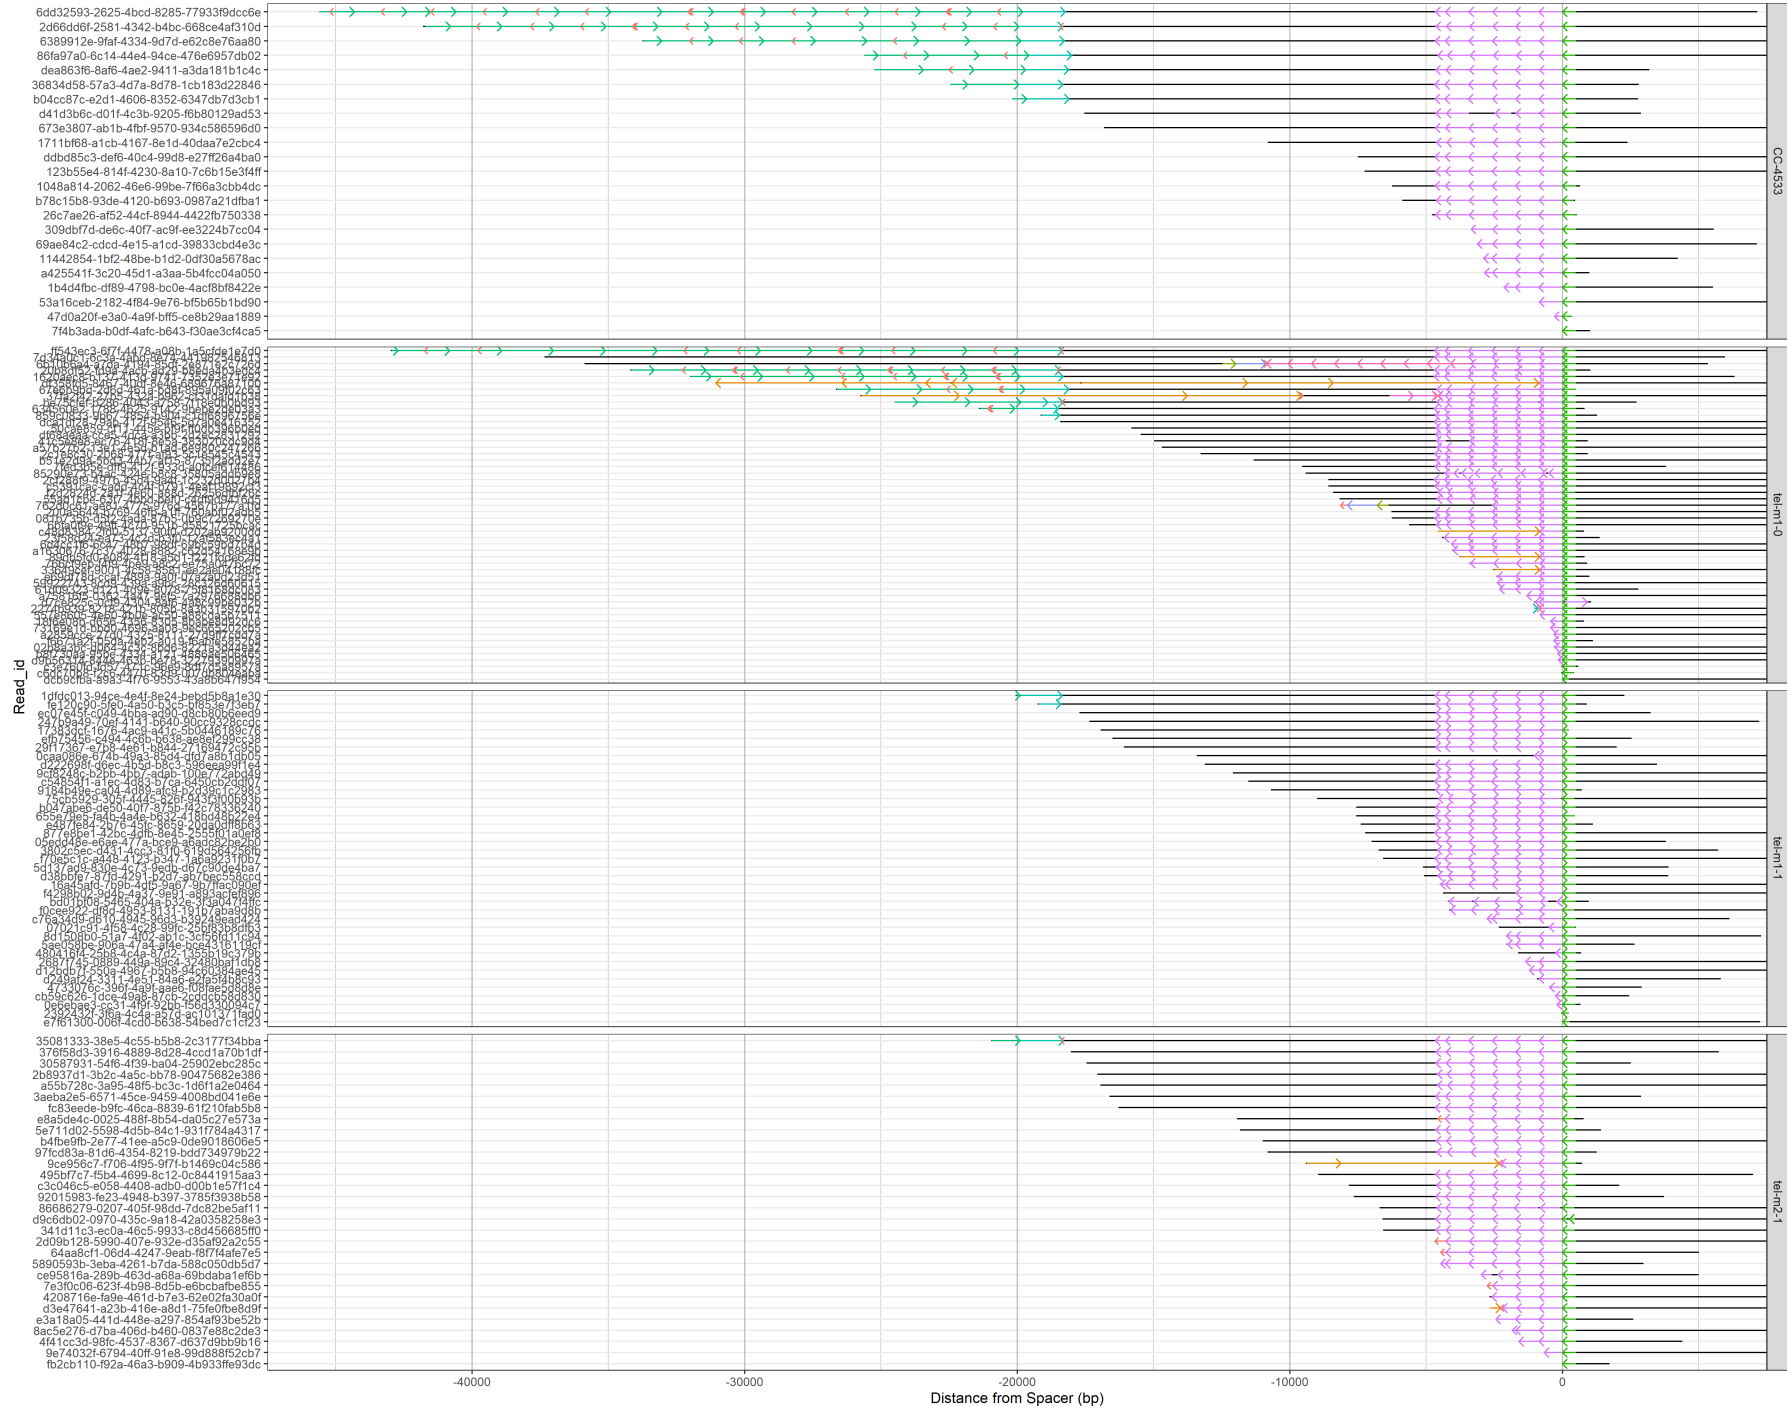

-40000

-30000

-20000

-10000

0

Distance from Spacer (bp)

Query

- 1. Telomere
- rDNA
- Spacer\_12\_L
- Spacer\_14\_L
- Spacer\_15\_L
- Suber\_1900
- Suber\_2500
- Sultan\_12\_L
- Sultan\_13\_L
- Sultan\_14\_L
- Sultan\_15\_L
- Sultan\_6\_R
- Sultan\_7\_R

Spacer\_15\_R

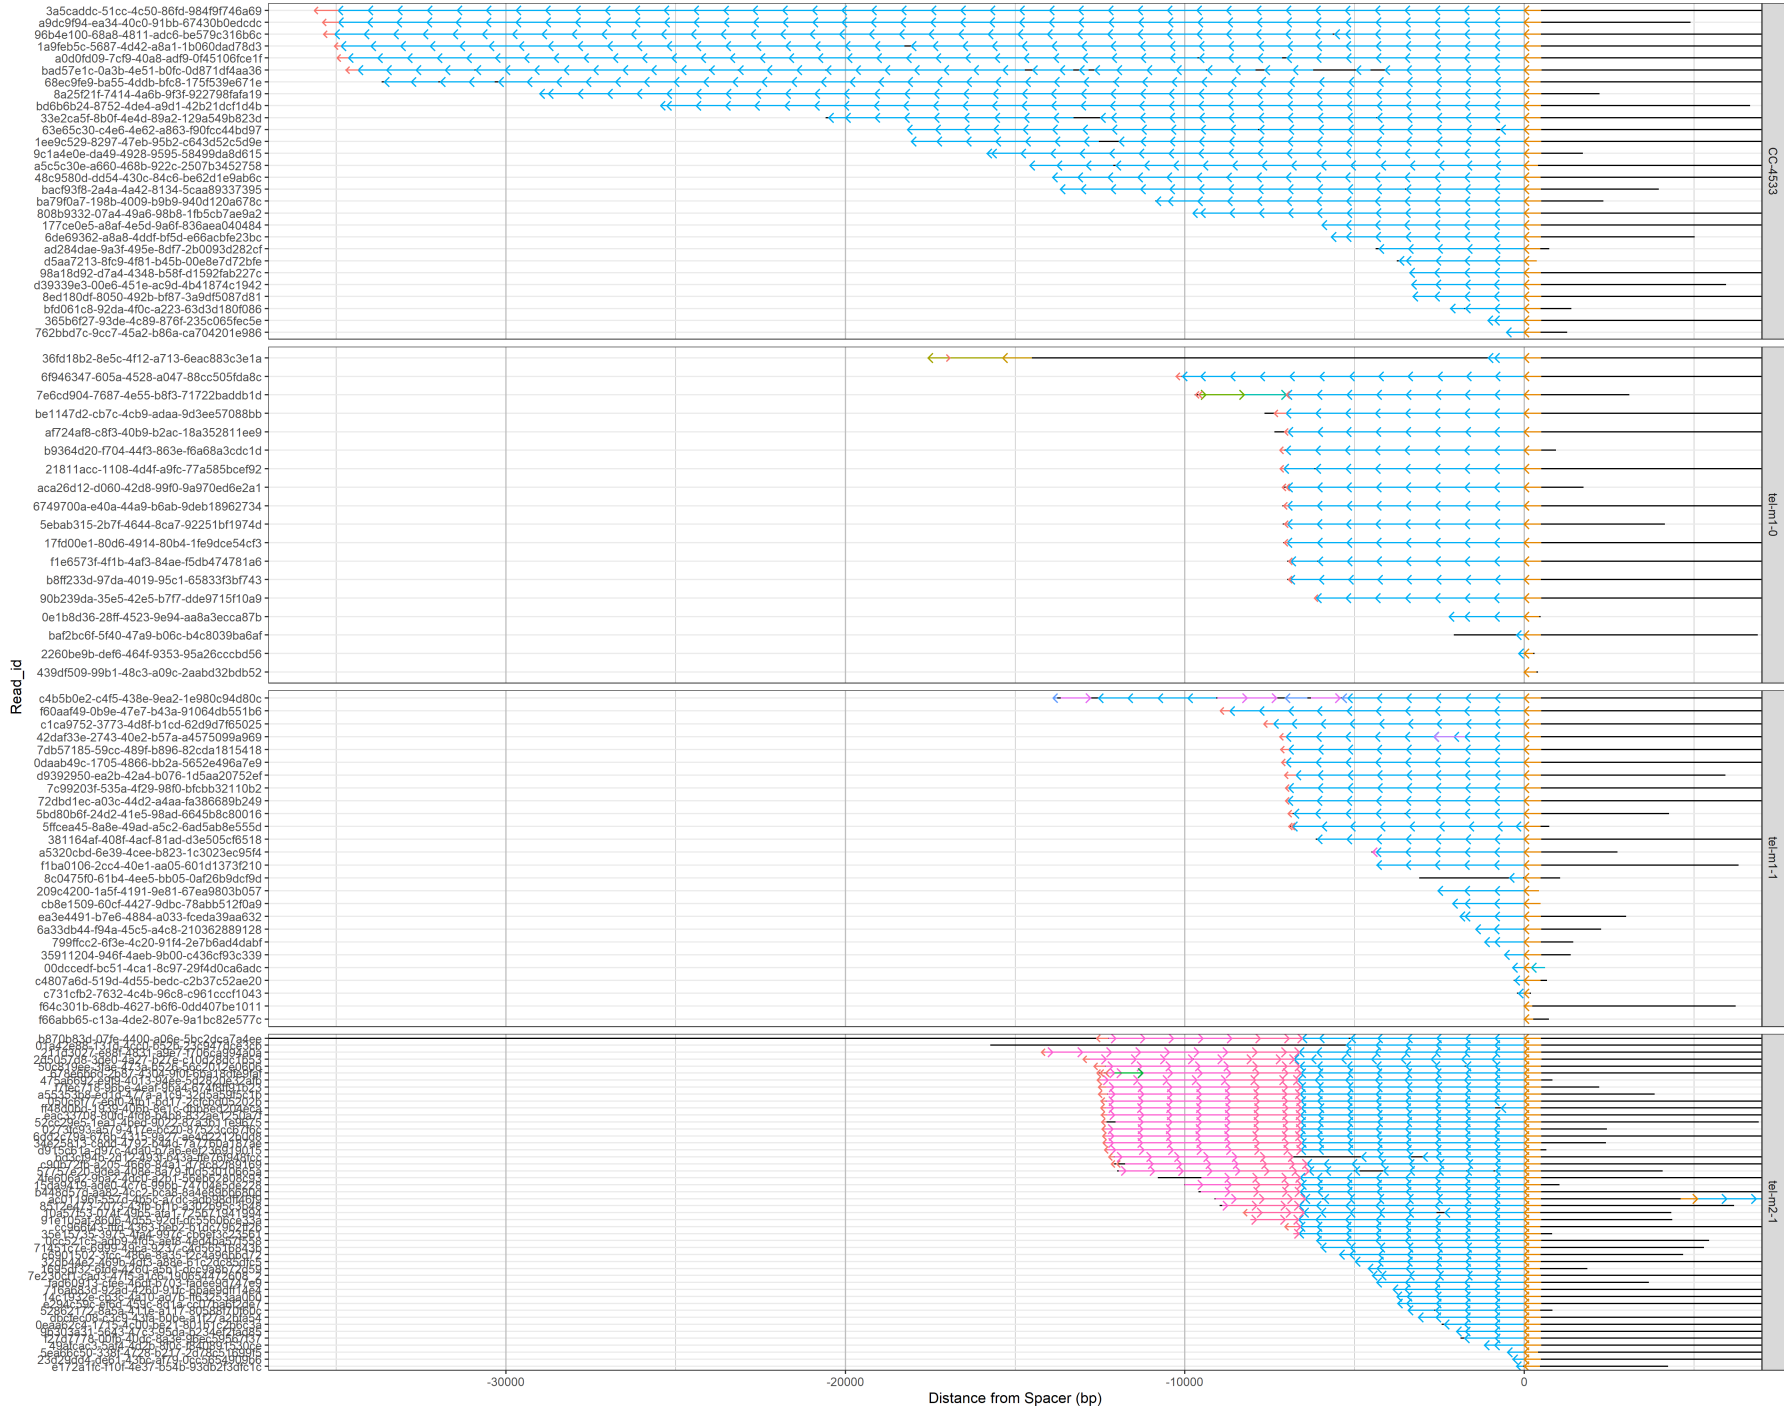

- Query
- 1. Telomere
  - Spacer\_15\_R
  - Suber\_1900
  - Suber\_2500
  - Sultan\_10\_R
  - Sultan\_11\_L
  - Sultan\_12\_R
  - Sultan\_13\_L
  - Sultan\_13\_R
  - Sultan\_15\_R
  - Sultan\_17\_R
  - Sultan\_4\_R
  - Sultan\_6\_R
  - Sultan\_7\_R
  - Sultan\_8\_L

Distance from Spacer (bp)

Spacer\_16\_L

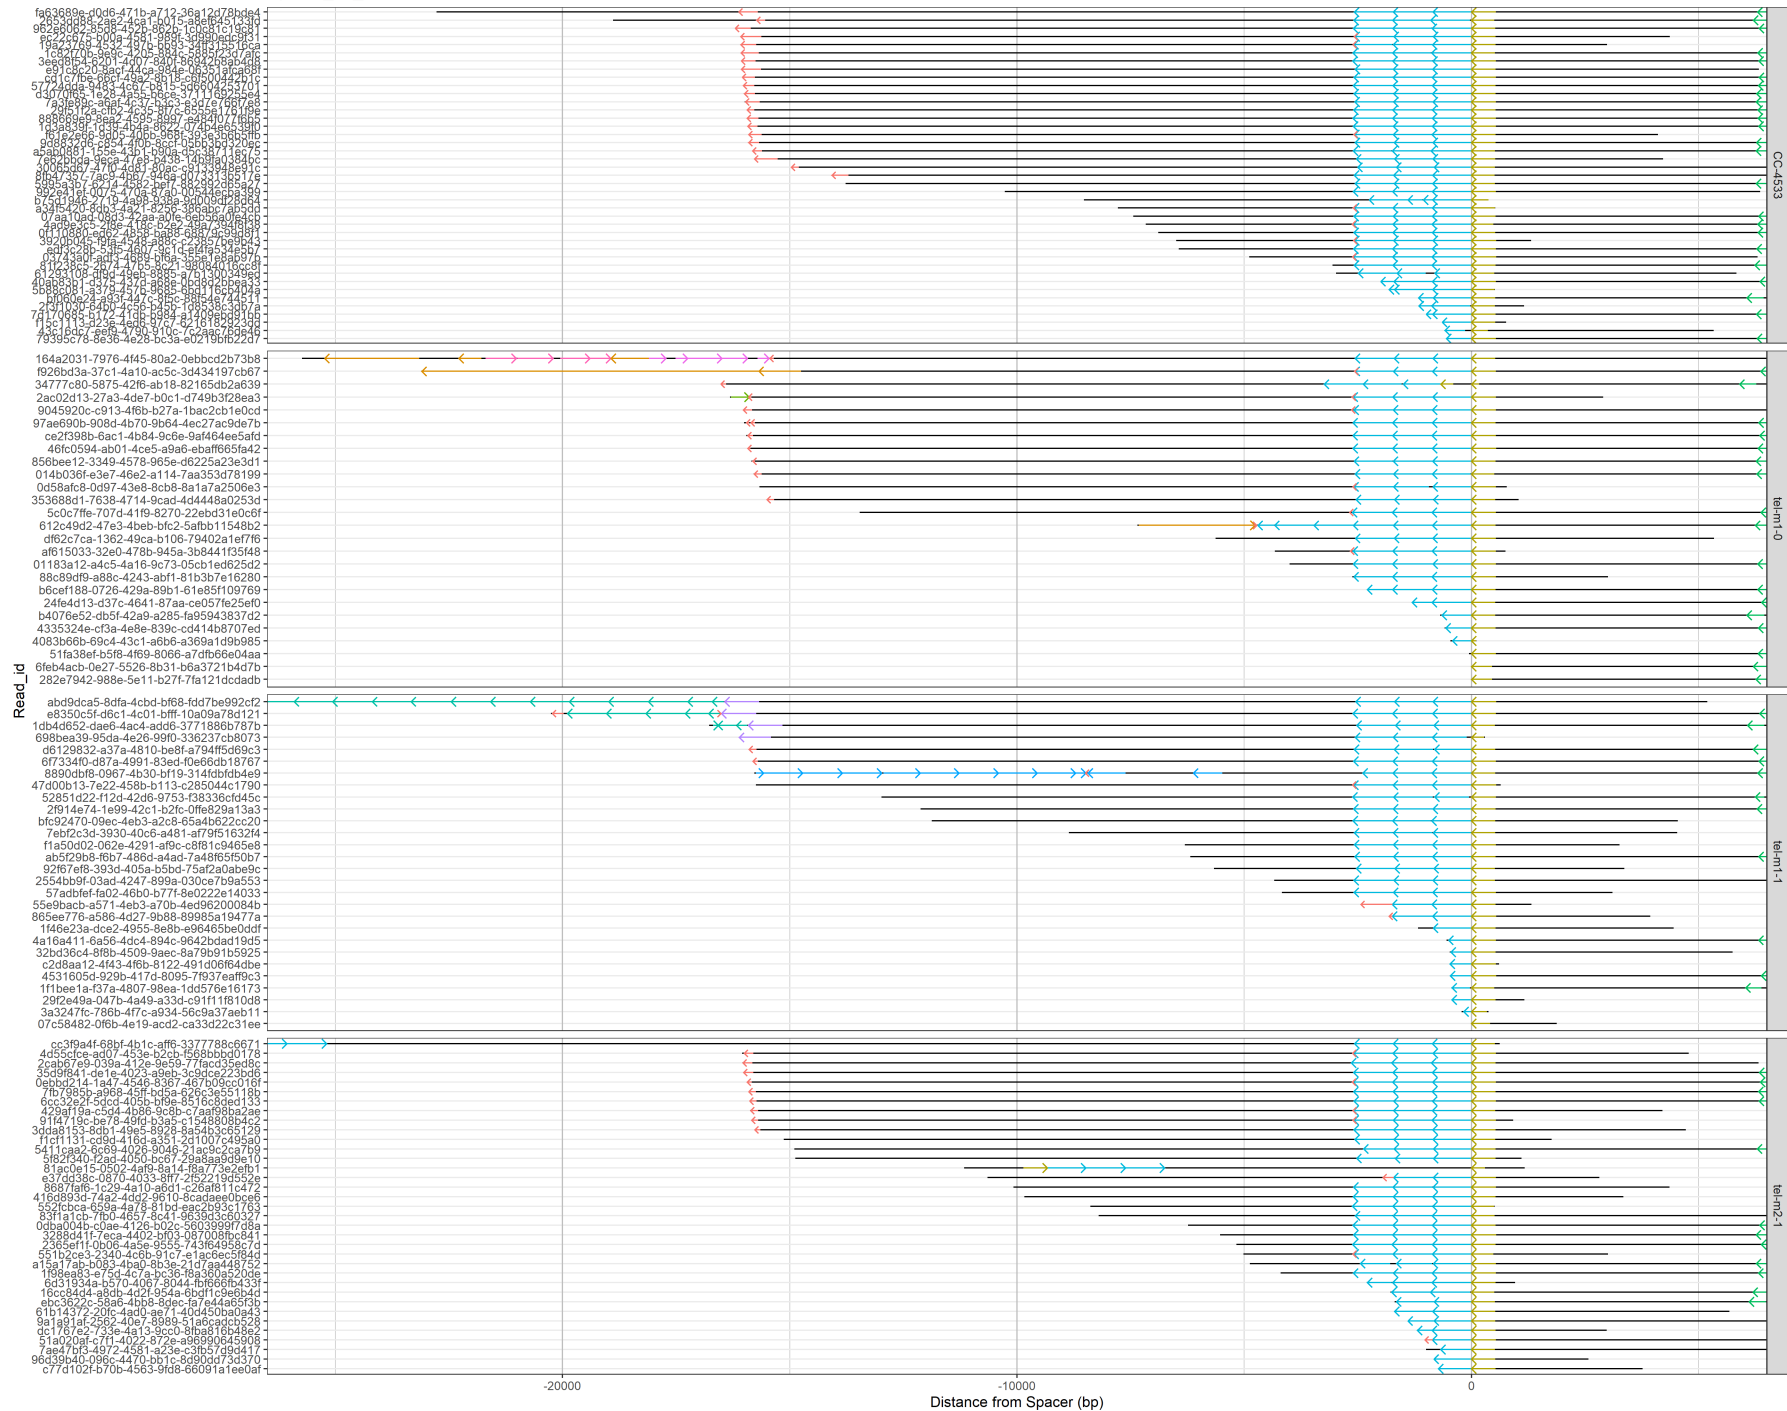

- Query
- 1. Telomere
  - rDNA
  - Spacer\_16\_L
  - Sultan\_10\_R
  - Sultan\_13\_L
  - Sultan\_13\_R
  - Sultan\_16\_L
  - Sultan\_17\_R
  - Sultan\_3\_L
  - Sultan\_4\_L
  - Sultan\_8\_L



Spacer\_16\_R

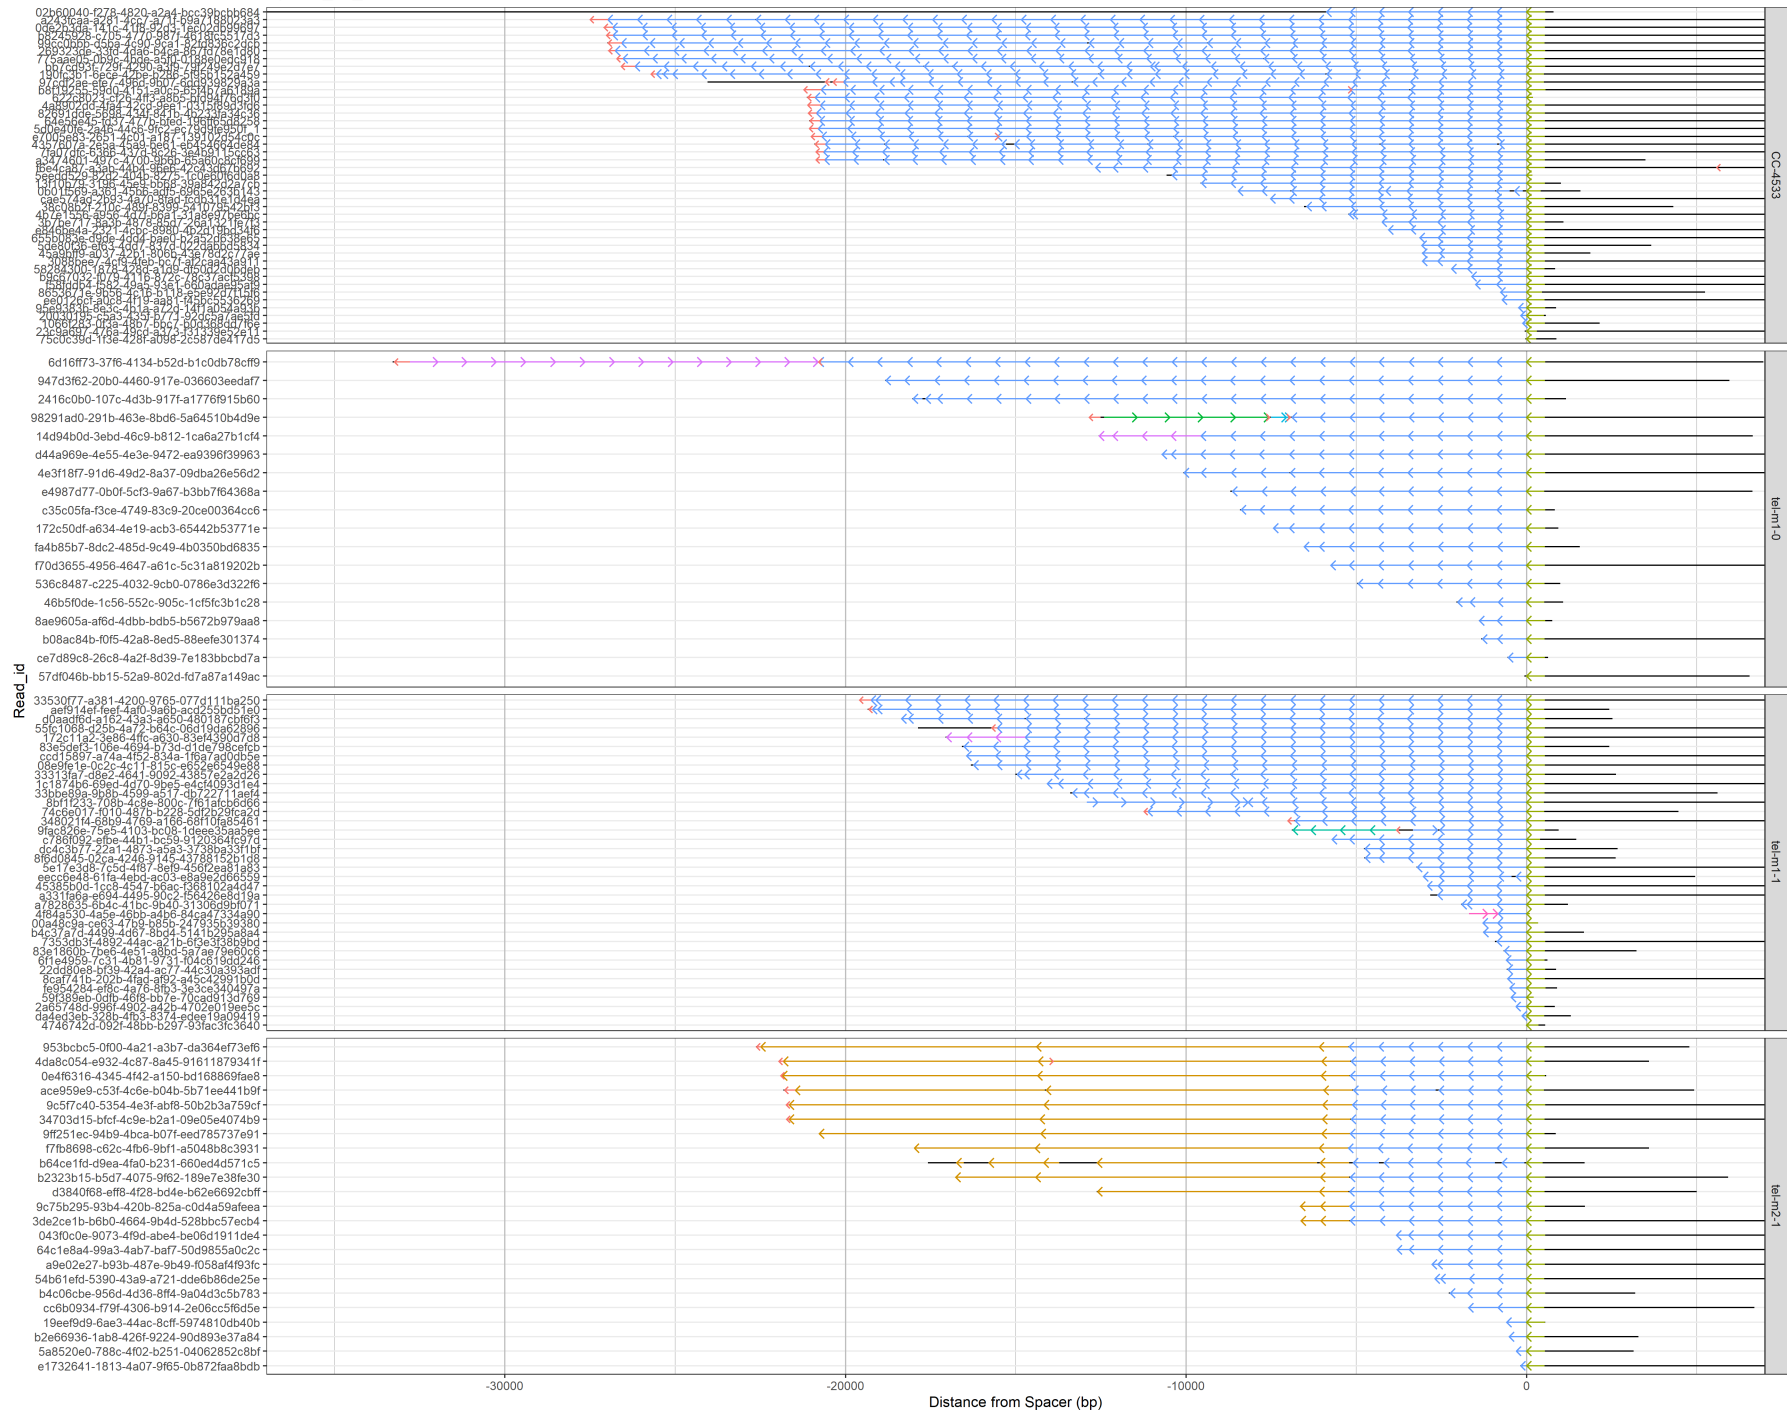

- Query
- 1. Telomere
  - rDNA
  - Spacer\_16\_R
  - Sultan\_1\_R
  - Sultan\_10\_L
  - Sultan\_11\_R
  - Sultan\_16\_R
  - Sultan\_2\_L
  - Sultan\_9\_L

Spacer\_17\_L

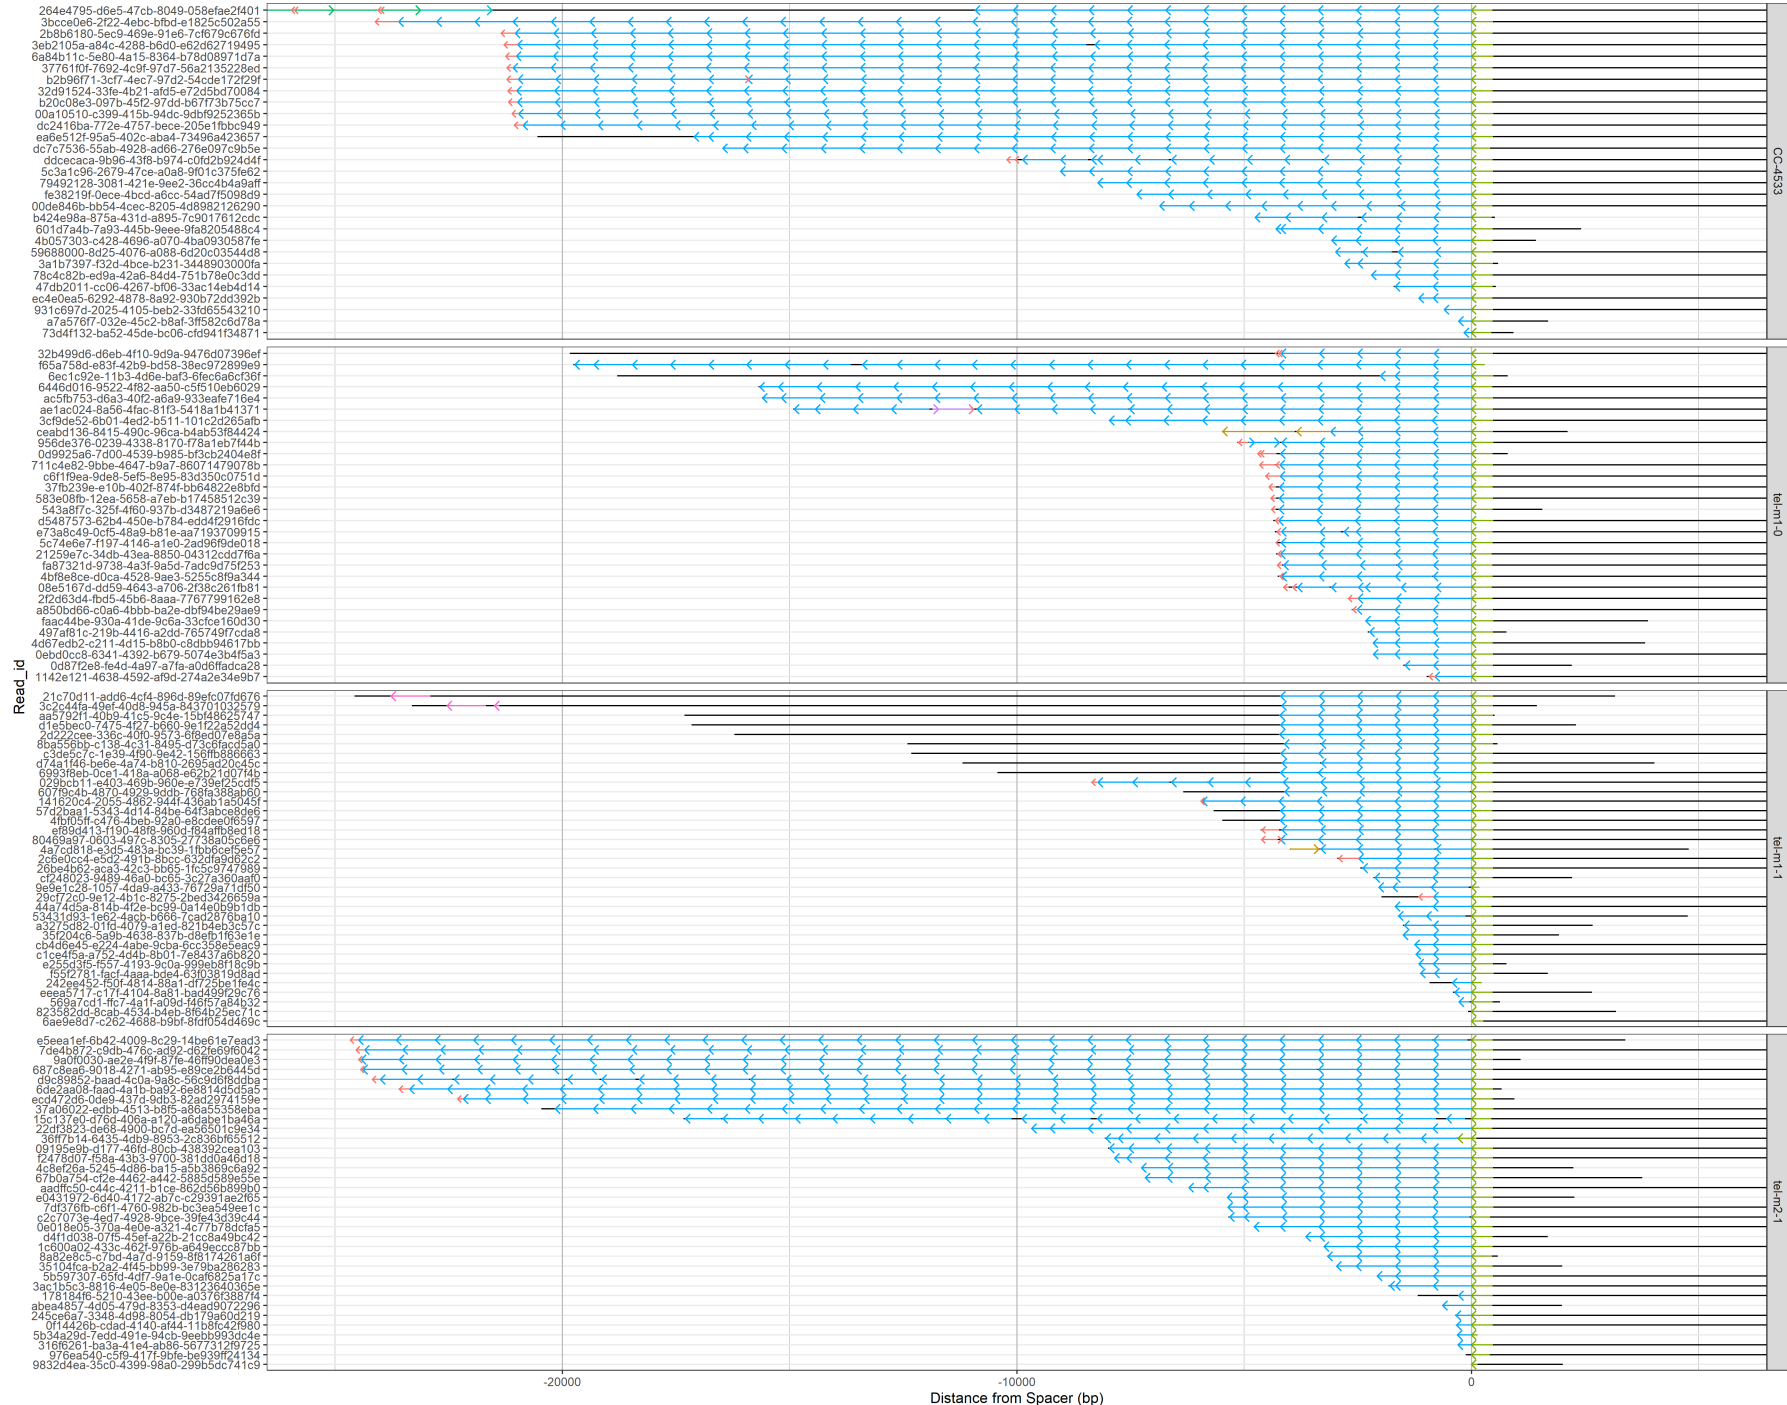

- Query
- 1. Telomere
  - rDNA
  - Spacer\_17\_L
  - Suber\_1900
  - Sultan\_17\_L
  - Sultan\_17\_R
  - Sultan\_5\_R

-20000

-10000

0

Distance from Spacer (bp)

Spacer\_17\_R

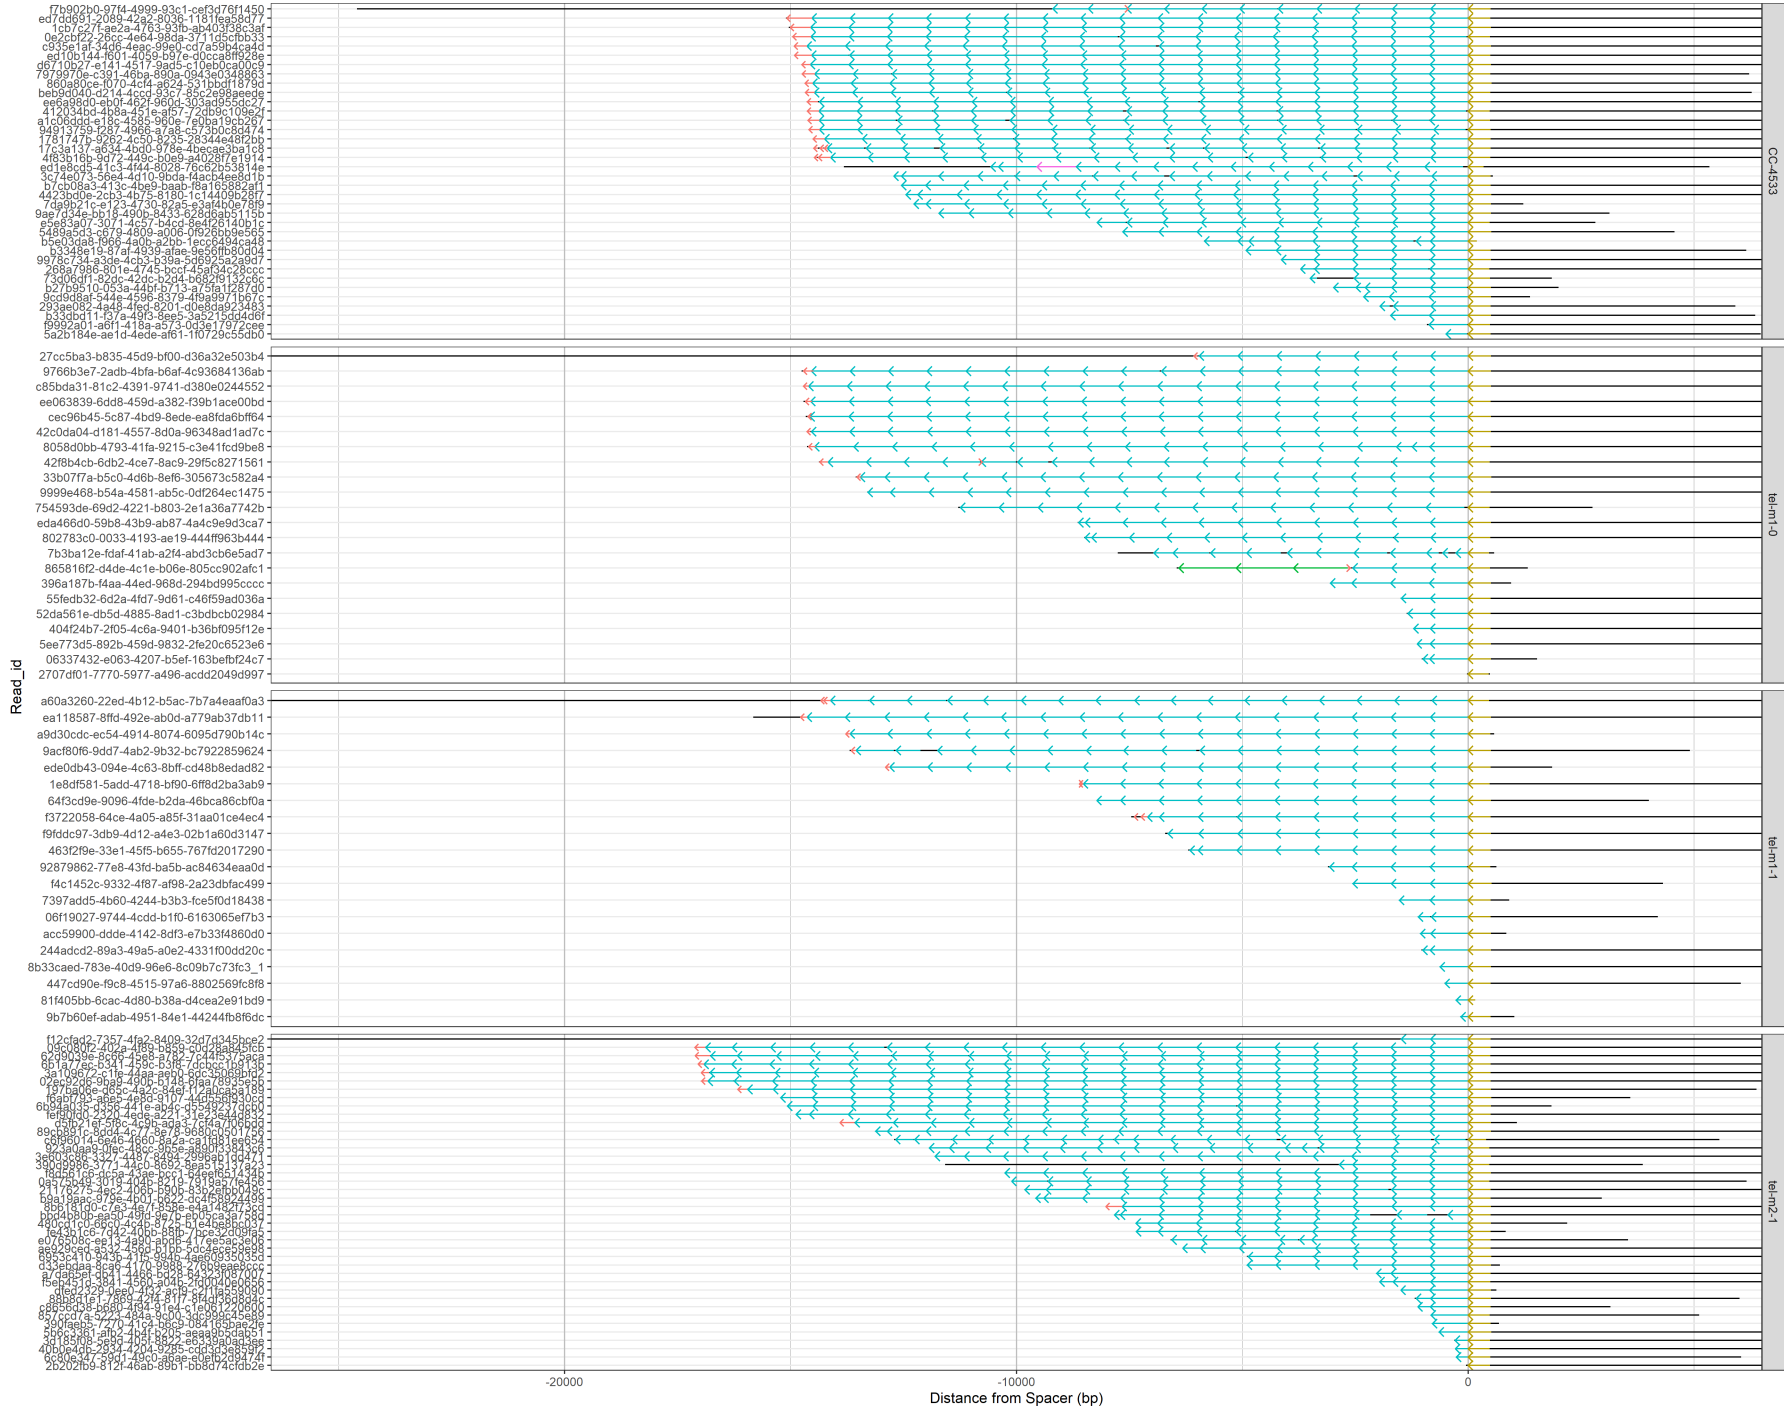

779902b0-97f4-4999-93c1-cef3d76f1450  
ed7dd891-2089-4292-5036-118116e56d7  
1c67c277a62a-4e64-98db-ab40385639  
0a2c0a72-28c2-4e64-98db-ab40385639  
c039e1af-3406-28ac-99e0-cd7ae59b4c4d  
ed10b144-6f01-4404-9029-76c2eac2b1c  
d6710b7-e1d1-4517-99d5-c10e0bca00c9  
7979970e-c911-4404-9029-76c2eac2b1c  
360e80ce-1070-4c74-a824-531bbd1879c  
beb9d0d0-d214-4cc0-93c7-85c2e98aeedc  
e0a968d0-eb07-4e71-9e53-82b09e5e59  
412034bd-4b8a-251e-a577-d9bc108e7f  
a1c0c9d9-4e64-98db-ab40385639  
0491375e-1877-406a-af3e-c933bc8d474  
17817479-8762-4cc0-93c7-85c2e98aeedc  
17ca1107-4e64-98db-ab40385639  
4f8311b5-3d72-449c-b0e5-a402877e1914  
ed1168cc-e1c3-4404-9029-76c2eac2b1c  
3c74e073-56e4-4d10-9bda-f4ac4de8d1b  
17cd08aa-413c-4ba9-ba8b-f8a163282f1  
4223c09e-2cb1-b730-3235-33af40e7819  
dab671c-e173-4008-8433-9435e81131  
9ae7142e-1e19-4008-8433-9435e81131  
e9e83a07-3071-4c57-b4cd-8ed26140b1c  
5489e5c1-c674-4809-a000-092b09d5e59  
b5e03da8-1966-4a0b-a2bb-1ec0c494cad  
997c349e18-87af-4309-afae-9e56f88d9d7  
997c349e18-87af-4309-afae-9e56f88d9d7  
73d0d9f1-e20e-427c-42d4-b89261529cc  
269a7986-801e-4745-bccf-45af34c29cc  
b27b9510-053a-44bf-b713-af5a11267d0  
9c0c0d8f-544c-459e-3379-969891b67  
283ae02-4448-4f6e-8201-d0e8a91b455  
b33abd11-137a-49f3-8e95-3a5715dd4d0f  
6992a01-ab11-4138-ae57-04931577c99e  
5a2b184e-ae1d-4ede-af61-1f0729c55d00

27cc5ba3-b835-45d9-bf00-d36a32e503b4  
9766b3e7-2adb-4bfa-b6af-4c93684136ab  
c85bda31-81c2-4391-9741-d380e0244552  
ee063839-6dd8-459d-a382-f39b1ace00bd  
cec96b45-5c87-4bd9-8ede-ea8fda6bfff4  
42c0da04-d181-4557-8d0a-96348ad1ad7c  
8058d0bb-4793-41fa-9215-c3e41fcd98e8  
42f8b4cb-6db2-4ce7-8ac9-29f5c8271561  
33b0777a-b5c0-4d6b-8ef6-305673582a4  
9999e468-b54a-4581-ab5c-0df264ec1475  
754593de-69d2-4221-b803-2e1a36a7742b  
eda466d0-59b8-43b9-ab87-4a4c9e9d3ca7  
802783c0-0033-4193-ae19-444f963b444  
7b3ba12e-fdaf-41ab-a2f4-abd3cb6e5ad7  
865816f2-d4de-4c1e-b06e-805cc902af1  
396a187b-f4aa-44ed-968d-294bd995cccc  
55fedb32-6d2a-4fd7-9d61-c46f59ad036a  
52a581e-b5d1-4885-8ad1-c3bd0cb02984  
404f24b7-2f05-4c6a-8401-b36bf095f12e  
5ee773d5-892b-459d-9832-2fe20c65236e  
06337432-e063-4207-b5ef-163befb124c7  
2707df01-7770-5977-a496-accd2049d997

a80a3260-22ed-4b12-b5ac-7b7a4eaa0a3  
ea118587-8ffd-492e-ab0d-a799ab37db11  
a9d30cdc-ec54-4914-8074-6095d790b14c  
9ac8f0f6-9dd7-4ab2-9b32-bc7922859e24  
ede0db43-094e-4c63-bfff-cd48b8edad82  
1e8df581-5add-4718-bf90-6ff8d2ba3ab9  
64f3cd9e-9096-4fde-b2da-4f6ca86cbf0a  
f3722058-64ce-4a05-a85f-31aa01ce4ec4  
f9fddc97-3db9-4d12-a4e3-02b1a60d3147  
463f2f9e-33e1-45f5-b655-787fd2017290  
92879862-77e8-43fd-ba5b-ac84634eaa0d  
f4c1452c-9332-4f87-af98-2a23dbfac499  
7397add5-4b60-4244-b3b3-fce5f0d18438  
06f19027-9744-4cdd-b1f0-6163065e7f3  
acc59900-ddde-4142-8df3-e7b334860d0  
244addc2-89a3-49a5-a0e2-4331f0dd20c  
8b33caed-783e-40d9-9e6e-8c09b7c73fc3\_1  
447cd90e-f9c8-4515-97ae-8802569fc8f8  
81f405bb-6cac-4d80-b38a-d4cea2e91bd9  
9b7b60ef-adab-4951-84e1-44244fb8f6dc

f12cfad2-7357-4fe2-8409-32d74345bc2  
09c08072-11a4-48e3-89b9-0d72882f6c2  
603000e6-8311-49ec-837f-7dccc179393  
6a1a77ec-b311-49ec-837f-7dccc179393  
0e6e920c-9c89-4d06-ef18-8faa7889e9e  
f8a9a9e6-ae8c-9e07-af97-af97af97af97  
6b1e810e-2b5d-4ede-abd1-93e28c02984  
89c0007f-650c-4c6e-8a2a-ca1bd8895c5  
c036017a-5e6c-4660-8a2a-ca1bd8895c5  
360c0083-3271-410c-8895-99bab10d47  
0a2c0a72-28c2-4e64-98db-ab40385639  
0a2c0a72-28c2-4e64-98db-ab40385639  
c1170275-89c2-400b-890c-80c2e0009c9  
80b1f400-c7e6-4660-8a2a-ca1bd8895c5  
400c0100-8967-410c-8895-99bab10d47  
e07c008c-e112-288b-af17-af9eac00d0  
8e53c410-8a55-410c-8895-99bab10d47  
03e1dada-8c11-410c-8895-99bab10d47  
f5e18510-d1a4-439b-b40c-60c0e000000  
6818810e-8e68-41a7-8f17-8f178f178f17  
8570cd7e-3272-410c-8895-99bab10d47  
506e810e-af12-410c-8895-99bab10d47  
40b1e4de-2837-410c-8895-99bab10d47  
6c0e0437-5304-410c-8895-99bab10d47  
2c202f69-8121-46ab-8501-bb8d74cfd2be
